# Supplementary material
Source: publisher figshare collection journal article supplement (https://gsajournals.figshare.com/articles/dataset/_/14525475)
Supplement: Supplementary file 1 [file 1]

## Sheet: Supplement table 1
Supplement table 1 Background of each genotype in BAP.
Genotype	Province	Country	Region	Coordinate	Elevation	Collected.year	Type	Race	Cluster	Link
BTx623		United States	North America	37.09024, -95.712891	1086.32	1992	Grain	Unknown	5	https://npgsweb.ars-grin.gov/gringlobal/accessiondetail.aspx?id=1459134
PI 144134	KwaZulu-Natal, Mount Edgecombe	South Africa	Southern Africa	-29.725468, 31.045658	109.8	1942	Sweet	Unknown	7	https://npgsweb.ars-grin.gov/gringlobal/accessiondetail.aspx?id=1135790
PI 145619	KwaZulu-Natal, Mount Edgecombe	South Africa	Southern Africa	-29.725468, 31.045658	109.8	1942	Sweet	Caudatum	7	https://npgsweb.ars-grin.gov/gringlobal/accessiondetail.aspx?id=1135831
PI 145626		South Africa	Southern Africa	-30.559482, 22.937506	1329.33	1942	Sweet	Kafir-bicolor	7	https://npgsweb.ars-grin.gov/gringlobal/accessiondetail.aspx?id=1135834
PI 145632		South Africa	Southern Africa	-30.559482, 22.937506	1329.33	1942	Sweet	Unknown	7	https://npgsweb.ars-grin.gov/gringlobal/accessiondetail.aspx?id=1135835
PI 145633		South Africa	Southern Africa	-30.559482, 22.937506	1329.33	1942	Cellulosic	Unknown	7	https://npgsweb.ars-grin.gov/gringlobal/accessiondetail.aspx?id=1135836
PI 146890		Congo	Central Africa	-4.038333, 21.758664	281.95	1943	Sweet	Unknown	7	https://npgsweb.ars-grin.gov/gringlobal/accessiondetail.aspx?id=1135897
PI 147224	Bengaluru	India	Asia	12.980725, 77.591108	914.65	1943	Sweet	Unknown	7	https://npgsweb.ars-grin.gov/gringlobal/accessiondetail.aspx?id=1135912
PI 152591	Equatoria	South Sudan	Eastern Africa	4.867808, 31.545448	484	1945	Cellulosic	Caudatum	2	https://npgsweb.ars-grin.gov/gringlobal/accessiondetail.aspx?id=1136408
PI 152651	Blue Nile	Sudan	Eastern Africa	11.266667, 34.066667	678.97	1945		Unknown	7	https://npgsweb.ars-grin.gov/gringlobal/accessiondetail.aspx?id=1136446
PI 152694	Kadugli	Sudan	Eastern Africa	11.158209, 29.730811	530.69	1945	Sweet	Unknown	6	https://npgsweb.ars-grin.gov/gringlobal/accessiondetail.aspx?id=1136468
PI 152727	Equatoria	South Sudan	Eastern Africa	4.867808, 31.545448	484	1945	Cellulosic	Unknown	1	https://npgsweb.ars-grin.gov/gringlobal/accessiondetail.aspx?id=1136480
PI 152728	Equatoria	South Sudan	Eastern Africa	4.867808, 31.545448	484	1945	Cellulosic	Durra	5	https://npgsweb.ars-grin.gov/gringlobal/accessiondetail.aspx?id=1136481
PI 152733	Equatoria	South Sudan	Eastern Africa	4.867808, 31.545448	484	1945	Sweet	Caudatum	6	https://npgsweb.ars-grin.gov/gringlobal/accessiondetail.aspx?id=1136485
PI 152751	Equatoria	South Sudan	Eastern Africa	4.867808, 31.545448	484	1945	Sweet	Guinea-caudatum	6	https://npgsweb.ars-grin.gov/gringlobal/accessiondetail.aspx?id=1136494
PI 152771	Kassala	South Sudan	Eastern Africa	15.458296, 36.403648	508.65	1945	Sweet	Unknown	6	https://npgsweb.ars-grin.gov/gringlobal/accessiondetail.aspx?id=1136503
PI 152816	Northern Province	Sudan	Eastern Africa	19.623253, 29.322226	312.08	1945	Sweet	Unknown	6	https://npgsweb.ars-grin.gov/gringlobal/accessiondetail.aspx?id=1136516
PI 152828		Congo	Central Africa	-4.038333, 21.758664	281.95	1945	Cellulosic	Unknown	7	https://npgsweb.ars-grin.gov/gringlobal/accessiondetail.aspx?id=1136526
PI 152860	Equatoria	South Sudan	Eastern Africa	4.867808, 31.545448	484	1945	Sweet	Unknown	6	https://npgsweb.ars-grin.gov/gringlobal/accessiondetail.aspx?id=1136537
PI 152862	Kadugli	Sudan	Eastern Africa	11.158209, 29.730811	530.69	1945	Sweet	Unknown	6	https://npgsweb.ars-grin.gov/gringlobal/accessiondetail.aspx?id=1136538
PI 152923	Kadugli	Sudan	Eastern Africa	11.158209, 29.730811	530.69	1945	Cellulosic	Unknown	6	https://npgsweb.ars-grin.gov/gringlobal/accessiondetail.aspx?id=1136566
PI 152961	Equatoria	South Sudan	Eastern Africa	4.867808, 31.545448	484	1945	Sweet	Unknown	6	https://npgsweb.ars-grin.gov/gringlobal/accessiondetail.aspx?id=1136580
PI 152963	Equatoria	South Sudan	Eastern Africa	4.867808, 31.545448	484	1945	Cellulosic	Unknown	3	https://npgsweb.ars-grin.gov/gringlobal/accessiondetail.aspx?id=1136581
PI 152965	Equatoria	South Sudan	Eastern Africa	4.867808, 31.545448	484	1945	Sweet	Caudatum	6	https://npgsweb.ars-grin.gov/gringlobal/accessiondetail.aspx?id=1136583
PI 152966	Equatoria	South Sudan	Eastern Africa	4.867808, 31.545448	484	1945	Sweet	Unknown	6	https://npgsweb.ars-grin.gov/gringlobal/accessiondetail.aspx?id=1613165
PI 152967	Equatoria	South Sudan	Eastern Africa	4.867808, 31.545448	484	1945	Sweet	Unknown	6	https://npgsweb.ars-grin.gov/gringlobal/accessiondetail.aspx?id=1136584
PI 152971	Equatoria	South Sudan	Eastern Africa	4.867808, 31.545448	484	1945	Sweet	Unknown	6	https://npgsweb.ars-grin.gov/gringlobal/accessiondetail.aspx?id=1136588
PI 153877	Molo	Kenya	Eastern Africa	-0.248608, 35.732431	2493.45	1946	Cellulosic	Guinea	3	https://npgsweb.ars-grin.gov/gringlobal/accessiondetail.aspx?id=1136818
PI 154846	Paluga	Uganda	Eastern Africa	3.637814, 32.947359	1026.99	1946	Sweet	Unknown	3	https://npgsweb.ars-grin.gov/gringlobal/accessiondetail.aspx?id=1137149
PI 154944	Lango	Uganda	Eastern Africa	2.300251, 33.000056	1130.74	1946	Cellulosic	Unknown	6	https://npgsweb.ars-grin.gov/gringlobal/accessiondetail.aspx?id=1137173
PI 154988		Eswatini	Southern Africa	-26.516566, 31.487351	667.92	1946	Cellulosic	Unknown	7	https://www.ars-grin.gov/npgs/pi_books/scans/154/pi154_057.pdf
PI 155149	Ndola	Yemen	Asia	-12.989842, 28.651026	1261.15	1946	Sweet	Unknown	5	https://npgsweb.ars-grin.gov/gringlobal/accessiondetail.aspx?id=1137237
PI 155516	Livingstone	Zambia	Southern Africa	-17.852, 25.8285	930.01	1946	Cellulosic	Unknown	6	https://npgsweb.ars-grin.gov/gringlobal/accessiondetail.aspx?id=1137331
PI 155760	Ncheu	Malawi	Southern Africa	-14.822, 34.6359	1285.9	1946	Cellulosic	Guinea-caudatum	3	https://npgsweb.ars-grin.gov/gringlobal/accessiondetail.aspx?id=1137376
PI 155885	Marangu	Tanzania	Eastern Africa	-3.2815, 37.5201	1433.02	1946	Cellulosic	Unknown	6	https://npgsweb.ars-grin.gov/gringlobal/accessiondetail.aspx?id=1137408
PI 156018		Congo	Central Africa	-4.038333, 21.758664	281.95	1946	Sweet	Bicolor	3	https://npgsweb.ars-grin.gov/gringlobal/accessiondetail.aspx?id=1137436
PI 156178	Lilongwe	Malawi	Southern Africa	-13.9626, 33.7741	1064.5	1946	Cellulosic	Guinea	3	https://npgsweb.ars-grin.gov/gringlobal/accessiondetail.aspx?id=1137460
PI 156203	Fort Johnston	Malawi	Southern Africa	-14.4862, 35.2533	477.71	1946	Cellulosic	Caudatum-bicolor	3	https://npgsweb.ars-grin.gov/gringlobal/accessiondetail.aspx?id=1137468
PI 156217	Dedza	Malawi	Southern Africa	-14.3817, 34.3255	1582.38	1946	Cellulosic	Caudatum	3	https://npgsweb.ars-grin.gov/gringlobal/accessiondetail.aspx?id=1137472
PI 156326	Polombwe	Zambia	Southern Africa	-10.85, 32.65	820.48	1946	Cellulosic	Caudatum	3	https://npgsweb.ars-grin.gov/gringlobal/accessiondetail.aspx?id=1137495
PI 156330	Polombwe	Zambia	Southern Africa	-10.85, 32.65	820.48	1946	Cellulosic	Durra-caudatum	3	https://npgsweb.ars-grin.gov/gringlobal/accessiondetail.aspx?id=1137497
PI 156393	Iringa	Tanzania	Eastern Africa	-7.7681, 35.6861	1552.44	1946	Cellulosic	Caudatum	3	https://npgsweb.ars-grin.gov/gringlobal/accessiondetail.aspx?id=1137518
PI 156463	Kinyangiri	Tanzania	Eastern Africa	-4.4477, 34.6138	1303.83	1946	Cellulosic	Caudatum	6	https://npgsweb.ars-grin.gov/gringlobal/accessiondetail.aspx?id=1137541
PI 156487	Itigi	Tanzania	Eastern Africa	-5.7063, 34.4947	1300.91	1946	Cellulosic	Guinea	3	https://npgsweb.ars-grin.gov/gringlobal/accessiondetail.aspx?id=1137549
PI 156871		Congo	Central Africa	-4.038333, 21.758664	281.95	1946	Cellulosic	Caudatum	3	https://npgsweb.ars-grin.gov/gringlobal/accessiondetail.aspx?id=1137620
PI 156890		Congo	Central Africa	-4.038333, 21.758664	281.95	1943	Sweet	Unknown	7	https://npgsweb.ars-grin.gov/gringlobal/accessiondetail.aspx?id=1135897
PI 157030		Kenya	Eastern Africa	-0.023559, 37.906193	916.85	1946	Cellulosic	Caudatum	3	https://npgsweb.ars-grin.gov/gringlobal/accessiondetail.aspx?id=1137641
PI 157033		Kenya	Eastern Africa	-0.023559, 37.906193	916.85	1946	Sweet	Caudatum	6	https://npgsweb.ars-grin.gov/gringlobal/accessiondetail.aspx?id=1137643
PI 157035		Kenya	Eastern Africa	-0.023559, 37.906193	916.85	1946	Sweet	Unknown	6	https://npgsweb.ars-grin.gov/gringlobal/accessiondetail.aspx?id=1137645
PI 157804		Sudan	Eastern Africa	15.782216, 30.328306	473.05	1947	Cellulosic	Unknown	6	https://npgsweb.ars-grin.gov/gringlobal/accessiondetail.aspx?id=1138069
PI 167093		Egypt	Northern Africa	26.820553, 30.802498	278	1948	Sweet	Durra	6	https://npgsweb.ars-grin.gov/gringlobal/accessiondetail.aspx?id=1143818
PI 170787	Burbur	Turkey	Asia	37.7183, 30.2823	992.17	1948	Sweet	Caudatum-bicolor	7	https://npgsweb.ars-grin.gov/gringlobal/accessiondetail.aspx?id=1147008
PI 175919	Biga, Canakkale	Turkey	Asia	40.2265, 27.2436	72.14	1949	Sweet	Caudatum-bicolor	7	https://npgsweb.ars-grin.gov/gringlobal/accessiondetail.aspx?id=1152349
PI 176766	Konya	Turkey	Asia	37.873003, 32.492744	1024.21	1948	Sweet	Bicolor	5	https://npgsweb.ars-grin.gov/gringlobal/accessiondetail.aspx?id=1153336
PI 179749	Jodhpur	India	Asia	26.242323, 73.026422	212.74	1948	Sweet	Unknown	5	https://npgsweb.ars-grin.gov/gringlobal/accessiondetail.aspx?id=1155830
PI 180348	Sirohi	India	Asia	24.8852, 72.8575	338.12	1949	Sweet	Durra	5	https://npgsweb.ars-grin.gov/gringlobal/accessiondetail.aspx?id=1156129
PI 181080	Panjab	Pakistan	Asia	30.061426, 70.830281	119.52	1948	Sweet	Unknown	5	https://npgsweb.ars-grin.gov/gringlobal/accessiondetail.aspx?id=1156787
PI 181083	Panjab	Pakistan	Asia	30.061426, 70.830281	119.52	1948	Sweet	Unknown	5	https://npgsweb.ars-grin.gov/gringlobal/accessiondetail.aspx?id=1156791
PI 181899	Aleppo	Syria	Asia	36.20115, 37.132447	406.56	1949	Sweet	Unknown	5	https://npgsweb.ars-grin.gov/gringlobal/accessiondetail.aspx?id=1157316
PI 185573	Limpopo	South Africa	Southern Africa	-23.777743, 29.517486	1212.22	1949		Unknown	5	https://npgsweb.ars-grin.gov/gringlobal/accessiondetail.aspx?id=1160160
PI 196049	Dessie	Ethiopia	Eastern Africa	11.12663, 39.637102	2470	1951	Sweet	Durra	8	https://npgsweb.ars-grin.gov/gringlobal/accessiondetail.aspx?id=1166487
PI 196583	Tainan	Taiwan	Asia	22.996955, 120.224687	25.49	1951	Sweet	Unknown	7	https://npgsweb.ars-grin.gov/gringlobal/accessiondetail.aspx?id=1167207
PI 196586		India	Asia	20.593684, 78.96288	476.2	1951	Sweet	Guinea-kafir	7	https://npgsweb.ars-grin.gov/gringlobal/accessiondetail.aspx?id=1167212
PI 196598	Tainan	Taiwan	Asia	22.996955, 120.224687	25.49	1951	Grain	Unknown	7	https://npgsweb.ars-grin.gov/gringlobal/accessiondetail.aspx?id=1167234
PI 197542		Algeria	Northern Africa	28.033886, 1.659626	581.19	1951	Sweet	Bicolor	5	https://npgsweb.ars-grin.gov/gringlobal/accessiondetail.aspx?id=1168227
PI 19770	KwaZulu-Natal, Mount Edgecombe	South Africa	Southern Africa	-29.725468, 31.045658	109.8	1907	Sweet	Caudatum-bicolor	7	https://npgsweb.ars-grin.gov/gringlobal/accessiondetail.aspx?id=1083432
PI 213901		Zimbabwe	Southern Africa	-19.015438, 29.154857	1317.63	1954	Cellulosic	Unknown	5	https://npgsweb.ars-grin.gov/gringlobal/accessiondetail.aspx?id=1176031
PI 217691	Wad-Medani	Sudan	Eastern Africa	14.393725, 33.539281	403.8	1954	Cellulosic	Unknown	6	https://npgsweb.ars-grin.gov/gringlobal/accessiondetail.aspx?id=1177612
PI 218112	Dera Ismail Khan	Pakistan	Asia	31.86846, 70.904113	176.66	1954	Sweet	Unknown	5	https://npgsweb.ars-grin.gov/gringlobal/accessiondetail.aspx?id=1177785
PI 221548	Sokoto	Nigeria	Western Africa	13.005155, 5.248975	306.57	1954	Sweet	Kafir	6	https://npgsweb.ars-grin.gov/gringlobal/accessiondetail.aspx?id=1179351
PI 221651	Wamba	Nigeria	Western Africa	8.94322, 8.602237	371.79	1954	Cellulosic	Guinea	4	https://npgsweb.ars-grin.gov/gringlobal/accessiondetail.aspx?id=1179423
PI 250583		Egypt	Northern Africa	26.820553, 30.802498	278	1958	Sweet	Unknown	5	https://npgsweb.ars-grin.gov/gringlobal/accessiondetail.aspx?id=1193645
PI 251672	Belgrade	Serbia	Europe	44.786901, 20.445939	128.02	1958	Sweet	Unknown	7	https://npgsweb.ars-grin.gov/gringlobal/accessiondetail.aspx?id=1194421
PI 253986	Damascus	Syria	Asia	33.51404, 36.277401	764.06	1958	Cellulosic	Unknown	5	https://npgsweb.ars-grin.gov/gringlobal/accessiondetail.aspx?id=1195161
PI 255744	Taslik	Turkey	Asia	40.372879, 31.84708	1143.54	1959	Cellulosic	Unknown	6	https://npgsweb.ars-grin.gov/gringlobal/accessiondetail.aspx?id=1195953
PI 257599	Addis Ababa	Ethiopia	Eastern Africa	8.973985, 38.752739	2200	1959	Sweet	Caudatum	6	https://npgsweb.ars-grin.gov/gringlobal/accessiondetail.aspx?id=1196893
PI 257600	Addis Ababa	Ethiopia	Eastern Africa	8.973985, 38.752739	2200	1959	Sweet	Caudatum	6	https://npgsweb.ars-grin.gov/gringlobal/accessiondetail.aspx?id=1196894
PI 266927	Coimbatore	India	Asia	8.973985, 38.752739	2275.56	1960	Cellulosic	Unknown	5	https://npgsweb.ars-grin.gov/gringlobal/accessiondetail.aspx?id=1201068
PI 267573	Jimma	Ethiopia	Eastern Africa	7.67471, 36.836567	2009	1960	Cellulosic	Durra	1	https://npgsweb.ars-grin.gov/gringlobal/accessiondetail.aspx?id=1201463
PI 273969	Asmara	Eritrea	Eastern Africa	15.32513, 38.925999	2367	1961	Sweet	Unknown	8	https://npgsweb.ars-grin.gov/gringlobal/accessiondetail.aspx?id=1205738
PI 276837	Dire Dawa	Ethiopia	Eastern Africa	9.600299, 41.848085	1177.75	1961	Sweet	Durra-caudatum	6	https://npgsweb.ars-grin.gov/gringlobal/accessiondetail.aspx?id=1206925
PI 291246		Jamaica	North America	18.109581, -77.297508	430.05	1963		Unknown	5	https://npgsweb.ars-grin.gov/gringlobal/accessiondetail.aspx?id=1220327
PI 300119		South Africa	Southern Africa	-30.559482, 22.937506	1329.33	1964		Unknown	5	https://npgsweb.ars-grin.gov/gringlobal/accessiondetail.aspx?id=1226651
PI 302221		Russia	Europe	61.52401, 105.318756	549.87	1964	Cellulosic	Unknown	5	https://npgsweb.ars-grin.gov/gringlobal/accessiondetail.aspx?id=1227498
PI 302252		China	Asia	35.86166, 104.195397	3011.6	1964	Sweet	Unknown	7	https://npgsweb.ars-grin.gov/gringlobal/accessiondetail.aspx?id=1227517
PI 303658		South Sudan	Eastern Africa	6.895082, 29.91325	404	1965	Sweet	Unknown	6	https://npgsweb.ars-grin.gov/gringlobal/accessiondetail.aspx?id=1227960
PI 329256	Asmara	Eritrea	Eastern Africa	15.32513, 38.925999	2367	1967	Sweet	Unknown	8	https://npgsweb.ars-grin.gov/gringlobal/accessiondetail.aspx?id=1244786
PI 329286	Dire Dawa	Ethiopia	Eastern Africa	9.600299, 41.848085	1177.75	1967	Cellulosic	Unknown	1	https://npgsweb.ars-grin.gov/gringlobal/accessiondetail.aspx?id=1244816
PI 329299	Harar	Ethiopia	Eastern Africa	9.319739, 42.125003	1600	1967	Cellulosic	Unknown	8	https://npgsweb.ars-grin.gov/gringlobal/accessiondetail.aspx?id=1244829
PI 329300	Harar	Ethiopia	Eastern Africa	9.319739, 42.125003	1600	1967	Cellulosic	Unknown	8	https://npgsweb.ars-grin.gov/gringlobal/accessiondetail.aspx?id=1244830
PI 329301	Harar	Ethiopia	Eastern Africa	9.319739, 42.125003	1600	1967	Sweet	Unknown	8	https://npgsweb.ars-grin.gov/gringlobal/accessiondetail.aspx?id=1244831
PI 329310	Errer	Ethiopia	Eastern Africa	9.561424, 41.383607	1071.89	1967	Sweet	Unknown	8	https://npgsweb.ars-grin.gov/gringlobal/accessiondetail.aspx?id=1244840
PI 329319	Ambo	Ethiopia	Eastern Africa	8.969217, 37.857913	2100	1967	Cellulosic	Unknown	1	https://npgsweb.ars-grin.gov/gringlobal/accessiondetail.aspx?id=1244849
PI 329326	Baco	Ethiopia	Eastern Africa	9.124677, 37.058999	2100	1967	Cellulosic	Unknown	1	https://npgsweb.ars-grin.gov/gringlobal/accessiondetail.aspx?id=1244856
PI 329333	Baco	Ethiopia	Eastern Africa	9.124677, 37.058999	1610	1967	Cellulosic	Unknown	6	https://npgsweb.ars-grin.gov/gringlobal/accessiondetail.aspx?id=1244863
PI 329338	Baco	Ethiopia	Eastern Africa	9.124677, 37.058999	1610	1967	Cellulosic	Unknown	5	https://npgsweb.ars-grin.gov/gringlobal/accessiondetail.aspx?id=1244868
PI 329351	Shashamane	Ethiopia	Eastern Africa	7.203823, 38.608264	1500	1967	Cellulosic	Unknown	5	https://npgsweb.ars-grin.gov/gringlobal/accessiondetail.aspx?id=1244881
PI 329394		Ethiopia	Eastern Africa	9.145, 40.489673	2068.14	1967	Sweet	Unknown	8	https://npgsweb.ars-grin.gov/gringlobal/accessiondetail.aspx?id=1244924
PI 329403	South Wollo	Ethiopia	Eastern Africa	10.893354, 39.189579	2100	1967	Sweet	Unknown	8	https://npgsweb.ars-grin.gov/gringlobal/accessiondetail.aspx?id=1244933
PI 329435	Asmara	Eritrea	Eastern Africa	15.32513, 38.925999	2367	1967	Cellulosic	Unknown	6	https://npgsweb.ars-grin.gov/gringlobal/accessiondetail.aspx?id=1244965
PI 329440	Asmara	Eritrea	Eastern Africa	15.32513, 38.925999	2367	1967	Sweet	Unknown	7	https://npgsweb.ars-grin.gov/gringlobal/accessiondetail.aspx?id=1244970
PI 329465	Adi Abun	Ethiopia	Eastern Africa	14.191128, 38.877307	2300	1967	Sweet	Unknown	1	https://npgsweb.ars-grin.gov/gringlobal/accessiondetail.aspx?id=1244995
PI 329466	Adi Abun	Ethiopia	Eastern Africa	14.191128, 38.877307	2300	1967	Cellulosic	Unknown	5	https://npgsweb.ars-grin.gov/gringlobal/accessiondetail.aspx?id=1244996
PI 329471	Mojo	Ethiopia	Eastern Africa	8.587189, 39.123102	1900	1967	Cellulosic	Unknown	1	https://npgsweb.ars-grin.gov/gringlobal/accessiondetail.aspx?id=1245001
PI 329478	Sidamo	Ethiopia	Eastern Africa	7.084048, 38.617149	2000	1967	Cellulosic	Unknown	1	https://npgsweb.ars-grin.gov/gringlobal/accessiondetail.aspx?id=1245008
PI 329480	Shashamane	Ethiopia	Eastern Africa	7.203823, 38.608264	1900	1967	Cellulosic	Unknown	1	https://npgsweb.ars-grin.gov/gringlobal/accessiondetail.aspx?id=1245010
PI 329501	Arussi	Ethiopia	Eastern Africa	7.961704, 39.128227	2200	1967	Cellulosic	Unknown	1	https://npgsweb.ars-grin.gov/gringlobal/accessiondetail.aspx?id=1245031
PI 329506	Arussi	Ethiopia	Eastern Africa	7.961704, 39.128227	2200	1967	Cellulosic	Unknown	1	https://npgsweb.ars-grin.gov/gringlobal/accessiondetail.aspx?id=1245036
PI 329510	Adama	Ethiopia	Eastern Africa	8.528662, 39.258696	1700	1967	Cellulosic	Unknown	8	https://npgsweb.ars-grin.gov/gringlobal/accessiondetail.aspx?id=1245040
PI 329511	Adama	Ethiopia	Eastern Africa	8.528662, 39.258696	1700	1967	Sweet	Unknown	8	https://npgsweb.ars-grin.gov/gringlobal/accessiondetail.aspx?id=1245041
PI 329517	Bishoftu	Ethiopia	Eastern Africa	8.732396, 39.007552	1900	1967	Cellulosic	Unknown	1	https://npgsweb.ars-grin.gov/gringlobal/accessiondetail.aspx?id=1245047
PI 329519	Butajira	Ethiopia	Eastern Africa	8.116501, 38.375469	1900	1967	Cellulosic	Unknown	1	https://npgsweb.ars-grin.gov/gringlobal/accessiondetail.aspx?id=1245049
PI 329545	Welkite	Ethiopia	Eastern Africa	8.291111, 37.777044	1700	1967	Cellulosic	Unknown	1	https://npgsweb.ars-grin.gov/gringlobal/accessiondetail.aspx?id=1245075
PI 329550	Jimma	Ethiopia	Eastern Africa	7.67471, 36.836567	1900	1967	Cellulosic	Unknown	5	https://npgsweb.ars-grin.gov/gringlobal/accessiondetail.aspx?id=1245080
PI 329551	Jimma	Ethiopia	Eastern Africa	7.67518, 36.837801	1900	1967	Cellulosic	Unknown	1	https://npgsweb.ars-grin.gov/gringlobal/accessiondetail.aspx?id=1245081
PI 329554	Jimma	Ethiopia	Eastern Africa	7.67518, 36.837801	1900	1967	Cellulosic	Unknown	1	https://npgsweb.ars-grin.gov/gringlobal/accessiondetail.aspx?id=1245084
PI 329569	Asendabo	Ethiopia	Eastern Africa	7.773457, 37.228758	1740	1967	Cellulosic	Unknown	8	https://npgsweb.ars-grin.gov/gringlobal/accessiondetail.aspx?id=1245099
PI 329570	Agaro	Ethiopia	Eastern Africa	7.856069, 36.582676	1678	1967	Cellulosic	Unknown	1	https://npgsweb.ars-grin.gov/gringlobal/accessiondetail.aspx?id=1245100
PI 329573	Jimma	Ethiopia	Eastern Africa	7.67501, 36.839003	1724.95	1967	Cellulosic	Unknown	1	https://npgsweb.ars-grin.gov/gringlobal/accessiondetail.aspx?id=1245103
PI 329583	Jimma	Ethiopia	Eastern Africa	7.67501, 36.839003	1724.95	1967	Cellulosic	Unknown	1	https://npgsweb.ars-grin.gov/gringlobal/accessiondetail.aspx?id=1245113
PI 329584	Jimma	Ethiopia	Eastern Africa	7.67501, 36.839003	1724.95	1967	Cellulosic	Unknown	1	https://npgsweb.ars-grin.gov/gringlobal/accessiondetail.aspx?id=1245114
PI 329585	Jimma	Ethiopia	Eastern Africa	7.67501, 36.839003	1724.95	1967	Cellulosic	Unknown	1	https://npgsweb.ars-grin.gov/gringlobal/accessiondetail.aspx?id=1245115
PI 329605	Agere Hiywet	Ethiopia	Eastern Africa	8.983616, 37.859898	2101	1967	Cellulosic	Unknown	1	https://npgsweb.ars-grin.gov/gringlobal/accessiondetail.aspx?id=1245135
PI 329614		Ethiopia	Eastern Africa	9.145, 40.489673	2068.14	1967	Cellulosic	Unknown	1	https://npgsweb.ars-grin.gov/gringlobal/accessiondetail.aspx?id=1245144
PI 329615		Ethiopia	Eastern Africa	9.145, 40.489673	2068.14	1967	Cellulosic	Unknown	1	https://npgsweb.ars-grin.gov/gringlobal/accessiondetail.aspx?id=1245145
PI 329617		Ethiopia	Eastern Africa	9.145, 40.489673	2068.14	1967	Cellulosic	Unknown	1	https://npgsweb.ars-grin.gov/gringlobal/accessiondetail.aspx?id=1245147
PI 329644	Wollega	Ethiopia	Eastern Africa	9.081219, 36.582869	2107.35	1967	Cellulosic	Unknown	1	https://npgsweb.ars-grin.gov/gringlobal/accessiondetail.aspx?id=1245173
PI 329645	Shambu	Ethiopia	Eastern Africa	9.567698, 37.099199	2300	1967	Sweet	Unknown	1	https://npgsweb.ars-grin.gov/gringlobal/accessiondetail.aspx?id=1245174
PI 329646	Shambu	Ethiopia	Eastern Africa	9.567698, 37.099199	2300	1967	Cellulosic	Unknown	1	https://npgsweb.ars-grin.gov/gringlobal/accessiondetail.aspx?id=1245175
PI 329673	Wayu	Ethiopia	Eastern Africa	9.019954, 39.116777	2612	1967	Cellulosic	Unknown	1	https://npgsweb.ars-grin.gov/gringlobal/accessiondetail.aspx?id=1245202
PI 329699	Gambela	Ethiopia	Eastern Africa	7.866908, 33.826851	540	1967	Sweet	Unknown	6	https://npgsweb.ars-grin.gov/gringlobal/accessiondetail.aspx?id=1245228
PI 329702	Debre Birhan	Ethiopia	Eastern Africa	9.677074, 39.533959	2645	1967	Cellulosic	Unknown	1	https://npgsweb.ars-grin.gov/gringlobal/accessiondetail.aspx?id=1245231
PI 329710	Debre Sina	Ethiopia	Eastern Africa	9.85048, 39.763985	2100	1967	Cellulosic	Unknown	8	https://npgsweb.ars-grin.gov/gringlobal/accessiondetail.aspx?id=1245239
PI 329711	Debre Sina	Ethiopia	Eastern Africa	9.85048, 39.763985	2100	1967	Cellulosic	Unknown	6	https://npgsweb.ars-grin.gov/gringlobal/accessiondetail.aspx?id=1245240
PI 329841	Gorgora	Ethiopia	Eastern Africa	12.240211, 37.293569	1857	1967	Sweet	Unknown	5	https://npgsweb.ars-grin.gov/gringlobal/accessiondetail.aspx?id=1245370
PI 329843	Bahir Dar, Gojjam	Ethiopia	Eastern Africa	11.577984, 37.354329	1650	1967	Cellulosic	Unknown	1	https://npgsweb.ars-grin.gov/gringlobal/accessiondetail.aspx?id=1245372
PI 329864	Chancho	Ethiopia	Eastern Africa	9.307959, 38.754916	2600	1967	Sweet	Unknown	8	https://npgsweb.ars-grin.gov/gringlobal/accessiondetail.aspx?id=1245393
PI 329865	Chancho	Ethiopia	Eastern Africa	9.307959, 38.754916	2600	1967	Cellulosic	Unknown	8	https://npgsweb.ars-grin.gov/gringlobal/accessiondetail.aspx?id=1245394
PI 330122		Ethiopia	Eastern Africa	9.145, 40.489673	2068.14	1967	Grain	Unknown	1	https://npgsweb.ars-grin.gov/gringlobal/accessiondetail.aspx?id=1245651
PI 330167	Wollo	Ethiopia	Eastern Africa	10.933048, 39.124025	1600	1968	Cellulosic	Unknown	8	https://npgsweb.ars-grin.gov/gringlobal/accessiondetail.aspx?id=1245696
PI 330168	Weldiya	Ethiopia	Eastern Africa	11.830514, 39.599491	1600	1967	Cellulosic	Unknown	8	https://npgsweb.ars-grin.gov/gringlobal/accessiondetail.aspx?id=1245697
PI 330169	Weldiya	Ethiopia	Eastern Africa	11.830514, 39.599491	1600	1967	Sweet	Unknown	8	https://npgsweb.ars-grin.gov/gringlobal/accessiondetail.aspx?id=1245698
PI 330181	Kobo	Ethiopia	Eastern Africa	12.155286, 39.634429	1500	1967	Sweet	Unknown	8	https://npgsweb.ars-grin.gov/gringlobal/accessiondetail.aspx?id=1245710
PI 330182	Kobo	Ethiopia	Eastern Africa	12.155286, 39.634429	1500	1967	Sweet	Unknown	8	https://npgsweb.ars-grin.gov/gringlobal/accessiondetail.aspx?id=1245711
PI 330184	Alamata	Ethiopia	Eastern Africa	12.41983, 39.554866	1500	1967	Sweet	Unknown	8	https://npgsweb.ars-grin.gov/gringlobal/accessiondetail.aspx?id=1245713
PI 330185	Alamata	Ethiopia	Eastern Africa	12.41983, 39.554866	1500	1967	Sweet	Unknown	8	https://npgsweb.ars-grin.gov/gringlobal/accessiondetail.aspx?id=1245714
PI 330195	Freweyni	Ethiopia	Eastern Africa	14.053995, 39.571895	2467.59	1967	Sweet	Unknown	1	https://npgsweb.ars-grin.gov/gringlobal/accessiondetail.aspx?id=1245724
PI 330196	Wikro	Ethiopia	Eastern Africa	13.784981, 39.605405	2200	1967	Cellulosic	Unknown	1	https://npgsweb.ars-grin.gov/gringlobal/accessiondetail.aspx?id=1245725
PI 330199	Adigrat	Ethiopia	Eastern Africa	14.278688, 39.460766	2500	1967	Sweet	Unknown	5	https://npgsweb.ars-grin.gov/gringlobal/accessiondetail.aspx?id=1245728
PI 330796	Bolosso	Ethiopia	Eastern Africa	7.051688, 37.600166	1350	1968	Cellulosic	Unknown	6	https://npgsweb.ars-grin.gov/gringlobal/accessiondetail.aspx?id=1246225
PI 330803	Dembidolo	Ethiopia	Eastern Africa	8.533129, 34.802499	1560	1968	Cellulosic	Unknown	1	https://npgsweb.ars-grin.gov/gringlobal/accessiondetail.aspx?id=1246232
PI 330833	Arb Gebeya	Ethiopia	Eastern Africa	11.630269, 37.750336	2205	1968	Cellulosic	Unknown	1	https://npgsweb.ars-grin.gov/gringlobal/accessiondetail.aspx?id=1246262
PI 330858	Nekemte	Ethiopia	Eastern Africa	9.090396, 36.556536	1250	1968	Cellulosic	Unknown	1	https://npgsweb.ars-grin.gov/gringlobal/accessiondetail.aspx?id=1246287
PI 337680		Ethiopia	Eastern Africa	9.145, 40.489673	2068.14	1968	Cellulosic	Unknown	1	https://www.ars-grin.gov/npgs/pi_books/scans/176/pi176_357.pdf
PI 337689	Harar	Ethiopia	Eastern Africa	9.319739, 42.125003	1941	1968	Cellulosic	Unknown	1	https://npgsweb.ars-grin.gov/gringlobal/accessiondetail.aspx?id=1251604
PI 365512	KwaZulu-Natal	South Africa	Southern Africa	-29.725468, 31.045658	109.8	1971	Cellulosic	Caudatum	7	https://npgsweb.ars-grin.gov/gringlobal/accessiondetail.aspx?id=1273681
PI 452542		Ethiopia	Eastern Africa	9.145, 40.489673	2068.14	1980	Sweet	Durra	8	https://npgsweb.ars-grin.gov/gringlobal/accessiondetail.aspx?id=1347478
PI 452544		Ethiopia	Eastern Africa	9.145, 40.489673	2068.14	1980		Unknown	5	https://npgsweb.ars-grin.gov/gringlobal/accessiondetail.aspx?id=1347480
PI 452619		Ethiopia	Eastern Africa	9.145, 40.489673	2068.14	1980	Sweet	Guinea-durra	8	https://npgsweb.ars-grin.gov/gringlobal/accessiondetail.aspx?id=1347555
PI 452692		Ethiopia	Eastern Africa	9.145, 40.489673	2068.14	1980	Cellulosic	Durra	8	https://npgsweb.ars-grin.gov/gringlobal/accessiondetail.aspx?id=1347628
PI 453106		Ethiopia	Eastern Africa	9.145, 40.489673	2068.14	1980		Unknown	8	https://npgsweb.ars-grin.gov/gringlobal/accessiondetail.aspx?id=1348042
PI 453177		Ethiopia	Eastern Africa	9.145, 40.489673	2068.14	1980		Unknown	1	https://npgsweb.ars-grin.gov/gringlobal/accessiondetail.aspx?id=1348113
PI 453696		Ethiopia	Eastern Africa	9.145, 40.489673	2068.14	1980	Cellulosic	Durra	8	https://npgsweb.ars-grin.gov/gringlobal/accessiondetail.aspx?id=1348632
PI 455217		Ethiopia	Eastern Africa	9.145, 40.489673	2068.14	1980	Cellulosic	Durra	8	https://npgsweb.ars-grin.gov/gringlobal/accessiondetail.aspx?id=1350153
PI 455280		Ethiopia	Eastern Africa	9.145, 40.489673	2068.14	1980	Cellulosic	Durra-bicolor	1	https://npgsweb.ars-grin.gov/gringlobal/accessiondetail.aspx?id=1350216
PI 455301		Ethiopia	Eastern Africa	9.145, 40.489673	2068.14	1980	Cellulosic	Kafir-durra	8	https://npgsweb.ars-grin.gov/gringlobal/accessiondetail.aspx?id=1350237
PI 474825	Yarim	Yemen	Asia	14.297112, 44.376311	2800	1982		Unknown	5	https://npgsweb.ars-grin.gov/gringlobal/accessiondetail.aspx?id=1369761
PI 506030	Sotouboua	Togo	Western Africa	8.657656, 0.991209	406.81	1983	Cellulosic	Guinea	4	https://npgsweb.ars-grin.gov/gringlobal/accessiondetail.aspx?id=1400966
PI 511355	Texas	United States	North America	31.530739, -99.100537	405.66	1987	Sweet	Unknown	6	https://npgsweb.ars-grin.gov/gringlobal/accessiondetail.aspx?id=1406291
PI 513898		Benin	Western Africa	9.30769, 2.315834	302.09	1978	Cellulosic	Guinea	4	https://npgsweb.ars-grin.gov/gringlobal/accessiondetail.aspx?id=1408834
PI 514456		Senegal	Western Africa	14.497401, -14.452362	51.66	1976	Cellulosic	Guinea	4	https://npgsweb.ars-grin.gov/gringlobal/accessiondetail.aspx?id=1409392
PI 521019		Kenya	Eastern Africa	-0.023559, 37.906193	916.85	1978	Cellulosic	Durra-caudatum	6	https://npgsweb.ars-grin.gov/gringlobal/accessiondetail.aspx?id=1415955
PI 521152		Kenya	Eastern Africa	-0.023559, 37.906193	916.85	1978	Cellulosic	Caudatum	6	https://npgsweb.ars-grin.gov/gringlobal/accessiondetail.aspx?id=1416088
PI 521280		Kenya	Eastern Africa	-0.023559, 37.906193	916.85	1978	Cellulosic	Durra-bicolor	3	https://npgsweb.ars-grin.gov/gringlobal/accessiondetail.aspx?id=1416216
PI 521281	Meru	Kenya	Eastern Africa	0.05167, 37.645125	1681.55	1978		Bicolor	3	https://npgsweb.ars-grin.gov/gringlobal/accessiondetail.aspx?id=1416217
PI 521290		Kenya	Eastern Africa	-0.023559, 37.906193	916.85	1978	Sweet	Guinea-bicolor	3	https://npgsweb.ars-grin.gov/gringlobal/accessiondetail.aspx?id=1416226
PI 524475		Sudan	Eastern Africa	15.782216, 30.328306	473.05	1977	Cellulosic	Caudatum-bicolor	2	https://npgsweb.ars-grin.gov/gringlobal/accessiondetail.aspx?id=1419411
PI 525049		Malawi	Southern Africa	-13.254308, 34.301525	606.37	1980	Cellulosic	Guinea	3	https://npgsweb.ars-grin.gov/gringlobal/accessiondetail.aspx?id=1419985
PI 52606	Limpopo	South Africa	Southern Africa	-23.777743, 29.517486	1212.22	1921	Grain	Kafir	7	https://npgsweb.ars-grin.gov/gringlobal/accessiondetail.aspx?id=1108362
PI 526905		Zimbabwe	Southern Africa	-19.015438, 29.154857	1317.63	1985	Grain	Caudatum	6	https://npgsweb.ars-grin.gov/gringlobal/accessiondetail.aspx?id=1421841
PI 527045		Zimbabwe	Southern Africa	-19.015438, 29.154857	1317.63	1985	Grain	Caudatum	6	https://npgsweb.ars-grin.gov/gringlobal/accessiondetail.aspx?id=1421981
PI 533752		South Africa	Southern Africa	-30.559482, 22.937506	1329.33	1987		Unknown	6	https://npgsweb.ars-grin.gov/gringlobal/accessiondetail.aspx?id=1428688
PI 533759		Zimbabwe	Southern Africa	-19.015438, 29.154857	1317.63	1970		Unknown	6	https://npgsweb.ars-grin.gov/gringlobal/accessiondetail.aspx?id=1428695
PI 533792		Ethiopia	Eastern Africa	9.145, 40.489673	2068.14	1987		Unknown	6	https://npgsweb.ars-grin.gov/gringlobal/accessiondetail.aspx?id=1428728
PI 533863		Chad	Central Africa	15.454166, 18.732207	337.58	1974		Unknown	2	https://npgsweb.ars-grin.gov/gringlobal/accessiondetail.aspx?id=1428799
PI 533902		Ethiopia	Eastern Africa	9.145, 40.489673	2068.14	1987	Grain	Unknown	1	https://npgsweb.ars-grin.gov/gringlobal/accessiondetail.aspx?id=1428838
PI 533964		Sudan	Eastern Africa	15.782216, 30.328306	473.05	1987		Unknown	8	https://npgsweb.ars-grin.gov/gringlobal/accessiondetail.aspx?id=1428900
PI 533998		United States	North America	37.09024, -95.712891	1086.32	1987	Grain	Unknown	7	https://npgsweb.ars-grin.gov/gringlobal/accessiondetail.aspx?id=1428934
PI 534047	Texas	United States	North America	31.42875, -98.786777	417.64	1986		Unknown	6	https://npgsweb.ars-grin.gov/gringlobal/accessiondetail.aspx?id=1428983
PI 534120		Ethiopia	Eastern Africa	9.145, 40.489673	2068.14	1987	Grain	Unknown	1	https://npgsweb.ars-grin.gov/gringlobal/accessiondetail.aspx?id=1429056
PI 534157		Ethiopia	Eastern Africa	9.145, 40.489673	2068.14	1987		Unknown	8	https://npgsweb.ars-grin.gov/gringlobal/accessiondetail.aspx?id=1429093
PI 534165		Sudan	Eastern Africa	15.782216, 30.328306	473.05	1987	Grain	Unknown	6	https://npgsweb.ars-grin.gov/gringlobal/accessiondetail.aspx?id=1429101
PI 535783	Nebraska	United States	North America	41.495477, -99.487727	775.72	1989	Sweet	Unknown	7	https://npgsweb.ars-grin.gov/gringlobal/accessiondetail.aspx?id=1430719
PI 535785	Nebraska	United States	North America	41.495477, -99.487727	775.72	1989	Sweet	Unknown	7	https://npgsweb.ars-grin.gov/gringlobal/accessiondetail.aspx?id=1430721
PI 535792	Nebraska	United States	North America	41.495477, -99.487727	775.72	1989	Grain	Unknown	6	https://npgsweb.ars-grin.gov/gringlobal/accessiondetail.aspx?id=1430728
PI 535793	Nebraska	United States	North America	41.495477, -99.487727	775.72	1989	Sweet	Unknown	7	https://npgsweb.ars-grin.gov/gringlobal/accessiondetail.aspx?id=1430729
PI 535794	Nebraska	United States	North America	41.495477, -99.487727	775.72	1989	Grain	Unknown	7	https://npgsweb.ars-grin.gov/gringlobal/accessiondetail.aspx?id=1430730
PI 535795	Nebraska	United States	North America	41.495477, -99.487727	775.72	1989	Sweet	Unknown	7	https://npgsweb.ars-grin.gov/gringlobal/accessiondetail.aspx?id=1430731
PI 535796	Mississippi	United States	North America	33.499828, -89.735354	132.37	1989	Sweet	Unknown	7	https://npgsweb.ars-grin.gov/gringlobal/accessiondetail.aspx?id=1430732
PI 540518	Southern District	Botswana	Southern Africa	-25, 25	1238.98	1986	Cellulosic	Unknown	7	https://npgsweb.ars-grin.gov/gringlobal/accessiondetail.aspx?id=1435454
PI 542718	Shaanxi	China	Asia	35.643006, 109.225664	1022.62	1990	Grain	Unknown	5	https://npgsweb.ars-grin.gov/gringlobal/accessiondetail.aspx?id=1437654
PI 550604	Zernograd	Russia	Europe	46.849052, 40.313182	86.27	1991	Grain	Caudatum	3	https://npgsweb.ars-grin.gov/gringlobal/accessiondetail.aspx?id=1445540
PI 552851	Nebraska	United States	North America	41.446125, -99.57431	802.61	1991		Unknown	5	https://npgsweb.ars-grin.gov/gringlobal/accessiondetail.aspx?id=1447823
PI 561072	Texas	United States	North America	31.42875, -98.786777	417.64	1992	Grain	Unknown	6	https://npgsweb.ars-grin.gov/gringlobal/accessiondetail.aspx?id=1456044
PI 562717	Texas	United States	North America	31.530739, -99.100537	405.66	1992	Grain	Bicolor	5	https://npgsweb.ars-grin.gov/gringlobal/accessiondetail.aspx?id=1457688
PI 562732		Mexico	North America	23.634501, -102.552784	2075.25	1992	Sweet	Durra-caudatum	8	https://npgsweb.ars-grin.gov/gringlobal/accessiondetail.aspx?id=1457703
PI 562781	Bomako	Mali	Western Africa	12.639049, -8.003754	344.03	1992	Cellulosic	Guinea	4	https://npgsweb.ars-grin.gov/gringlobal/accessiondetail.aspx?id=1457752
PI 562897		Burkina Faso	Western Africa	12.238333, -1.561593	339.97	1992	Cellulosic	Guinea	3	https://npgsweb.ars-grin.gov/gringlobal/accessiondetail.aspx?id=1457868
PI 562970	Gombe	Nigeria	Western Africa	10.279023, 11.168943	450.99	1992	Cellulosic	Guinea	4	https://npgsweb.ars-grin.gov/gringlobal/accessiondetail.aspx?id=1457941
PI 562971		Nigeria	Western Africa	9.081999, 8.675277	762.13	1992	Cellulosic	Guinea	4	https://npgsweb.ars-grin.gov/gringlobal/accessiondetail.aspx?id=1457942
PI 562981	Egbe	Nigeria	Western Africa	8.219258, 5.506943	343.75	1992	Cellulosic	Guinea	4	https://npgsweb.ars-grin.gov/gringlobal/accessiondetail.aspx?id=1457952
PI 562982		Nigeria	Western Africa	9.081999, 8.675277	762.13	1992	Cellulosic	Guinea	4	https://npgsweb.ars-grin.gov/gringlobal/accessiondetail.aspx?id=1457953
PI 562990	Wase	Nigeria	Western Africa	9.094871, 9.960158	246.29	1992	Cellulosic	Guinea	4	https://npgsweb.ars-grin.gov/gringlobal/accessiondetail.aspx?id=1457961
PI 562991	Womba	Nigeria	Western Africa	8.94322, 8.602237	371.79	1992	Cellulosic	Guinea	4	https://npgsweb.ars-grin.gov/gringlobal/accessiondetail.aspx?id=1457962
PI 562994	Abuja	Nigeria	Western Africa	9.077361, 7.390917	444.18	1992	Cellulosic	Guinea	4	https://npgsweb.ars-grin.gov/gringlobal/accessiondetail.aspx?id=1457965
PI 562997	Lemu	Nigeria	Western Africa	9.399192, 6.031274	161.34	1992	Cellulosic	Guinea-caudatum	4	https://npgsweb.ars-grin.gov/gringlobal/accessiondetail.aspx?id=1457968
PI 562998	Kuchigi	Nigeria	Western Africa	9.046605, 5.931423	180.96	1992	Cellulosic	Guinea	4	https://npgsweb.ars-grin.gov/gringlobal/accessiondetail.aspx?id=1457969
PI 563002	Mokwa	Nigeria	Western Africa	11.000277, 7.842572	629.79	1992	Cellulosic	Guinea	4	https://npgsweb.ars-grin.gov/gringlobal/accessiondetail.aspx?id=1457973
PI 563009	Marwa	Nigeria	Western Africa	11.000277, 7.842572	629.79	1992	Cellulosic	Guinea-caudatum	4	https://npgsweb.ars-grin.gov/gringlobal/accessiondetail.aspx?id=1457980
PI 563020		Nigeria	Western Africa	9.081999, 8.675277	762.13	1992	Cellulosic	Guinea	4	https://npgsweb.ars-grin.gov/gringlobal/accessiondetail.aspx?id=1457991
PI 563021	Babana	Nigeria	Western Africa	10.436602, 3.817443	300.79	1992	Cellulosic	Guinea	4	https://npgsweb.ars-grin.gov/gringlobal/accessiondetail.aspx?id=1457992
PI 563022	Babana	Nigeria	Western Africa	10.436602, 3.817443	300.79	1992	Cellulosic	Guinea	4	https://npgsweb.ars-grin.gov/gringlobal/accessiondetail.aspx?id=1457993
PI 563032		Japan	Asia	36.204824, 138.252924	606.05	1992	Sweet	Bicolor	5	https://npgsweb.ars-grin.gov/gringlobal/accessiondetail.aspx?id=1458003
PI 563196	Kisumu	Kenya	Eastern Africa	-0.092825, 34.770435	1151.46	1992	Cellulosic	Guinea-caudatum	6	https://npgsweb.ars-grin.gov/gringlobal/accessiondetail.aspx?id=1458167
PI 563329	Bishoftu	Ethiopia	Eastern Africa	8.732396, 39.007552	1900	1992	Sweet	Durra-caudatum	5	https://npgsweb.ars-grin.gov/gringlobal/accessiondetail.aspx?id=1458300
PI 563332	Bishoftu	Ethiopia	Eastern Africa	8.732396, 39.007552	1900	1992	Cellulosic	Durra	8	https://npgsweb.ars-grin.gov/gringlobal/accessiondetail.aspx?id=1458303
PI 563338		Burkina Faso	Western Africa	12.238333, -1.561593	339.97	1992	Cellulosic	Guinea	4	https://npgsweb.ars-grin.gov/gringlobal/accessiondetail.aspx?id=1458309
PI 563348		Burkina Faso	Western Africa	12.238333, -1.561593	339.97	1992	Cellulosic	Guinea	8	https://npgsweb.ars-grin.gov/gringlobal/accessiondetail.aspx?id=1458319
PI 563350		Burkina Faso	Western Africa	12.238333, -1.561593	339.97	1992	Cellulosic	Guinea	4	https://npgsweb.ars-grin.gov/gringlobal/accessiondetail.aspx?id=1458321
PI 563355		Burkina Faso	Western Africa	12.238333, -1.561593	339.97	1992	Cellulosic	Guinea-caudatum	4	https://npgsweb.ars-grin.gov/gringlobal/accessiondetail.aspx?id=1458326
PI 564163		United States	North America	37.09024, -95.712891	1086.32	1992	Grain	Unknown	7	https://npgsweb.ars-grin.gov/gringlobal/accessiondetail.aspx?id=1459134
PI 566819	Virginia	United States	North America	37.273488, -78.92121	194.58	1993	Sweet	Unknown	7	https://npgsweb.ars-grin.gov/gringlobal/accessiondetail.aspx?id=1461790
PI 568717		Cameroon	Central Africa	7.369722, 12.354722	715.85	1993	Cellulosic	Durra-caudatum	2	https://npgsweb.ars-grin.gov/gringlobal/accessiondetail.aspx?id=1463688
PI 569097	Al Jazirah	Sudan	Eastern Africa	14.392719, 33.536018	403.8	1993	Cellulosic	Durra	8	https://npgsweb.ars-grin.gov/gringlobal/accessiondetail.aspx?id=1464068
PI 569148	Al Jazirah	Sudan	Eastern Africa	14.392719, 33.536018	403.8	1993	Sweet	Durra-bicolor	8	https://npgsweb.ars-grin.gov/gringlobal/accessiondetail.aspx?id=1464119
PI 569244	Al Jazirah	Sudan	Eastern Africa	14.392719, 33.536018	403.8	1993	Sweet	Durra-caudatum	8	https://npgsweb.ars-grin.gov/gringlobal/accessiondetail.aspx?id=1464215
PI 569264	Al Jazirah	Sudan	Eastern Africa	14.392719, 33.536018	403.8	1993	Cellulosic	Caudatum-bicolor	8	https://npgsweb.ars-grin.gov/gringlobal/accessiondetail.aspx?id=1464235
PI 569416		Sudan	Eastern Africa	15.782216, 30.328306	473.05	1993	Cellulosic	Caudatum	2	https://npgsweb.ars-grin.gov/gringlobal/accessiondetail.aspx?id=1464387
PI 569418		Sudan	Eastern Africa	15.782216, 30.328306	473.05	1993	Cellulosic	Guinea-caudatum	2	https://npgsweb.ars-grin.gov/gringlobal/accessiondetail.aspx?id=1464389
PI 569419		Sudan	Eastern Africa	15.782216, 30.328306	473.05	1993	Cellulosic	Caudatum	2	https://npgsweb.ars-grin.gov/gringlobal/accessiondetail.aspx?id=1464390
PI 569420		Sudan	Eastern Africa	15.782216, 30.328306	473.05	1993	Cellulosic	Guinea-caudatum	2	https://npgsweb.ars-grin.gov/gringlobal/accessiondetail.aspx?id=1464391
PI 569422		Sudan	Eastern Africa	15.782216, 30.328306	473.05	1993	Cellulosic	Caudatum	2	https://npgsweb.ars-grin.gov/gringlobal/accessiondetail.aspx?id=1464393
PI 569423		Sudan	Eastern Africa	15.782216, 30.328306	473.05	1993	Cellulosic	Guinea-caudatum	2	https://npgsweb.ars-grin.gov/gringlobal/accessiondetail.aspx?id=1464394
PI 569425		Sudan	Eastern Africa	15.782216, 30.328306	473.05	1993	Cellulosic	Caudatum	2	https://npgsweb.ars-grin.gov/gringlobal/accessiondetail.aspx?id=1464396
PI 569427		Sudan	Eastern Africa	15.782216, 30.328306	473.05	1993	Cellulosic	Caudatum	2	https://npgsweb.ars-grin.gov/gringlobal/accessiondetail.aspx?id=1464398
PI 569433		Sudan	Eastern Africa	15.782216, 30.328306	473.05	1993	Cellulosic	Caudatum	2	https://npgsweb.ars-grin.gov/gringlobal/accessiondetail.aspx?id=1464404
PI 569435		Sudan	Eastern Africa	15.782216, 30.328306	473.05	1993	Cellulosic	Guinea-caudatum	2	https://npgsweb.ars-grin.gov/gringlobal/accessiondetail.aspx?id=1464406
PI 569443		Sudan	Eastern Africa	15.782216, 30.328306	473.05	1993	Cellulosic	Kafir-caudatum	2	https://npgsweb.ars-grin.gov/gringlobal/accessiondetail.aspx?id=1464414
PI 569445		Sudan	Eastern Africa	15.782216, 30.328306	473.05	1993	Cellulosic	Guinea-caudatum	3	https://npgsweb.ars-grin.gov/gringlobal/accessiondetail.aspx?id=1464416
PI 569446		Sudan	Eastern Africa	15.782216, 30.328306	473.05	1993		Unknown	2	https://npgsweb.ars-grin.gov/gringlobal/accessiondetail.aspx?id=1464417
PI 569447		Sudan	Eastern Africa	15.782216, 30.328306	473.05	1993	Cellulosic	Caudatum	2	https://npgsweb.ars-grin.gov/gringlobal/accessiondetail.aspx?id=1464418
PI 569453		Sudan	Eastern Africa	15.782216, 30.328306	473.05	1993	Cellulosic	Guinea-caudatum	2	https://npgsweb.ars-grin.gov/gringlobal/accessiondetail.aspx?id=1464424
PI 569454		Sudan	Eastern Africa	15.782216, 30.328306	473.05	1993	Cellulosic	Guinea-caudatum	3	https://npgsweb.ars-grin.gov/gringlobal/accessiondetail.aspx?id=1464425
PI 569455		Sudan	Eastern Africa	15.782216, 30.328306	473.05	1993	Cellulosic	Guinea-caudatum	3	https://npgsweb.ars-grin.gov/gringlobal/accessiondetail.aspx?id=1464426
PI 569457		Sudan	Eastern Africa	15.782216, 30.328306	473.05	1993	Cellulosic	Caudatum	2	https://npgsweb.ars-grin.gov/gringlobal/accessiondetail.aspx?id=1464428
PI 569458		Sudan	Eastern Africa	15.782216, 30.328306	473.05	1993	Cellulosic	Caudatum	2	https://npgsweb.ars-grin.gov/gringlobal/accessiondetail.aspx?id=1464429
PI 569459		Sudan	Eastern Africa	15.782216, 30.328306	473.05	1993	Cellulosic	Caudatum	2	https://npgsweb.ars-grin.gov/gringlobal/accessiondetail.aspx?id=1464430
PI 569460		Sudan	Eastern Africa	15.782216, 30.328306	473.05	1993	Cellulosic	Caudatum	2	https://npgsweb.ars-grin.gov/gringlobal/accessiondetail.aspx?id=1464431
PI 569465		Sudan	Eastern Africa	15.782216, 30.328306	473.05	1993	Cellulosic	Caudatum	2	https://npgsweb.ars-grin.gov/gringlobal/accessiondetail.aspx?id=1464436
PI 569886		Sudan	Eastern Africa	15.782216, 30.328306	473.05	1993	Cellulosic	Guinea-caudatum	5	https://npgsweb.ars-grin.gov/gringlobal/accessiondetail.aspx?id=1464857
PI 570031		Sudan	Eastern Africa	15.782216, 30.328306	473.05	1993	Cellulosic	Guinea-caudatum	2	https://npgsweb.ars-grin.gov/gringlobal/accessiondetail.aspx?id=1465002
PI 570042		Sudan	Eastern Africa	15.782216, 30.328306	473.05	1993	Cellulosic	Guinea-caudatum	2	https://npgsweb.ars-grin.gov/gringlobal/accessiondetail.aspx?id=1465013
PI 570053		Sudan	Eastern Africa	15.782216, 30.328306	473.05	1993	Cellulosic	Caudatum	6	https://npgsweb.ars-grin.gov/gringlobal/accessiondetail.aspx?id=1465024
PI 570071		Sudan	Eastern Africa	15.782216, 30.328306	473.05	1993	Cellulosic	Guinea-caudatum	3	https://npgsweb.ars-grin.gov/gringlobal/accessiondetail.aspx?id=1465042
PI 570073		Sudan	Eastern Africa	15.782216, 30.328306	473.05	1993	Cellulosic	Guinea-caudatum	2	https://npgsweb.ars-grin.gov/gringlobal/accessiondetail.aspx?id=1465044
PI 570074		Sudan	Eastern Africa	15.782216, 30.328306	473.05	1993	Cellulosic	Guinea-caudatum	2	https://npgsweb.ars-grin.gov/gringlobal/accessiondetail.aspx?id=1465045
PI 570075		Sudan	Eastern Africa	15.782216, 30.328306	473.05	1993	Cellulosic	Guinea-caudatum	2	https://npgsweb.ars-grin.gov/gringlobal/accessiondetail.aspx?id=1465046
PI 570076		Sudan	Eastern Africa	15.782216, 30.328306	473.05	1993	Cellulosic	Guinea	2	https://npgsweb.ars-grin.gov/gringlobal/accessiondetail.aspx?id=1465047
PI 570085		Sudan	Eastern Africa	15.782216, 30.328306	473.05	1993	Cellulosic	Guinea-caudatum	2	https://npgsweb.ars-grin.gov/gringlobal/accessiondetail.aspx?id=1465056
PI 570087		Sudan	Eastern Africa	15.782216, 30.328306	473.05	1993	Cellulosic	Guinea-caudatum	2	https://npgsweb.ars-grin.gov/gringlobal/accessiondetail.aspx?id=1465058
PI 570090		Sudan	Eastern Africa	15.782216, 30.328306	473.05	1993	Cellulosic	Guinea-caudatum	2	https://npgsweb.ars-grin.gov/gringlobal/accessiondetail.aspx?id=1465061
PI 570091		Sudan	Eastern Africa	15.782216, 30.328306	473.05	1993	Cellulosic	Guinea-caudatum	2	https://npgsweb.ars-grin.gov/gringlobal/accessiondetail.aspx?id=1465062
PI 570096		Sudan	Eastern Africa	15.782216, 30.328306	473.05	1993	Cellulosic	Guinea-caudatum	3	https://npgsweb.ars-grin.gov/gringlobal/accessiondetail.aspx?id=1465067
PI 570106		Sudan	Eastern Africa	15.782216, 30.328306	473.05	1993	Cellulosic	Guinea-caudatum	2	https://npgsweb.ars-grin.gov/gringlobal/accessiondetail.aspx?id=1465077
PI 570110		Sudan	Eastern Africa	15.782216, 30.328306	473.05	1993	Cellulosic	Guinea-caudatum	2	https://npgsweb.ars-grin.gov/gringlobal/accessiondetail.aspx?id=1465081
PI 570114		Sudan	Eastern Africa	15.782216, 30.328306	473.05	1993	Cellulosic	Guinea	3	https://npgsweb.ars-grin.gov/gringlobal/accessiondetail.aspx?id=1465085
PI 570145		Sudan	Eastern Africa	15.782216, 30.328306	473.05	1993	Cellulosic	Guinea-caudatum	6	https://npgsweb.ars-grin.gov/gringlobal/accessiondetail.aspx?id=1465116
PI 570371		Sudan	Eastern Africa	15.782216, 30.328306	473.05	1993	Cellulosic	Guinea-caudatum	2	https://npgsweb.ars-grin.gov/gringlobal/accessiondetail.aspx?id=1465342
PI 570373	Torit	South Sudan	Eastern Africa	4.410009, 32.572389	610.94	1993	Cellulosic	Guinea-caudatum	3	https://npgsweb.ars-grin.gov/gringlobal/accessiondetail.aspx?id=1465344
PI 570388	Ikotos	Sudan	Eastern Africa	4.078333, 33.108889	925.95	1993	Sweet	Guinea	2	https://npgsweb.ars-grin.gov/gringlobal/accessiondetail.aspx?id=1465359
PI 570393	Katire	Sudan	Eastern Africa	4.04172, 32.79585	1172	1993	Cellulosic	Caudatum	2	https://npgsweb.ars-grin.gov/gringlobal/accessiondetail.aspx?id=1465364
PI 570400		Sudan	Eastern Africa	15.782216, 30.328306	473.05	1993	Cellulosic	Guinea-caudatum	3	https://npgsweb.ars-grin.gov/gringlobal/accessiondetail.aspx?id=1465371
PI 570431		Sudan	Eastern Africa	15.782216, 30.328306	473.05	1993	Sweet	Durra	8	https://npgsweb.ars-grin.gov/gringlobal/accessiondetail.aspx?id=1465402
PI 573193		Sudan	Eastern Africa	15.782216, 30.328306	473.05	1993	Cellulosic	Caudatum	2	https://npgsweb.ars-grin.gov/gringlobal/accessiondetail.aspx?id=1468164
PI 576366		India	Asia	20.593684, 78.96288	476.2	1992		Unknown	5	https://npgsweb.ars-grin.gov/gringlobal/accessiondetail.aspx?id=1471337
PI 576399		United States	North America	37.09024, -95.712891	1086.32	1992	Sweet	Unknown	3	https://npgsweb.ars-grin.gov/gringlobal/accessiondetail.aspx?id=1471370
PI 576401		India	Asia	20.593684, 78.96288	476.2	1992	Grain	Unknown	5	https://npgsweb.ars-grin.gov/gringlobal/accessiondetail.aspx?id=1471372
PI 583832		United States	North America	37.09024, -95.712891	1086.32	2008	Sweet	Unknown	6	https://npgsweb.ars-grin.gov/gringlobal/accessiondetail.aspx?id=1478858
PI 585406		Nigeria	Western Africa	9.081999, 8.675277	762.13	1993	Cellulosic	Guinea	4	https://npgsweb.ars-grin.gov/gringlobal/accessiondetail.aspx?id=1041741
PI 585448		Ghana	Western Africa	7.946527, -1.023194	107.53	1993	Cellulosic	Guinea	4	https://npgsweb.ars-grin.gov/gringlobal/accessiondetail.aspx?id=1041868
PI 585452		Ghana	Western Africa	7.946527, -1.023194	107.53	1993	Cellulosic	Guinea	4	https://npgsweb.ars-grin.gov/gringlobal/accessiondetail.aspx?id=1041880
PI 585454		Ghana	Western Africa	7.946527, -1.023194	107.53	1993	Cellulosic	Guinea	4	https://npgsweb.ars-grin.gov/gringlobal/accessiondetail.aspx?id=1041887
PI 585461		Ghana	Western Africa	7.946527, -1.023194	107.53	1993	Cellulosic	Guinea	4	https://npgsweb.ars-grin.gov/gringlobal/accessiondetail.aspx?id=1041906
PI 585467		Ghana	Western Africa	7.946527, -1.023194	107.53	1993	Cellulosic	Guinea	4	https://npgsweb.ars-grin.gov/gringlobal/accessiondetail.aspx?id=1041928
PI 585577		Burundi	Central Africa	-3.373056, 29.918886	1639.64	1993	Cellulosic	Durra-caudatum	3	https://npgsweb.ars-grin.gov/gringlobal/accessiondetail.aspx?id=1042303
PI 585608	Kigali	Rwanda	Eastern Africa	-1.944862, 30.058574	1495.08	1993	Cellulosic	Caudatum	3	https://npgsweb.ars-grin.gov/gringlobal/accessiondetail.aspx?id=1042420
PI 585961	Sotouboua	Togo	Western Africa	8.657656, 0.991209	406.81	1993	Cellulosic	Guinea	4	https://npgsweb.ars-grin.gov/gringlobal/accessiondetail.aspx?id=1043901
PI 585966	Sotouboua	Togo	Western Africa	8.657656, 0.991209	406.81	1993	Cellulosic	Guinea	4	https://npgsweb.ars-grin.gov/gringlobal/accessiondetail.aspx?id=1043920
PI 586499		South Africa	Southern Africa	-30.559482, 22.937506	1329.33	1993	Grain	Unknown	5	https://npgsweb.ars-grin.gov/gringlobal/accessiondetail.aspx?id=1046189
PI 586541		Australia	Australia	-25.274398, 133.775136	232.18	1995	Sweet	Caudatum-bicolor	7	https://npgsweb.ars-grin.gov/gringlobal/accessiondetail.aspx?id=1483810
PI 593916	Texas	United States	North America	31.42875, -98.786777	417.64	1995	Sweet	Unknown	7	https://npgsweb.ars-grin.gov/gringlobal/accessiondetail.aspx?id=1518811
PI 595699	Texas	United States	North America	31.42875, -98.786777	417.64	1996		Unknown	5	https://npgsweb.ars-grin.gov/gringlobal/accessiondetail.aspx?id=1531800
PI 595741	Texas	United States	North America	31.530739, -99.100537	405.66	1996		Unknown	3	https://npgsweb.ars-grin.gov/gringlobal/accessiondetail.aspx?id=1531845
PI 606706	Georgia	United States	North America	32.621071, -83.38876	148.89	1998	Cellulosic	Kafir	7	https://npgsweb.ars-grin.gov/gringlobal/accessiondetail.aspx?id=1569606
PI 619807		Uganda	Eastern Africa	1.373333, 32.290275	1042.38	2001	Sweet	Unknown	6	https://npgsweb.ars-grin.gov/gringlobal/accessiondetail.aspx?id=1628852
PI 619838		Uganda	Eastern Africa	1.373333, 32.290275	1042.38	2001	Cellulosic	Unknown	2	https://npgsweb.ars-grin.gov/gringlobal/accessiondetail.aspx?id=1628871
PI 620072		Uganda	Eastern Africa	1.373333, 32.290275	1042.38	2001	Cellulosic	Unknown	3	https://npgsweb.ars-grin.gov/gringlobal/accessiondetail.aspx?id=1628465
PI 629059	Texas	United States	North America	31.530739, -99.100537	405.66	2002		Unknown	7	https://npgsweb.ars-grin.gov/gringlobal/accessiondetail.aspx?id=1632652
PI 641810		United States	North America	37.09024, -95.712891	1086.32	1983	Sweet	Unknown	7	https://npgsweb.ars-grin.gov/gringlobal/accessiondetail.aspx?id=1610865
PI 641815		United States	North America	37.09024, -95.712891	1086.32	1983	Sweet	Unknown	7	https://npgsweb.ars-grin.gov/gringlobal/accessiondetail.aspx?id=1610916
PI 641817	Mississippi	United States	North America	33.499828, -89.735354	132.37	1983	Sweet	Unknown	7	https://npgsweb.ars-grin.gov/gringlobal/accessiondetail.aspx?id=1610936
PI 641821	Mississippi	United States	North America	33.499828, -89.735354	132.37	1983	Cellulosic	Unknown	7	https://npgsweb.ars-grin.gov/gringlobal/accessiondetail.aspx?id=1610964
PI 641824	Mississippi	United States	North America	33.499828, -89.735354	132.37	1983	Sweet	Unknown	7	https://npgsweb.ars-grin.gov/gringlobal/accessiondetail.aspx?id=1610967
PI 641829	Mississippi	United States	North America	33.499828, -89.735354	132.37	1983	Sweet	Unknown	7	https://npgsweb.ars-grin.gov/gringlobal/accessiondetail.aspx?id=1610972
PI 641830	Mississippi	United States	North America	33.499828, -89.735354	132.37	1983	Sweet	Unknown	7	https://npgsweb.ars-grin.gov/gringlobal/accessiondetail.aspx?id=1610973
PI 641834		United States	North America	37.09024, -95.712891	1086.32	1983		Unknown	7	https://npgsweb.ars-grin.gov/gringlobal/accessiondetail.aspx?id=1610979
PI 641835	Mississippi	United States	North America	33.499828, -89.735354	132.37	1983	Sweet	Unknown	7	https://npgsweb.ars-grin.gov/gringlobal/accessiondetail.aspx?id=1610980
PI 641850	Mississippi	United States	North America	33.499828, -89.735354	132.37	1983	Sweet	Unknown	7	https://npgsweb.ars-grin.gov/gringlobal/accessiondetail.aspx?id=1611221
PI 641860	Mississippi	United States	North America	33.499828, -89.735354	132.37	1983	Sweet	Unknown	7	https://npgsweb.ars-grin.gov/gringlobal/accessiondetail.aspx?id=1611470
PI 641862	Mississippi	United States	North America	33.499828, -89.735354	132.37	1983	Sweet	Unknown	7	https://npgsweb.ars-grin.gov/gringlobal/accessiondetail.aspx?id=1611472
PI 641892	Mississippi	United States	North America	33.499828, -89.735354	132.37	1983	Cellulosic	Unknown	7	https://npgsweb.ars-grin.gov/gringlobal/accessiondetail.aspx?id=1611893
PI 641909		Sudan	Eastern Africa	15.782216, 30.328306	473.05	1946	Cellulosic	Unknown	6	https://npgsweb.ars-grin.gov/gringlobal/accessiondetail.aspx?id=1613190
PI 646242		Uganda	Eastern Africa	1.373333, 32.290275	1042.38	2006	Cellulosic	Unknown	2	https://npgsweb.ars-grin.gov/gringlobal/accessiondetail.aspx?id=1711677
PI 646251		Uganda	Eastern Africa	1.373333, 32.290275	1042.38	2006	Cellulosic	Unknown	2	https://npgsweb.ars-grin.gov/gringlobal/accessiondetail.aspx?id=1711686
PI 651491	Georgia	United States	North America	32.621071, -83.38876	148.89	1984	Sweet	Unknown	7	https://npgsweb.ars-grin.gov/gringlobal/accessiondetail.aspx?id=1161258
PI 651493	Mississippi	United States	North America	33.499828, -89.735354	132.37	1980	Sweet	Unknown	6	https://npgsweb.ars-grin.gov/gringlobal/accessiondetail.aspx?id=1128803
PI 651495	Mississippi	United States	North America	33.499828, -89.735354	132.37	1970	Sweet	Unknown	7	https://npgsweb.ars-grin.gov/gringlobal/accessiondetail.aspx?id=1116947
PI 651497	Mississippi	United States	North America	33.499828, -89.735354	132.37	1978	Sweet	Unknown	3	https://npgsweb.ars-grin.gov/gringlobal/accessiondetail.aspx?id=1004428
PI 653411	Mississippi	United States	North America	33.449527, -89.557492	112.63	1983	Sweet	Unknown	3	https://npgsweb.ars-grin.gov/gringlobal/accessiondetail.aspx?id=1151393
PI 653616	Mississippi	United States	North America	33.499828, -89.735354	132.37	1981	Sweet	Unknown	7	https://npgsweb.ars-grin.gov/gringlobal/accessiondetail.aspx?id=1131537
PI 653617	Mississippi	United States	North America	33.499828, -89.735354	132.37	1982	Sweet	Unknown	5	https://npgsweb.ars-grin.gov/gringlobal/accessiondetail.aspx?id=1142721
PI 655978	Texas	United States	North America	31.530739, -99.100537	405.66	1982	Grain	Unknown	3	https://npgsweb.ars-grin.gov/gringlobal/accessiondetail.aspx?id=1004628
PI 655981		Mali	Western Africa	17.570692, -3.996166	291.11	1989	Cellulosic	Unknown	4	https://npgsweb.ars-grin.gov/gringlobal/accessiondetail.aspx?id=1007711
PI 655986	Texas	United States	North America	31.530739, -99.100537	405.66	1960	Grain	Kafir	7	https://npgsweb.ars-grin.gov/gringlobal/accessiondetail.aspx?id=1026545
PI 655988	Texas	United States	North America	31.530739, -99.100537	405.66	1960	Grain	Unknown	7	https://npgsweb.ars-grin.gov/gringlobal/accessiondetail.aspx?id=1026585
PI 655995	Illinois	United States	North America	40.18925, -89.476656	171.85	1969	Grain	Unknown	5	https://npgsweb.ars-grin.gov/gringlobal/accessiondetail.aspx?id=1116082
PI 655999	Texas	United States	North America	31.530739, -99.100537	405.66	1982	Sweet	Unknown	3	https://npgsweb.ars-grin.gov/gringlobal/accessiondetail.aspx?id=1152631
PI 656015		Sudan	Eastern Africa	15.782216, 30.328306	473.05	2009	Sweet	Unknown	2	https://npgsweb.ars-grin.gov/gringlobal/accessiondetail.aspx?id=1795254
PI 656021		United States	North America	37.09024, -95.712891	1086.32	2009		Unknown	7	https://npgsweb.ars-grin.gov/gringlobal/accessiondetail.aspx?id=1795260
PI 656025		China	Asia	35.86166, 104.195397	3011.6	2009	Grain	Unknown	6	https://npgsweb.ars-grin.gov/gringlobal/accessiondetail.aspx?id=1795264
PI 656035	Tchirozerine	Niger	Western Africa	17.39148, 9.562028	605.27	2009	Cellulosic	Unknown	6	https://npgsweb.ars-grin.gov/gringlobal/accessiondetail.aspx?id=1795274
PI 656044		South Africa	Southern Africa	-30.559482, 22.937506	1329.33	2009		Unknown	6	https://npgsweb.ars-grin.gov/gringlobal/accessiondetail.aspx?id=1795283
PI 656050		United States	North America	37.09024, -95.712891	1086.32	2009		Unknown	6	https://npgsweb.ars-grin.gov/gringlobal/accessiondetail.aspx?id=1795289
PI 656056	Indiana	United States	North America	40.199515, -86.189999	281.41	2009		Unknown	6	https://npgsweb.ars-grin.gov/gringlobal/accessiondetail.aspx?id=1795295
PI 656065		United States	North America	37.09024, -95.712891	1086.32	2009	Cellulosic	Unknown	2	https://npgsweb.ars-grin.gov/gringlobal/accessiondetail.aspx?id=1795304
PI 92270	Ning'an	China	Asia	44.170796, 129.222674	311.7	1931	Sweet	Unknown	5	https://npgsweb.ars-grin.gov/gringlobal/accessiondetail.aspx?id=1125511
Rio	Texas	United States	North America	31.530739, -99.100537	405.66	1965	Sweet	Unknown	6	https://npgsweb.ars-grin.gov/gringlobal/accessiondetail.aspx?id=1104830

## Sheet: Supplement table 2
Supplement table 2 Previously reported SVs in Sorghums
Affected phenotypes	Affected genes	Chromosomes	Gene starts	Gene ends	SV types	Gene IDs	SV start	SV end	Our called SVs overlapping with known SVs from the most filtered step	The further filtering step our called SVs overlapping known SVs	Citations
Dwarf	Dw3	Chr07	59821905	59829910	duplication	Sobic.007G163800	59825549	59826431	Chr07_59790312_59870954_DEL& Chr07_59826029_59826272_DEL	Size less than 100kb	Multani et al. 2003
Pithy/juicy stem	Dry	Chr06	50896169	50898604	insertion	Sobic.006G147400	50890669	50893669	Chr06_50892161_50892253_DEL	Missing SV frequency less than 0.2	Zhou et al. 2018
		Chr06	50896169	50898604	insertion	Sobic.006G147400	50899969	50900369	Chr06_50894772_50894832_DEL	Size less than 100kb
		Chr06	50896169	50898604	deletion	Sobic.006G147400	50885869	50899769	Chr06_50892161_50892253_DEL	Missing SV frequency less than 0.2
Tannin	Tan1	Chr04	62315396	62318779	deletion	Sobic.004G280800	62315628	62316585	95 huge deletions (mean = 2.9Mb)	No BND	Wu et al. 2019
	Tan2	Chr02	7975937	7985221	insertion	Sobic.002G076600	7983482	7991517	Chr02_7984220_7988701_DEL& Chr02_7990477_7990569_DEL	Missing SV frequency less than 0.2
Flowering time	Ma6	Chr06	697459	700101	exon indel	Sobic.006G004400	697527	698086	Chr06_661978_701259_DEL	Missing SV frequency less than 0.2	Li et al. 2018
	Ma1	Chr06	40304883	40316799	exon indel	Sobic.006G057866	40312129	40312788	102 huge deletions (mean = 3.4Mb)	No BND
	Elf3*	Chr09	59155166	59160131	promoter indel	Sobic.009G257300	59145520	59152920	Chr09_59145680_59153091_DEL	Minor SV frequency more than 0.05
* means overlaps with our called deletion from the most filtered step

## Sheet: Supplement table 3
Supplement table 3 Abundance of deletions occured in each cluster (counts/total regarding missing value) that showed cluster-specific seperation (>= 0.7 abundance, significant Chi-square test, and pass permutation test < 50 from 1000) and their affected genes (over CDS regions) and annotations.
SV ID	Cluster 1	Cluster 2	Cluster 3	Cluster 4	Cluster 5	Cluster 6	Cluster 7	Cluster 8	P-value from Chi-square test	Number of permutation (threshold over 5 from 100 times)	Unique to cluster	Types of mutation	Affected genes	Impact levels	Annotation
Chr01_1197733_1198053_DEL	0.15 (3/34)	0 (0/35)	0 (0/31)	0 (0/25)	0.05 (1/32)	0 (0/49)	0 (0/39)	0.8 (16/34)	1.837e-16	0	8	upstream_gene_variant	Sobic.001G012700	MODIFIER	regulatory protein
Chr01_12149620_12149784_DEL	0 (0/36)	0 (0/37)	0.12 (2/32)	0.88 (15/25)	0 (0/32)	0 (0/40)	0 (0/46)	0 (0/32)	1.28758e-25	0	4	upstream_gene_variant	Sobic.001G151300	MODIFIER	pentatricopeptide
Chr01_12709587_12709731_DEL	0 (0/37)	0 (0/42)	0 (0/34)	0 (0/26)	0.13 (2/32)	0 (0/46)	0 (0/49)	0.87 (13/30)	2.0679e-18	0	8	upstream_gene_variant	Sobic.001G157300	MODIFIER	expressed protein
Chr01_13232145_13232291_DEL	0.88 (23/32)	0 (0/42)	0 (0/33)	0 (0/27)	0.12 (3/35)	0 (0/46)	0 (0/49)	0 (0/37)	5.57066e-33	0	1	3_prime_UTR_variant	Sobic.001G160800	MODIFIER	integral membrane protein DUF6 containing protein
Chr01_13237062_13237134_DEL	0.8 (16/21)	0 (0/40)	0 (0/36)	0 (0/27)	0.15 (3/34)	0.05 (1/45)	0 (0/49)	0 (0/35)	5.08101e-31	0	1	upstream_gene_variant	Sobic.001G161000	MODIFIER	AGG2
Chr01_13333190_13333343_DEL	0.78 (21/32)	0.07 (2/40)	0 (0/29)	0 (0/27)	0.07 (2/38)	0.07 (2/44)	0 (0/46)	0 (0/33)	1.31019e-23	0	1	upstream_gene_variant	Sobic.001G161900	MODIFIER	zinc finger, C3HC4 type domain containing protein
Chr01_13528593_13529903_DEL	0.88 (30/38)	0 (0/36)	0 (0/29)	0 (0/30)	0.12 (4/36)	0 (0/54)	0 (0/50)	0 (0/35)	2.1021e-36	0	1	upstream_gene_variant	Sobic.001G163732	MODIFIER	hypothetical protein
Chr01_14483766_14485069_DEL	0.87 (33/39)	0 (0/35)	0 (0/31)	0 (0/25)	0.08 (3/37)	0 (0/48)	0 (0/46)	0.05 (2/36)	4.50527e-36	0	1	upstream_gene_variant	Sobic.001G172700	MODIFIER	PPR repeat containing protein
Chr01_15280531_15280589_DEL	0 (0/30)	0 (0/40)	0 (0/33)	0 (0/24)	0 (0/37)	0.07 (1/43)	0.93 (14/40)	0 (0/34)	5.05265e-14	0	7	downstream_gene_variant	Sobic.001G180000	MODIFIER	Dicer
Chr01_15306661_15306787_DEL	0 (0/35)	0 (0/38)	0 (0/31)	0 (0/27)	0.07 (1/32)	0.07 (1/42)	0.87 (13/46)	0 (0/37)	7.19047e-10	0	7	downstream_gene_variant	Sobic.001G180400	MODIFIER	OsMADS89 - MADS-box family gene with M-gamma type-box
Chr01_15482764_15482895_DEL	0 (0/39)	0.1 (3/41)	0.03 (1/28)	0 (0/25)	0 (0/33)	0.03 (1/45)	0.84 (26/36)	0 (0/36)	1.22079e-27	0	7	downstream_gene_variant	Sobic.001G182600	MODIFIER	GDSL-like lipase/acylhydrolase
Chr01_15641401_15641452_DEL	0 (0/38)	0 (0/40)	0.06 (1/32)	0 (0/25)	0 (0/35)	0.06 (1/44)	0.88 (15/42)	0 (0/35)	1.0703e-13	0	7	upstream_gene_variant	Sobic.001G183550	MODIFIER
Chr01_17478947_17479096_DEL	0 (0/33)	0 (0/41)	0 (0/33)	0.84 (16/22)	0.16 (3/30)	0 (0/44)	0 (0/49)	0 (0/30)	7.81975e-31	0	4	downstream_gene_variant	Sobic.001G195000	MODIFIER	protein kinase domain containing protein
Chr01_1767600_1767733_DEL	0.92 (12/33)	0 (0/37)	0 (0/30)	0 (0/23)	0.08 (1/34)	0 (0/45)	0 (0/47)	0 (0/33)	4.68394e-15	0	1	downstream_gene_variant	Sobic.001G021500	MODIFIER	CESA3 - cellulose synthase
Chr01_1787809_1788460_DEL	0.75 (12/28)	0 (0/37)	0 (0/31)	0 (0/29)	0.19 (3/34)	0 (0/55)	0 (0/44)	0.06 (1/33)	3.52228e-15	0	1	5_prime_UTR_variant	Sobic.001G021800	MODIFIER	mRNA-decapping enzyme
Chr01_17980293_17986199_DEL	0 (0/35)	0 (0/32)	0 (0/27)	1 (23/29)	0 (0/33)	0 (0/51)	0 (0/38)	0 (0/34)	2.66039e-39	0	4	intron_variant	Sobic.001G199100	MODIFIER	peptidase, M24 family protein
Chr01_18232828_18235013_DEL	0.05 (1/41)	0 (0/41)	0.05 (1/36)	0 (0/30)	0.14 (3/39)	0 (0/57)	0 (0/53)	0.76 (16/31)	2.91296e-21	0	8	exon_loss_variant	Sobic.001G201200	HIGH
Chr01_1895042_1895186_DEL	0.83 (15/37)	0 (0/41)	0 (0/33)	0 (0/24)	0.17 (3/36)	0 (0/44)	0 (0/49)	0 (0/35)	4.71893e-16	0	1	upstream_gene_variant	Sobic.001G023800	MODIFIER	expressed protein
Chr01_19187311_19194798_DEL	0.73 (19/35)	0 (0/32)	0.04 (1/33)	0.12 (3/28)	0.12 (3/30)	0 (0/54)	0 (0/41)	0 (0/33)	1.38395e-17	0	1	transcript_ablation	Sobic.001G209701	HIGH	zinc knuckle family protein
Chr01_19419944_19420025_DEL	0.04 (1/37)	0 (0/40)	0 (0/33)	0 (0/22)	0.13 (3/32)	0 (0/47)	0.04 (1/49)	0.78 (18/24)	1.20233e-28	0	8	upstream_gene_variant	Sobic.001G211101	MODIFIER	RIPER3 - Ripening-related family protein precursor
Chr01_1950205_1950877_DEL	0 (0/32)	0 (0/32)	0.28 (8/32)	0 (0/29)	0 (0/30)	0 (0/54)	0.72 (21/39)	0 (0/30)	2.12853e-18	0	7	splice_region_variant	Sobic.001G024800	LOW	uncharacterized Cys-rich domain containing protein
Chr01_19618374_19624589_DEL	0.89 (17/37)	0 (0/34)	0 (0/31)	0 (0/30)	0.11 (2/33)	0 (0/56)	0 (0/44)	0 (0/31)	1.22351e-19	0	1	downstream_gene_variant	Sobic.001G212500	MODIFIER	vacuolar protein sorting-associated protein 52
Chr01_20271881_20272337_DEL	0 (0/34)	0.15 (5/36)	0.03 (1/30)	0.03 (1/30)	0 (0/36)	0.7 (23/52)	0.03 (1/47)	0.06 (2/33)	5.88315e-12	0	6	intergenic_region	Sobic.001G217850-Sobic.001G217900	MODIFIER	cell division control protein 48 homolog E& expressed protein& carotenoid cleavage dioxygenase
Chr01_21448055_21448152_DEL	0.95 (20/28)	0 (0/41)	0 (0/33)	0 (0/26)	0.05 (1/37)	0 (0/51)	0 (0/51)	0 (0/37)	9.57081e-37	0	1	upstream_gene_variant	Sobic.001G223700	MODIFIER
Chr01_22332233_22332926_DEL	0.8 (36/39)	0 (0/35)	0 (0/26)	0 (0/24)	0.02 (1/37)	0 (0/47)	0 (0/44)	0.18 (8/35)	3.53759e-35	0	1	upstream_gene_variant	Sobic.001G231100	MODIFIER	DEFL11 - Defensin and Defensin-like DEFL family
Chr01_22373146_22394931_DEL	0.07 (1/37)	0.79 (11/35)	0 (0/32)	0 (0/29)	0 (0/36)	0.14 (2/55)	0 (0/46)	0 (0/35)	3.02319e-11	0	2	upstream_gene_variant	Sobic.001G231800	MODIFIER	glycine-rich cell wall structural protein 2 precursor
Chr01_22459316_22459805_DEL	0.76 (31/36)	0 (0/34)	0 (0/33)	0 (0/30)	0.05 (2/31)	0 (0/55)	0 (0/46)	0.2 (8/35)	4.83646e-33	0	1	upstream_gene_variant	Sobic.001G232000	MODIFIER	glycine-rich cell wall structural protein 2 precursor
Chr01_23768343_23769299_DEL	0 (0/32)	0 (0/29)	0 (0/30)	0 (0/29)	0.93 (13/36)	0 (0/54)	0 (0/42)	0.07 (1/32)	5.73713e-15	0	5	downstream_gene_variant	Sobic.001G235600	MODIFIER
Chr01_23841341_23852397_DEL	0 (0/36)	0 (0/33)	0.2 (3/31)	0.8 (12/24)	0 (0/33)	0 (0/55)	0 (0/42)	0 (0/33)	8.42703e-20	0	4	upstream_gene_variant	Sobic.001G236050	MODIFIER	expressed protein
Chr01_23998895_23999020_DEL	0.85 (23/28)	0 (0/41)	0 (0/33)	0 (0/25)	0.15 (4/33)	0 (0/50)	0 (0/53)	0 (0/36)	4.85061e-37	0	1	upstream_gene_variant	Sobic.001G237250	MODIFIER
Chr01_24522165_24522976_DEL	0 (0/34)	0 (0/29)	0.17 (3/29)	0.83 (15/26)	0 (0/31)	0 (0/54)	0 (0/45)	0 (0/35)	1.87221e-23	0	4	frameshift_variant	Sobic.001G238500	HIGH	UDP-glucoronosyl and UDP-glucosyl transferase domain containing protein
Chr01_26942411_26942483_DEL	0.05 (1/40)	0 (0/41)	0 (0/36)	0 (0/29)	0.1 (2/36)	0.05 (1/45)	0 (0/52)	0.8 (16/31)	7.39144e-21	0	8	5_prime_UTR_variant	Sobic.001G250000	MODIFIER
Chr01_26942803_26944299_DEL	0.04 (1/32)	0.04 (1/33)	0 (0/29)	0 (0/28)	0.13 (3/31)	0.04 (1/54)	0 (0/42)	0.74 (17/30)	2.36389e-18	0	8	frameshift_variant&start_lost&3_prime_UTR_truncation&exon_loss_variant&splice_region_variant	Sobic.001G250000	HIGH
Chr01_27261362_27266876_DEL	0.88 (22/32)	0 (0/35)	0 (0/29)	0 (0/29)	0.12 (3/29)	0 (0/53)	0 (0/39)	0 (0/33)	1.52784e-28	0	1	exon_loss_variant	Sobic.001G252050	HIGH
Chr01_27378407_27378973_DEL	0.05 (1/35)	0 (0/30)	0.05 (1/31)	0.05 (1/30)	0.14 (3/31)	0 (0/54)	0 (0/45)	0.73 (16/35)	1.48933e-14	0	8	intron_variant	Sobic.001G252500	MODIFIER	expressed protein
Chr01_27380855_27381367_DEL	0.05 (1/32)	0 (0/32)	0 (0/27)	0 (0/28)	0.16 (3/30)	0 (0/55)	0 (0/46)	0.79 (15/33)	4.05235e-16	0	8	upstream_gene_variant	Sobic.001G252600	MODIFIER	AAA-type ATPase family protein
Chr01_27385345_27388484_DEL	0.05 (1/36)	0 (0/30)	0.05 (1/29)	0 (0/29)	0.16 (3/33)	0 (0/56)	0 (0/38)	0.74 (14/32)	5.07441e-14	0	8	transcript_ablation	Sobic.001G252600	HIGH	AAA-type ATPase family protein
Chr01_28754874_28765638_DEL	0.93 (14/31)	0 (0/43)	0 (0/31)	0 (0/28)	0.07 (1/33)	0 (0/43)	0 (0/44)	0 (0/38)	2.12186e-20	0	1	intergenic_region	Sobic.001G254700-Sobic.001G254800	MODIFIER	expressed protein& RNA recognition motif containing protein& RNA recognition motif containing protein
Chr01_29111042_29111110_DEL	0.88 (14/32)	0 (0/41)	0 (0/31)	0 (0/23)	0.12 (2/29)	0 (0/44)	0 (0/46)	0 (0/32)	3.25972e-17	0	1	intergenic_region	Sobic.001G254800-Sobic.001G255001	MODIFIER	mla1& RNA recognition motif containing protein
Chr01_29818997_29819313_DEL	0.05 (1/34)	0 (0/32)	0 (0/31)	0 (0/22)	0.21 (4/34)	0 (0/47)	0 (0/44)	0.74 (14/34)	4.27292e-13	0	8	3_prime_UTR_variant	Sobic.001G256400	MODIFIER	pentatricopeptide
Chr01_3123548_3123614_DEL	1 (16/31)	0 (0/39)	0 (0/32)	0 (0/21)	0 (0/34)	0 (0/40)	0 (0/50)	0 (0/33)	1.28315e-24	0	1	upstream_gene_variant	Sobic.001G041800	MODIFIER	magnesium-chelatase subunit chlD, chloroplast precursor
Chr01_38348290_38351105_DEL	0 (0/30)	0.03 (1/31)	0.07 (3/30)	0 (0/29)	0 (0/33)	0.75 (30/50)	0.1 (4/44)	0.05 (2/32)	6.76663e-17	0	6	intergenic_region	Sobic.001G261549-Sobic.001G261557	MODIFIER	expressed protein& receptor-like protein kinase precursor& LTPL169 - Protease inhibitor/seed storage/LTP family protein precursor& LTPL169 - Protease inhibitor/seed storage/LTP family protein precursor& O-methyltransferase
Chr01_4336919_4338295_DEL	0.76 (28/34)	0 (0/34)	0 (0/31)	0 (0/31)	0.14 (5/37)	0.11 (4/56)	0 (0/44)	0 (0/32)	1.30127e-30	0	1	upstream_gene_variant	Sobic.001G057500	MODIFIER	basic proline-rich protein precursor
Chr01_4381505_4381841_DEL	0.96 (25/36)	0 (0/36)	0 (0/31)	0 (0/27)	0.04 (1/35)	0 (0/49)	0 (0/48)	0 (0/33)	1.33157e-33	0	1	upstream_gene_variant	Sobic.001G058000	MODIFIER
Chr01_4381569_4381826_DEL	0.93 (13/27)	0 (0/38)	0 (0/32)	0 (0/28)	0.07 (1/36)	0 (0/49)	0 (0/44)	0 (0/34)	7.1668e-22	0	1
Chr01_4385398_4387968_DEL	0.88 (30/38)	0 (0/31)	0 (0/29)	0 (0/30)	0.12 (4/33)	0 (0/53)	0 (0/42)	0 (0/30)	3.51876e-33	0	1	splice_region_variant	Sobic.001G058200	LOW	PPR repeat domain containing protein
Chr01_4531228_4531962_DEL	0.85 (23/31)	0 (0/31)	0 (0/31)	0 (0/29)	0.15 (4/33)	0 (0/56)	0 (0/41)	0 (0/34)	5.48384e-31	0	1	bidirectional_gene_fusion	Sobic.001G060666&Sobic.001G060732	HIGH
Chr01_4538176_4538315_DEL	0.85 (17/26)	0 (0/40)	0 (0/33)	0 (0/24)	0.15 (3/35)	0 (0/48)	0 (0/52)	0 (0/37)	1.20782e-28	0	1	splice_region_variant	Sobic.001G061000	LOW	plastocyanin-like domain containing protein
Chr01_46010099_46010163_DEL	0 (0/35)	0 (0/42)	0.15 (3/32)	0 (0/23)	0 (0/33)	0.7 (14/39)	0.1 (2/42)	0.05 (1/34)	9.26618e-10	0	6	intergenic_region	Sobic.001G261700-Sobic.001G261750	MODIFIER	receptor protein kinase& zinc knuckle domain containing protein
Chr01_49630610_49653404_DEL	0.1 (2/39)	0 (0/39)	0 (0/31)	0 (0/28)	0.05 (1/30)	0.15 (3/45)	0.7 (14/39)	0 (0/36)	6.1495e-10	0	7	intergenic_region	Sobic.001G264700-Sobic.001G264800	MODIFIER	protein phosphatase inhibitor 2 containing protein& cytokinin-N-glucosyltransferase 1& mitochondrial import inner membrane translocase subunit Tim
Chr01_51281381_51281496_DEL	0.82 (14/34)	0 (0/44)	0 (0/33)	0 (0/27)	0.18 (3/39)	0 (0/51)	0 (0/51)	0 (0/36)	1.78227e-17	0	1	intergenic_region	Sobic.001G268100-Sobic.001G268200	MODIFIER	no apical meristem protein& OsFBX209 - F-box domain containing protein& autophagy-related protein 3
Chr01_53020469_53021441_DEL	0.05 (1/33)	0 (0/32)	0 (0/27)	0 (0/29)	0.16 (3/31)	0 (0/54)	0 (0/44)	0.79 (15/36)	1.4402e-14	0	8	downstream_gene_variant	Sobic.001G273700	MODIFIER	tRNA-splicing endonuclease positive effector-related
Chr01_53573112_53574132_DEL	0.05 (1/34)	0 (0/30)	0 (0/32)	0 (0/29)	0.05 (1/34)	0 (0/54)	0 (0/42)	0.89 (17/35)	2.46969e-20	0	8	upstream_gene_variant	Sobic.001G275800	MODIFIER	peptide transporter PTR2
Chr01_53573278_53573835_DEL	0.05 (1/40)	0 (0/41)	0 (0/35)	0 (0/27)	0.2 (4/35)	0.05 (1/54)	0 (0/54)	0.7 (14/31)	2.96803e-16	0	8	upstream_gene_variant	Sobic.001G275800	MODIFIER	peptide transporter PTR2
Chr01_53582443_53582515_DEL	0.07 (1/31)	0 (0/42)	0 (0/31)	0 (0/25)	0.07 (1/34)	0 (0/46)	0 (0/51)	0.86 (12/28)	2.90099e-17	0	8	downstream_gene_variant	Sobic.001G275800	MODIFIER	peptide transporter PTR2
Chr01_53806919_53807026_DEL	0.06 (1/38)	0 (0/44)	0 (0/36)	0 (0/24)	0.06 (1/37)	0 (0/48)	0 (0/50)	0.88 (14/32)	2.22292e-19	0	8	downstream_gene_variant	Sobic.001G276200	MODIFIER	ACI13
Chr01_54755981_54763606_DEL	0.92 (22/31)	0 (0/39)	0 (0/31)	0 (0/31)	0.08 (2/33)	0 (0/54)	0 (0/49)	0 (0/29)	1.77875e-33	0	1	downstream_gene_variant	Sobic.001G280000	MODIFIER	OsSCP46 - Putative Serine Carboxypeptidase homologue
Chr01_54829933_54838131_DEL	0.87 (27/37)	0 (0/33)	0 (0/30)	0 (0/29)	0.13 (4/33)	0 (0/55)	0 (0/44)	0 (0/30)	6.62675e-31	0	1	intergenic_region	Sobic.001G280000-Sobic.001G280100	MODIFIER	expressed protein
Chr01_54863869_54876005_DEL	0.94 (30/39)	0 (0/31)	0 (0/30)	0 (0/29)	0.06 (2/30)	0 (0/52)	0 (0/43)	0 (0/26)	1.47901e-33	0	1	upstream_gene_variant	Sobic.001G280100	MODIFIER	ELMO/CED-12 family protein
Chr01_54889584_54898087_DEL	0.92 (22/29)	0 (0/32)	0 (0/31)	0 (0/31)	0.08 (2/34)	0 (0/51)	0 (0/45)	0 (0/33)	1.18444e-34	0	1	downstream_gene_variant	Sobic.001G280100	MODIFIER	ELMO/CED-12 family protein
Chr01_57453581_57453800_DEL	0.95 (19/37)	0 (0/40)	0 (0/32)	0 (0/25)	0.05 (1/34)	0 (0/47)	0 (0/50)	0 (0/34)	3.71746e-24	0	1	intergenic_region	Sobic.001G295700-Sobic.001G295800	MODIFIER	DNA binding protein& expressed protein
Chr01_57533597_57533706_DEL	0.95 (21/34)	0 (0/37)	0 (0/32)	0 (0/29)	0.05 (1/40)	0 (0/49)	0 (0/51)	0 (0/37)	2.48246e-31	0	1	upstream_gene_variant	Sobic.001G296300	MODIFIER	AP2 domain containing protein
Chr01_5756770_5757193_DEL	0.82 (23/29)	0 (0/36)	0 (0/29)	0.07 (2/30)	0.07 (2/34)	0 (0/56)	0 (0/43)	0.04 (1/34)	3.63094e-32	0	1	downstream_gene_variant	Sobic.001G075400	MODIFIER	expressed protein
Chr01_57579074_57579416_DEL	0.04 (1/34)	0 (0/35)	0 (0/34)	0 (0/27)	0.22 (6/38)	0 (0/46)	0 (0/42)	0.74 (20/37)	6.9741e-19	0	8	intron_variant	Sobic.001G296400	MODIFIER	palmitoyl-protein thioesterase 1 precursor
Chr01_57686196_57686938_DEL	0.04 (1/33)	0 (0/30)	0 (0/29)	0 (0/29)	0.22 (6/35)	0 (0/52)	0 (0/39)	0.74 (20/36)	8.26774e-19	0	8
Chr01_57855803_57856794_DEL	0.93 (27/40)	0 (0/29)	0 (0/31)	0 (0/29)	0.07 (2/33)	0 (0/53)	0 (0/42)	0 (0/31)	8.64799e-30	0	1	exon_loss_variant	Sobic.001G297966	HIGH
Chr01_57881558_57881746_DEL	0.88 (15/34)	0 (0/36)	0 (0/31)	0 (0/26)	0.12 (2/34)	0 (0/43)	0 (0/37)	0 (0/37)	2.79666e-17	0	1	downstream_gene_variant	Sobic.001G298200	MODIFIER
Chr01_57936210_57936289_DEL	0.86 (24/30)	0 (0/42)	0 (0/31)	0.04 (1/25)	0.07 (2/34)	0.04 (1/44)	0 (0/49)	0 (0/33)	1.30914e-33	0	1	downstream_gene_variant	Sobic.001G298500	MODIFIER	expressed protein
Chr01_58390085_58394092_DEL	0 (0/34)	0.04 (2/33)	0.02 (1/30)	0.02 (1/30)	0.09 (5/33)	0.76 (41/55)	0.06 (3/48)	0.02 (1/30)	1.84705e-22	0	6	upstream_gene_variant	Sobic.001G301900	MODIFIER	ZOS10-07 - C2H2 zinc finger protein
Chr01_58800640_58800930_DEL	0 (0/34)	0 (0/36)	0.05 (1/29)	0.9 (18/26)	0 (0/34)	0.05 (1/46)	0 (0/42)	0 (0/31)	5.87189e-30	0	4	downstream_gene_variant	Sobic.001G304100	MODIFIER	LTPL145 - Protease inhibitor/seed storage/LTP family protein precursor
Chr01_59124208_59125014_DEL	0.03 (1/34)	0 (0/30)	0 (0/28)	0 (0/30)	0.24 (8/34)	0.03 (1/53)	0 (0/39)	0.71 (24/34)	2.28157e-23	0	8	upstream_gene_variant	Sobic.001G306500	MODIFIER	expansin precursor
Chr01_59842905_59843855_DEL	0.86 (32/37)	0 (0/41)	0 (0/31)	0 (0/26)	0.11 (4/35)	0 (0/46)	0 (0/46)	0.03 (1/35)	2.38038e-37	0	1	frameshift_variant&start_lost&splice_region_variant	Sobic.001G311601	HIGH
Chr01_59844682_59854402_DEL	0.91 (29/35)	0 (0/39)	0 (0/29)	0 (0/30)	0.06 (2/36)	0 (0/52)	0 (0/44)	0.03 (1/34)	2.32267e-38	0	1	upstream_gene_variant	Sobic.001G311500	MODIFIER	N-acetylglucosaminyl transferase component
Chr01_59867908_59868715_DEL	0.86 (30/34)	0 (0/39)	0 (0/36)	0 (0/31)	0.11 (4/34)	0 (0/57)	0 (0/53)	0.03 (1/31)	2.60331e-41	0	1
Chr01_60202727_60203990_DEL	0.93 (28/35)	0 (0/31)	0 (0/32)	0 (0/30)	0.07 (2/32)	0 (0/52)	0 (0/41)	0 (0/33)	1.9436e-36	0	1	intergenic_region	Sobic.001G314400-Sobic.001G314500	MODIFIER	Core histone H2A/H2B/H3/H4 domain containing protein& pectinesterase& expressed protein& hypothetical protein
Chr01_6067273_6067358_DEL	0 (0/39)	0.15 (5/41)	0.03 (1/33)	0.06 (2/26)	0 (0/36)	0.71 (24/40)	0 (0/50)	0.06 (2/35)	6.47808e-19	0	6	upstream_gene_variant	Sobic.001G078900	MODIFIER	MYB family transcription factor
Chr01_6084963_6085447_DEL	0 (0/35)	0 (0/35)	0 (0/31)	0 (0/24)	0.09 (2/29)	0 (0/54)	0.91 (20/46)	0 (0/29)	5.71672e-17	0	7	upstream_gene_variant	Sobic.001G079100	MODIFIER	upstream activation factor subunit spp27
Chr01_61449059_61454740_DEL	0.83 (25/35)	0 (0/29)	0 (0/30)	0 (0/30)	0.13 (4/31)	0 (0/54)	0 (0/40)	0.03 (1/30)	2.87453e-27	0	1	intron_variant	Sobic.001G327800	MODIFIER	uncharacterized mscS family protein
Chr01_61558760_61558853_DEL	0.83 (15/29)	0 (0/41)	0.06 (1/34)	0 (0/24)	0.11 (2/36)	0 (0/44)	0 (0/48)	0 (0/32)	1.98436e-20	0	1	downstream_gene_variant	Sobic.001G328000	MODIFIER	phenazine biosynthesis protein
Chr01_62943929_62944707_DEL	0.88 (15/35)	0 (0/33)	0 (0/27)	0 (0/30)	0.12 (2/32)	0 (0/52)	0 (0/44)	0 (0/37)	1.27675e-17	0	1	upstream_gene_variant	Sobic.001G342000	MODIFIER	expressed protein
Chr01_63124362_63200701_DEL	0 (0/36)	0 (0/38)	0.23 (5/28)	0 (0/28)	0 (0/36)	0 (0/55)	0.77 (17/41)	0 (0/31)	2.34198e-15	0	7	feature_ablation	Sobic.001G343601&Sobic.001G343700&Sobic.001G343766&Sobic.001G343832	HIGH	sterol-4-alpha-carboxylate 3-dehydrogenase, decarboxylating& transposon protein, unclassified& ulp1 protease family, C-terminal catalytic domain containing protein& NAD dependent epimerase/dehydratase family protein
Chr01_63299142_63299242_DEL	0 (0/30)	0.04 (1/41)	0.12 (3/26)	0.04 (1/21)	0 (0/34)	0 (0/54)	0.8 (20/48)	0 (0/30)	1.88339e-13	0	7	intergenic_region	Sobic.001G344450-Sobic.001G344500	MODIFIER	copper methylamine oxidase precursor& pyridoxal-dependent decarboxylase protein& pyridoxal-dependent decarboxylase protein
Chr01_63747121_63747534_DEL	0 (0/41)	0 (0/38)	0.19 (3/29)	0 (0/28)	0.06 (1/36)	0 (0/50)	0.75 (12/47)	0 (0/34)	2.94108e-08	0	7	upstream_gene_variant	Sobic.001G348100	MODIFIER	acetyl-CoA acetyltransferase, cytosolic
Chr01_64062497_64062962_DEL	0.81 (21/31)	0 (0/32)	0 (0/29)	0 (0/29)	0.15 (4/34)	0.04 (1/55)	0 (0/46)	0 (0/33)	1.65016e-26	0	1	upstream_gene_variant	Sobic.001G351000	MODIFIER	phospho-2-dehydro-3-deoxyheptonate aldolase, chloroplast precursor
Chr01_64291840_64292332_DEL	0 (0/37)	0.06 (1/36)	0 (0/35)	0.94 (16/28)	0 (0/36)	0 (0/51)	0 (0/48)	0 (0/36)	7.94679e-29	0	4	upstream_gene_variant	Sobic.001G353300	MODIFIER	uncharacterized glycosyl hydrolase Rv2006/MT2062
Chr01_64327879_64328170_DEL	0.8 (24/38)	0 (0/40)	0.07 (2/28)	0 (0/26)	0.07 (2/32)	0 (0/46)	0 (0/44)	0.07 (2/31)	2.23061e-22	0	1	intergenic_region	Sobic.001G353300-Sobic.001G353400	MODIFIER	small G protein family protein& mTERF domain containing protein& expressed protein& expressed protein
Chr01_64355166_64355254_DEL	0.95 (18/30)	0 (0/40)	0 (0/34)	0 (0/26)	0.05 (1/35)	0 (0/47)	0 (0/51)	0 (0/39)	8.98747e-30	0	1	intron_variant	Sobic.001G353400	MODIFIER	WD-40 repeat family protein
Chr01_64453214_64453819_DEL	0 (0/33)	0 (0/30)	0.04 (1/30)	0 (0/29)	0 (0/30)	0 (0/52)	0.96 (25/50)	0 (0/32)	3.76318e-21	0	7	downstream_gene_variant	Sobic.001G354600	MODIFIER	SAP domain containing protein
Chr01_64515309_64515394_DEL	0.85 (17/38)	0 (0/42)	0 (0/34)	0 (0/26)	0.05 (1/38)	0 (0/54)	0 (0/53)	0.1 (2/31)	3.1047e-19	0	1	upstream_gene_variant	Sobic.001G355200	MODIFIER	tRNA pseudouridine synthase family protein
Chr01_65320955_65321511_DEL	0.85 (17/25)	0 (0/40)	0 (0/26)	0 (0/31)	0.05 (1/33)	0 (0/53)	0 (0/39)	0.1 (2/36)	3.44603e-28	0	1	downstream_gene_variant	Sobic.001G364100	MODIFIER	mTERF domain containing protein
Chr01_66004900_66005893_DEL	0.95 (20/33)	0 (0/34)	0 (0/30)	0 (0/25)	0.05 (1/28)	0 (0/54)	0 (0/44)	0 (0/33)	2.2694e-27	0	1	upstream_gene_variant	Sobic.001G371800	MODIFIER	expressed protein
Chr01_66004940_66005743_DEL	0.93 (14/27)	0 (0/33)	0 (0/29)	0 (0/30)	0.07 (1/37)	0 (0/55)	0 (0/40)	0 (0/30)	3.73753e-23	0	1	upstream_gene_variant	Sobic.001G371800	MODIFIER	expressed protein
Chr01_67853820_67853920_DEL	0.94 (17/34)	0 (0/44)	0 (0/36)	0 (0/29)	0 (0/35)	0 (0/56)	0 (0/52)	0.06 (1/37)	5.627e-26	0	1	downstream_gene_variant	Sobic.001G392200	MODIFIER	CAS1 domain-containing protein 1 precursor
Chr01_68224269_68224879_DEL	0.16 (7/39)	0 (0/38)	0 (0/25)	0 (0/30)	0 (0/37)	0.02 (1/51)	0.81 (35/50)	0 (0/31)	1.75355e-26	0	7	upstream_gene_variant	Sobic.001G396700	MODIFIER	glycosyltransferase
Chr01_68784204_68784352_DEL	0 (0/36)	0 (0/41)	0 (0/33)	0.07 (1/21)	0.8 (12/34)	0 (0/35)	0.13 (2/46)	0 (0/34)	7.26457e-12	0	5	upstream_gene_variant	Sobic.001G402300	MODIFIER	RNA recognition motif containing protein
Chr01_71904953_71905023_DEL	0.75 (18/36)	0 (0/42)	0 (0/32)	0 (0/24)	0.25 (6/37)	0 (0/51)	0 (0/51)	0 (0/36)	1.32709e-19	0	1	upstream_gene_variant	Sobic.001G441200	MODIFIER	translocase of chloroplast 34
Chr01_72066036_72066127_DEL	0 (0/41)	0 (0/43)	0.25 (4/36)	0 (0/25)	0 (0/38)	0 (0/48)	0.75 (12/49)	0 (0/38)	8.23543e-09	0	7	upstream_gene_variant	Sobic.001G443100	MODIFIER	oxidoreductase, aldo/keto reductase family protein
Chr01_72946189_72946260_DEL	0.93 (25/33)	0 (0/43)	0.04 (1/34)	0 (0/28)	0.04 (1/33)	0 (0/44)	0 (0/53)	0 (0/36)	6.73506e-37	0	1	downstream_gene_variant	Sobic.001G453100	MODIFIER	homocysteine S-methyltransferase protein
Chr01_73214019_73214421_DEL	0.9 (27/38)	0 (0/32)	0 (0/32)	0 (0/31)	0.1 (3/29)	0 (0/50)	0 (0/41)	0 (0/30)	6.15778e-30	0	1	upstream_gene_variant	Sobic.001G456000	MODIFIER	YABBY domain containing protein
Chr01_73235260_73236290_DEL	0 (0/36)	0 (0/32)	0 (0/30)	1 (20/28)	0 (0/34)	0 (0/54)	0 (0/39)	0 (0/30)	6.8709e-36	0	4	intergenic_region	Sobic.001G456000-Sobic.001G456100	MODIFIER	DNA methyltransferase protein& phenazine biosynthesis protein& phenazine biosynthesis protein& peroxiredoxin
Chr01_73762867_73763037_DEL	0 (0/36)	0.15 (3/40)	0.1 (2/31)	0 (0/26)	0 (0/37)	0 (0/48)	0.75 (15/42)	0 (0/38)	1.43814e-11	0	7	upstream_gene_variant	Sobic.001G463800	MODIFIER	expressed protein
Chr01_73928510_73929123_DEL	0 (0/32)	0 (0/32)	0 (0/32)	0.89 (17/25)	0.11 (2/31)	0 (0/51)	0 (0/43)	0 (0/34)	8.39013e-30	0	4	upstream_gene_variant	Sobic.001G465400	MODIFIER	dihydrolipoyllysine-residue succinyltransferase component of 2-oxoglutarate dehydrogenase complex, mitochondrial precursor
Chr01_74072080_74072908_DEL	0.79 (34/39)	0 (0/31)	0 (0/29)	0 (0/27)	0.19 (8/34)	0 (0/49)	0.02 (1/42)	0 (0/29)	9.90955e-32	0	1	upstream_gene_variant	Sobic.001G467700	MODIFIER	arginyl-tRNA synthetase
Chr01_75029944_75030032_DEL	0.91 (21/33)	0 (0/41)	0 (0/35)	0 (0/24)	0.09 (2/33)	0 (0/44)	0 (0/50)	0 (0/35)	4.1435e-29	0	1	upstream_gene_variant	Sobic.001G478000	MODIFIER	CutA, chloroplast precursor
Chr01_75088166_75088258_DEL	0.09 (2/39)	0 (0/39)	0 (0/27)	0 (0/24)	0 (0/36)	0.04 (1/55)	0.17 (4/51)	0.7 (16/29)	3.05531e-18	0	8	intergenic_region	Sobic.001G478500-Sobic.001G478600	MODIFIER	RNA-dependent RNA polymerase& multidrug resistance-associated protein& 1-aminocyclopropane-1-carboxylate oxidase homolog 1
Chr01_75239873_75239949_DEL	0.74 (23/29)	0 (0/42)	0.03 (1/34)	0 (0/25)	0.23 (7/33)	0 (0/44)	0 (0/48)	0 (0/33)	1.19051e-29	0	1	downstream_gene_variant	Sobic.001G480400	MODIFIER	expressed protein
Chr01_75251610_75251695_DEL	0.87 (26/36)	0 (0/42)	0 (0/33)	0 (0/26)	0.13 (4/34)	0 (0/50)	0 (0/52)	0 (0/37)	4.28246e-33	0	1	upstream_gene_variant	Sobic.001G480550	MODIFIER	amine oxidase, flavin-containing, domain containing protein
Chr01_75610316_75614448_DEL	0 (0/33)	0 (0/34)	0.06 (1/31)	0.94 (16/27)	0 (0/31)	0 (0/54)	0 (0/43)	0 (0/30)	2.6172e-27	0	4	upstream_gene_variant	Sobic.001G485300	MODIFIER	transcription initiation factor IIE subunit beta
Chr01_75699772_75700240_DEL	0.89 (16/34)	0 (0/36)	0 (0/30)	0 (0/31)	0.11 (2/33)	0 (0/51)	0 (0/43)	0 (0/29)	1.61885e-19	0	1	splice_acceptor_variant&splice_region_variant&3_prime_UTR_variant&intron_variant	Sobic.001G486500	HIGH	tRNA methyltransferase
Chr01_75711417_75712214_DEL	0.9 (18/34)	0 (0/32)	0 (0/30)	0 (0/27)	0.1 (2/33)	0 (0/51)	0 (0/43)	0 (0/33)	3.99033e-22	0	1	upstream_gene_variant	Sobic.001G486500	MODIFIER	tRNA methyltransferase
Chr01_7752255_7763785_DEL	0.86 (30/34)	0 (0/32)	0 (0/30)	0 (0/30)	0.14 (5/37)	0 (0/54)	0 (0/46)	0 (0/31)	3.43201e-38	0	1	downstream_gene_variant	Sobic.001G101500	MODIFIER	endoplasmic oxidoreductin-1 precursor
Chr01_77998061_77998161_DEL	0.93 (13/32)	0 (0/42)	0 (0/35)	0 (0/25)	0.07 (1/31)	0 (0/45)	0 (0/45)	0 (0/35)	6.99225e-18	0	1	upstream_gene_variant	Sobic.001G512100	MODIFIER	CorA-like magnesium transporter protein
Chr01_7842680_7842919_DEL	0.12 (3/34)	0 (0/37)	0 (0/35)	0 (0/23)	0.12 (3/36)	0 (0/46)	0 (0/49)	0.75 (18/33)	3.88382e-19	0	8	upstream_gene_variant	Sobic.001G102350	MODIFIER
Chr01_78789804_78789926_DEL	0.91 (20/30)	0 (0/40)	0 (0/31)	0 (0/25)	0.09 (2/32)	0 (0/38)	0 (0/50)	0 (0/33)	7.70001e-29	0	1	upstream_gene_variant	Sobic.001G522900	MODIFIER	expressed protein
Chr01_79331644_79331717_DEL	0.87 (20/32)	0 (0/41)	0 (0/34)	0 (0/24)	0.13 (3/33)	0 (0/42)	0 (0/49)	0 (0/37)	7.62921e-27	0	1	intron_variant	Sobic.001G529600	MODIFIER	1,3-beta-glucan synthase component domain containing protein
Chr01_79634645_79635112_DEL	0.08 (3/36)	0 (0/31)	0 (0/28)	0.08 (3/28)	0.05 (2/31)	0 (0/49)	0.03 (1/45)	0.76 (29/35)	2.39087e-28	0	8	upstream_gene_variant	Sobic.001G533000	MODIFIER	expressed protein
Chr01_79741066_79742367_DEL	0 (0/32)	0 (0/30)	0 (0/26)	0 (0/30)	0.19 (3/34)	0 (0/54)	0.81 (13/46)	0 (0/32)	2.44975e-09	0	7	upstream_gene_variant	Sobic.001G534200	MODIFIER
Chr01_79962966_79963077_DEL	0.05 (1/36)	0 (0/41)	0 (0/34)	0 (0/24)	0.1 (2/35)	0 (0/43)	0.05 (1/51)	0.8 (16/27)	6.60969e-23	0	8	downstream_gene_variant	Sobic.001G536200	MODIFIER	expressed protein
Chr01_8021410_8021576_DEL	0 (0/35)	0 (0/40)	0.06 (1/31)	0 (0/26)	0.22 (4/35)	0 (0/45)	0.72 (13/42)	0 (0/38)	1.35202e-09	0	7	upstream_gene_variant	Sobic.001G104600	MODIFIER	expressed protein
Chr01_8311941_8312002_DEL	0.77 (27/33)	0 (0/42)	0 (0/31)	0 (0/25)	0.17 (6/32)	0 (0/45)	0 (0/45)	0.06 (2/32)	3.50703e-30	0	1	intergenic_region	Sobic.001G107300-Sobic.001G107400	MODIFIER	expressed protein& pentatricopeptide& GDSL-like lipase/acylhydrolase& GRF zinc finger family protein& cystathionine gamma-synthase
Chr01_8312456_8313658_DEL	0.73 (35/38)	0 (0/30)	0.02 (1/28)	0 (0/29)	0.15 (7/34)	0 (0/52)	0 (0/40)	0.1 (5/30)	5.20922e-30	0	1	intergenic_region	Sobic.001G107300-Sobic.001G107400	MODIFIER	expressed protein& pentatricopeptide& GDSL-like lipase/acylhydrolase& GRF zinc finger family protein& cystathionine gamma-synthase
Chr01_8314630_8314691_DEL	0.72 (18/24)	0 (0/40)	0 (0/34)	0 (0/25)	0.2 (5/37)	0 (0/51)	0 (0/47)	0.08 (2/34)	1.98757e-27	0	1	intergenic_region	Sobic.001G107300-Sobic.001G107400	MODIFIER	expressed protein& pentatricopeptide& GDSL-like lipase/acylhydrolase& GRF zinc finger family protein& cystathionine gamma-synthase
Chr01_9634186_9634325_DEL	0.78 (14/24)	0 (0/40)	0.06 (1/34)	0 (0/23)	0.17 (3/29)	0 (0/47)	0 (0/48)	0 (0/34)	1.45784e-21	0	1	upstream_gene_variant	Sobic.001G122300	MODIFIER	PAP fibrillin family domain containing protein
Chr01_9636119_9636295_DEL	0.83 (20/32)	0 (0/39)	0 (0/30)	0 (0/25)	0.12 (3/35)	0 (0/50)	0 (0/44)	0.04 (1/36)	3.8529e-25	0	1	upstream_gene_variant	Sobic.001G122400	MODIFIER	ribosomal protein S13p/S18e
Chr02_10222672_10223032_DEL	1 (18/41)	0 (0/32)	0 (0/29)	0 (0/26)	0 (0/32)	0 (0/48)	0 (0/41)	0 (0/36)	3.62801e-20	0	1	splice_donor_variant&disruptive_inframe_deletion&splice_region_variant&intron_variant	Sobic.002G096900	HIGH	autophagy-related protein 3
Chr02_1073139_1073269_DEL	0 (0/37)	0 (0/40)	0.17 (5/29)	0.03 (1/20)	0 (0/33)	0.07 (2/43)	0.73 (22/41)	0 (0/37)	1.52354e-16	0	7	upstream_gene_variant	Sobic.002G011400	MODIFIER	HLS
Chr02_12827108_12827187_DEL	0.71 (15/28)	0 (0/40)	0 (0/31)	0.05 (1/28)	0.24 (5/32)	0 (0/39)	0 (0/52)	0 (0/33)	2.41977e-18	0	1	intergenic_region	Sobic.002G107000-Sobic.002G107200	MODIFIER	Sec1 family transport protein& protein phosphatase 2C
Chr02_13459846_13476021_DEL	0.83 (25/34)	0 (0/33)	0 (0/33)	0 (0/30)	0.13 (4/34)	0.03 (1/52)	0 (0/44)	0 (0/31)	9.23982e-30	0	1	upstream_gene_variant	Sobic.002G110600	MODIFIER	regulatory protein
Chr02_15369998_15372155_DEL	0 (0/40)	0 (0/43)	0.06 (3/36)	0 (0/30)	0.02 (1/37)	0.85 (44/55)	0.02 (1/43)	0.06 (3/37)	4.84021e-33	0	6	intergenic_region	Sobic.002G120300-Sobic.002G120400	MODIFIER	zinc knuckle domain containing protein& expressed protein& N-carbamoylputrescine amidase& expressed protein
Chr02_1974485_1976521_DEL	0.06 (1/35)	0 (0/32)	0 (0/30)	0 (0/29)	0.12 (2/33)	0 (0/46)	0 (0/47)	0.82 (14/26)	1.68776e-20	0	8
Chr02_24046097_24049078_DEL	0 (0/34)	0.8 (12/32)	0.13 (2/31)	0.07 (1/31)	0 (0/30)	0 (0/54)	0 (0/42)	0 (0/32)	2.42582e-13	0	2	intergenic_region	Sobic.002G143300-Sobic.002G143450	MODIFIER	membrane-associated salt-inducible protein like& nucleolar matrix protein-related
Chr02_24873839_24891363_DEL	0.86 (18/34)	0 (0/35)	0 (0/30)	0 (0/30)	0.1 (2/35)	0 (0/53)	0 (0/39)	0.05 (1/33)	3.31379e-21	0	1	intergenic_region	Sobic.002G143450-Sobic.002G143500	MODIFIER	nucleolar matrix protein-related& transposon protein, unclassified& RPA2B - Putative single-stranded DNA binding complex subunit 2
Chr02_25338364_25342533_DEL	0 (0/34)	0.75 (12/34)	0.19 (3/32)	0.06 (1/30)	0 (0/34)	0 (0/55)	0 (0/41)	0 (0/34)	4.49874e-12	0	2	intron_variant	Sobic.002G143500	MODIFIER	sulfate transporter 4.1, chloroplast precursor
Chr02_26395691_26400253_DEL	0.85 (17/34)	0 (0/31)	0 (0/28)	0 (0/30)	0.1 (2/32)	0 (0/53)	0 (0/41)	0.05 (1/33)	4.08785e-19	0	1	intergenic_region	Sobic.002G144600-Sobic.002G144732	MODIFIER	expressed protein& dehydrogenase& expressed protein& expressed protein& expressed protein
Chr02_26873239_26873807_DEL	0.83 (15/34)	0 (0/34)	0 (0/32)	0 (0/28)	0.11 (2/34)	0 (0/53)	0 (0/42)	0.06 (1/31)	1.08337e-16	0	1	intergenic_region	Sobic.002G144600-Sobic.002G144732	MODIFIER	expressed protein& dehydrogenase& expressed protein& expressed protein& expressed protein
Chr02_31871041_31871499_DEL	0.88 (15/33)	0 (0/38)	0 (0/29)	0 (0/29)	0.06 (1/37)	0 (0/51)	0 (0/48)	0.06 (1/32)	2.42589e-19	0	1	intergenic_region	Sobic.002G147300-Sobic.002G147350	MODIFIER	trpH
Chr02_32019168_32026118_DEL	0 (0/34)	0.76 (13/39)	0.18 (3/34)	0.06 (1/30)	0 (0/37)	0 (0/57)	0 (0/48)	0 (0/33)	3.74448e-12	0	2	intergenic_region	Sobic.002G147350-Sobic.002G147400	MODIFIER	trpH& expressed protein& glycosyl hydrolase family 3 protein
Chr02_36829885_36830337_DEL	0.85 (17/37)	0 (0/34)	0 (0/29)	0 (0/30)	0.1 (2/28)	0 (0/56)	0 (0/39)	0.05 (1/32)	2.06196e-17	0	1	intergenic_region	Sobic.002G147500-Sobic.002G147600	MODIFIER	DUF581 domain containing protein& heavy metal-associated domain containing protein& eukaryotic aspartyl protease domain containing protein& expressed protein& expressed protein& transposon protein, unclassified
Chr02_42410272_42419810_DEL	0.89 (16/31)	0 (0/37)	0 (0/31)	0 (0/30)	0.11 (2/34)	0 (0/55)	0 (0/46)	0 (0/34)	5.57042e-23	0	1	intergenic_region	Sobic.002G150301-Sobic.002G150400	MODIFIER	kinesin motor domain containing protein& DCN1-like protein 2& expressed protein
Chr02_42452474_42461865_DEL	0.93 (13/31)	0 (0/36)	0 (0/30)	0 (0/28)	0.07 (1/32)	0 (0/52)	0 (0/44)	0 (0/30)	4.85953e-18	0	1	intergenic_region	Sobic.002G150301-Sobic.002G150400	MODIFIER	kinesin motor domain containing protein& DCN1-like protein 2& expressed protein
Chr02_44052914_44059153_DEL	0.81 (13/34)	0 (0/43)	0 (0/36)	0 (0/29)	0.12 (2/36)	0 (0/54)	0 (0/52)	0.06 (1/37)	6.48119e-16	0	1	downstream_gene_variant	Sobic.002G150800	MODIFIER	WD domain, G-beta repeat domain containing protein
Chr02_47596351_47596935_DEL	0 (0/32)	0.11 (3/34)	0.04 (1/33)	0 (0/30)	0.04 (1/31)	0.78 (21/49)	0 (0/42)	0.04 (1/30)	1.21534e-12	0	6	intergenic_region	Sobic.002G156601-Sobic.002G156700	MODIFIER	WD domain, G-beta repeat domain containing protein& cytochrome P450& KH domain containing protein& ZAC& amino acid transporter& PPR repeat domain containing protein
Chr02_5080100_5084503_DEL	0.71 (24/39)	0 (0/35)	0.03 (1/32)	0 (0/22)	0.18 (6/36)	0.03 (1/54)	0 (0/52)	0.06 (2/34)	1.88638e-20	0	1	downstream_gene_variant	Sobic.002G053500	MODIFIER	expressed protein
Chr02_5094824_5094940_DEL	0.77 (20/33)	0.04 (1/42)	0 (0/32)	0 (0/28)	0.12 (3/34)	0 (0/52)	0 (0/51)	0.08 (2/36)	2.5129e-23	0	1	upstream_gene_variant	Sobic.002G053600	MODIFIER	choline/ethanolamine kinase
Chr02_5295892_5296030_DEL	0 (0/33)	0 (0/41)	0.07 (1/31)	0.93 (13/24)	0 (0/33)	0 (0/44)	0 (0/49)	0 (0/36)	1.45757e-25	0	4	upstream_gene_variant	Sobic.002G055500	MODIFIER	expressed protein
Chr02_5319397_5319529_DEL	0.06 (1/36)	0.06 (1/41)	0 (0/33)	0 (0/21)	0.18 (3/34)	0 (0/49)	0 (0/47)	0.71 (12/32)	9.37652e-12	0	8	downstream_gene_variant	Sobic.002G055900	MODIFIER	OsIAA24 - Auxin-responsive Aux/IAA gene family member
Chr02_54441331_54441404_DEL	0.21 (3/37)	0 (0/40)	0 (0/35)	0 (0/28)	0 (0/33)	0 (0/48)	0 (0/47)	0.79 (11/28)	4.23368e-15	0	8	intergenic_region	Sobic.002G171700-Sobic.002G171800	MODIFIER	expansin precursor& expansin precursor& expressed protein
Chr02_54955783_54969570_DEL	0 (0/39)	0.06 (2/41)	0.11 (4/32)	0.71 (25/29)	0.11 (4/35)	0 (0/57)	0 (0/52)	0 (0/37)	5.90852e-34	0	4	upstream_gene_variant	Sobic.002G173800	MODIFIER	hydroxyproline-rich glycoprotein family protein
Chr02_55386797_55387391_DEL	0 (0/35)	0.02 (1/32)	0.06 (3/30)	0 (0/30)	0.14 (7/35)	0.06 (3/48)	0.73 (37/46)	0 (0/34)	9.51017e-25	0	7	upstream_gene_variant	Sobic.002G175200	MODIFIER	A3-BTB2 - Bric-a-Brac, Tramtrack, Broad Complex BTB domain with A3 subfamily conserved sequence
Chr02_55495103_55495505_DEL	0.82 (14/34)	0 (0/34)	0 (0/29)	0 (0/31)	0.18 (3/35)	0 (0/55)	0 (0/39)	0 (0/35)	6.66637e-16	0	1	intergenic_region	Sobic.002G176000-Sobic.002G176100	MODIFIER	coronatine-insensitive protein 1
Chr02_57506269_57506638_DEL	0.84 (27/37)	0 (0/31)	0 (0/30)	0 (0/28)	0.16 (5/34)	0 (0/48)	0 (0/40)	0 (0/34)	1.01245e-28	0	1	upstream_gene_variant	Sobic.002G189000	MODIFIER	homeobox associated leucine zipper
Chr02_57507815_57509075_DEL	0.84 (31/39)	0 (0/32)	0 (0/29)	0 (0/29)	0.14 (5/39)	0 (0/56)	0 (0/43)	0.03 (1/32)	8.20963e-33	0	1	intergenic_region	Sobic.002G189000-Sobic.002G189100	MODIFIER	calcium-dependent protein kinase isoform AK1& glycogen synthase 1
Chr02_57566146_57566237_DEL	0 (0/40)	0.04 (1/42)	0.12 (3/33)	0 (0/23)	0 (0/32)	0.71 (17/40)	0 (0/48)	0.12 (3/36)	8.44477e-13	0	6	downstream_gene_variant	Sobic.002G189600	MODIFIER	expressed protein
Chr02_57577035_57578583_DEL	0 (0/34)	0 (0/30)	0.11 (2/29)	0.72 (13/29)	0.11 (2/33)	0 (0/55)	0 (0/42)	0.06 (1/34)	2.02544e-14	0	4	intergenic_region	Sobic.002G189600-Sobic.002G189700	MODIFIER	CK1_CaseinKinase_1.6 - CK1 includes the casein kinase 1 kinases& ABC transporter, ATP-binding protein& expressed protein
Chr02_58506452_58507412_DEL	0.76 (25/35)	0 (0/29)	0.06 (2/30)	0 (0/30)	0.18 (6/36)	0 (0/56)	0 (0/47)	0 (0/34)	1.38984e-26	0	1	downstream_gene_variant	Sobic.002G196100	MODIFIER	MYB family transcription factor
Chr02_59887393_59887519_DEL	0.76 (19/33)	0 (0/40)	0 (0/35)	0 (0/26)	0.08 (2/34)	0 (0/48)	0.04 (1/52)	0.12 (3/36)	2.49349e-21	0	1	intergenic_region	Sobic.002G207200-Sobic.002G207300	MODIFIER	protein of unknown function, DUF618 domain containing protein& expressed protein& EMB1379
Chr02_6028860_6029222_DEL	1 (22/35)	0 (0/39)	0 (0/32)	0 (0/25)	0 (0/34)	0 (0/51)	0 (0/49)	0 (0/33)	2.43925e-32	0	1	downstream_gene_variant	Sobic.002G062300	MODIFIER	expressed protein
Chr02_60831234_60840704_DEL	0 (0/34)	0 (0/32)	0.08 (1/28)	0 (0/28)	0 (0/36)	0.15 (2/51)	0.77 (10/38)	0 (0/32)	9.03069e-08	0	7	frameshift_variant&start_lost	Sobic.002G216200	HIGH	cytochrome P450
Chr02_61653273_61653559_DEL	0.04 (1/33)	0 (0/37)	0.04 (1/28)	0 (0/27)	0.15 (4/34)	0.04 (1/45)	0.74 (20/47)	0 (0/31)	4.25198e-12	0	7	upstream_gene_variant	Sobic.002G224800	MODIFIER	gibberellin receptor GID1L2
Chr02_62272397_62272495_DEL	0 (0/37)	0 (0/43)	0.06 (1/29)	0 (0/25)	0 (0/33)	0 (0/46)	0.94 (16/42)	0 (0/38)	2.3446e-16	0	7	downstream_gene_variant	Sobic.002G231200	MODIFIER	retrotransposon protein, unclassified
Chr02_62381085_62381202_DEL	0 (0/39)	0 (0/43)	0.05 (1/33)	0 (0/27)	0.05 (1/37)	0 (0/50)	0.89 (17/44)	0 (0/39)	1.36131e-16	0	7	upstream_gene_variant	Sobic.002G232800	MODIFIER	zinc finger, C3HC4 type domain containing protein
Chr02_62829903_62830319_DEL	0.74 (17/33)	0 (0/32)	0 (0/30)	0 (0/29)	0.22 (5/36)	0 (0/51)	0 (0/54)	0.04 (1/37)	5.37648e-19	0	1	upstream_gene_variant	Sobic.002G237900	MODIFIER	CSLE6 - cellulose synthase-like family E
Chr02_62834913_62835723_DEL	0.72 (18/32)	0 (0/31)	0 (0/30)	0 (0/29)	0.28 (7/35)	0 (0/52)	0 (0/40)	0 (0/32)	1.24205e-19	0	1	intergenic_region	Sobic.002G237900-Sobic.002G238000	MODIFIER	glycerophosphoryl diester phosphodiesterase family protein
Chr02_62901349_62901836_DEL	0 (0/33)	0 (0/31)	0 (0/31)	0 (0/29)	0.25 (4/35)	0 (0/50)	0.75 (12/51)	0 (0/30)	2.71567e-07	0	7	upstream_gene_variant	Sobic.002G238600	MODIFIER
Chr02_64688869_64694088_DEL	0.12 (5/41)	0.03 (1/42)	0 (0/34)	0 (0/26)	0.05 (2/33)	0 (0/52)	0.03 (1/49)	0.78 (31/33)	6.56524e-38	0	8	upstream_gene_variant	Sobic.002G261600	MODIFIER	Os9bglu31 - beta-glucosidase, dhurrinase, similar to G. max hydroxyisourate hydrolase
Chr02_65934210_65935955_DEL	0.82 (33/34)	0 (0/37)	0.05 (2/33)	0 (0/31)	0.12 (5/35)	0 (0/56)	0 (0/43)	0 (0/33)	2.17407e-41	0	1	intergenic_region	Sobic.002G276600-Sobic.002G276700	MODIFIER	TKL_IRAK_DUF26-lc.25 - DUF26 kinases have homology to DUF26 containing loci& TKL_IRAK_DUF26-lc.24 - DUF26 kinases have homology to DUF26 containing loci
Chr02_66388524_66389289_DEL	0 (0/42)	0 (0/37)	0 (0/30)	0 (0/28)	0.07 (1/36)	0 (0/53)	0.93 (14/45)	0 (0/37)	1.43115e-13	0	7	upstream_gene_variant	Sobic.002G282600	MODIFIER	copper methylamine oxidase precursor
Chr02_67439851_67441166_DEL	0.83 (19/23)	0 (0/39)	0 (0/29)	0 (0/30)	0.17 (4/35)	0 (0/50)	0 (0/44)	0 (0/28)	8.46797e-34	0	1	downstream_gene_variant	Sobic.002G298600	MODIFIER	LTPL63 - Protease inhibitor/seed storage/LTP family protein precursor
Chr02_6967355_6968010_DEL	0.72 (18/32)	0.04 (1/28)	0.2 (5/31)	0 (0/28)	0 (0/31)	0.04 (1/56)	0 (0/42)	0 (0/31)	3.38634e-18	0	1	intron_variant	Sobic.002G069700	MODIFIER	expressed protein
Chr02_7031789_7033168_DEL	0 (0/32)	0.75 (12/35)	0 (0/31)	0 (0/29)	0 (0/32)	0.25 (4/50)	0 (0/39)	0 (0/30)	9.33053e-11	0	2	upstream_gene_variant	Sobic.002G070000	MODIFIER	OsFBX230 - F-box domain containing protein
Chr02_71121028_71121126_DEL	0.96 (26/33)	0 (0/43)	0 (0/36)	0 (0/24)	0.04 (1/35)	0 (0/48)	0 (0/49)	0 (0/35)	2.40296e-40	0	1	upstream_gene_variant	Sobic.002G344900	MODIFIER	MBTB21 - Bric-a-Brac, Tramtrack, Broad Complex BTB domain with Meprin and TRAF Homology MATH domain
Chr02_71638649_71639109_DEL	0.9 (28/37)	0 (0/41)	0 (0/29)	0 (0/30)	0.1 (3/35)	0 (0/49)	0 (0/47)	0 (0/35)	3.80975e-35	0	1	upstream_gene_variant	Sobic.002G353200	MODIFIER	BES1/BZR1 homolog protein
Chr02_71874936_71874995_DEL	0.81 (25/30)	0 (0/40)	0.03 (1/35)	0 (0/25)	0.16 (5/34)	0 (0/45)	0 (0/52)	0 (0/39)	5.13848e-35	0	1	upstream_gene_variant	Sobic.002G355600	MODIFIER
Chr02_71891263_71892139_DEL	0.78 (35/38)	0 (0/34)	0.02 (1/32)	0 (0/27)	0.16 (7/33)	0.04 (2/52)	0 (0/43)	0 (0/37)	6.48828e-35	0	1	5_prime_UTR_variant	Sobic.002G355900	MODIFIER	LTPL64 - Protease inhibitor/seed storage/LTP family protein precursor
Chr02_72319092_72319936_DEL	0 (0/38)	0 (0/39)	0.11 (2/32)	0.79 (15/20)	0.05 (1/31)	0 (0/56)	0.05 (1/51)	0 (0/37)	5.01099e-32	0	4	upstream_gene_variant	Sobic.002G361500	MODIFIER	OsGH3.8 - Probable indole-3-acetic acid-amido synthetase
Chr02_72381932_72382907_DEL	0 (0/35)	0.12 (4/34)	0.03 (1/29)	0.75 (24/30)	0.09 (3/31)	0 (0/55)	0 (0/45)	0 (0/31)	5.95347e-29	0	4	splice_region_variant	Sobic.002G362800	LOW	formin-like protein 20
Chr02_72459020_72459117_DEL	1 (18/34)	0 (0/41)	0 (0/34)	0 (0/26)	0 (0/36)	0 (0/47)	0 (0/51)	0 (0/36)	9.52136e-28	0	1	upstream_gene_variant	Sobic.002G363400	MODIFIER	BRASSINOSTEROID INSENSITIVE 1 precursor
Chr02_72496732_72498285_DEL	0 (0/36)	0 (0/34)	0.04 (1/31)	0.82 (23/31)	0.14 (4/32)	0 (0/51)	0 (0/38)	0 (0/32)	2.37341e-29	0	4	transcript_ablation	Sobic.002G363901	HIGH	late embryogenesis abundant (LEA) hydroxyproline-rich glycoprotein-related
Chr02_72949650_72949829_DEL	0 (0/38)	0.07 (1/38)	0 (0/32)	0 (0/25)	0.07 (1/29)	0 (0/49)	0 (0/41)	0.86 (12/28)	1.1952e-16	0	8	upstream_gene_variant	Sobic.002G370300	MODIFIER	pectinesterase
Chr02_73180537_73180697_DEL	0.94 (30/34)	0 (0/40)	0 (0/32)	0 (0/22)	0.06 (2/33)	0 (0/42)	0 (0/47)	0 (0/34)	1.62961e-40	0	1	downstream_gene_variant	Sobic.002G373900	MODIFIER	lung seven transmembrane domain containing protein
Chr02_73306049_73306327_DEL	0.93 (25/34)	0 (0/33)	0 (0/25)	0 (0/26)	0.07 (2/31)	0 (0/51)	0 (0/45)	0 (0/33)	5.60535e-32	0	1	intergenic_region	Sobic.002G375600-Sobic.002G375701	MODIFIER	scarecrow& transporter, major facilitator family& pre-mRNA-processing factor 31
Chr02_73555074_73555926_DEL	0.78 (29/32)	0 (0/40)	0 (0/29)	0 (0/16)	0.22 (8/34)	0 (0/50)	0 (0/47)	0 (0/34)	6.09986e-35	0	1	intergenic_region	Sobic.002G379300-Sobic.002G379400	MODIFIER	expressed protein& zinc finger family protein& RFC2 - Putative clamp loader of PCNA, replication factor C subunit 2
Chr02_74275238_74275704_DEL	0 (0/31)	0 (0/33)	0.05 (1/28)	0 (0/28)	0.25 (5/32)	0 (0/55)	0 (0/40)	0.7 (14/34)	4.66911e-13	0	8	splice_region_variant	Sobic.002G389100	LOW	cytochrome P450 72A1
Chr02_75117496_75119491_DEL	0 (0/26)	0 (0/32)	0 (0/30)	1 (16/28)	0 (0/33)	0 (0/55)	0 (0/44)	0 (0/31)	9.71649e-28	0	4	exon_loss_variant	Sobic.002G400200	HIGH	CS domain containing protein
Chr02_76136575_76140407_DEL	0.82 (31/37)	0.05 (2/31)	0 (0/29)	0 (0/30)	0.08 (3/34)	0.03 (1/55)	0.03 (1/41)	0 (0/31)	1.12898e-31	0	1	upstream_gene_variant	Sobic.002G413900	MODIFIER
Chr02_76145568_76145700_DEL	0.83 (19/27)	0.04 (1/39)	0 (0/31)	0 (0/22)	0.13 (3/35)	0 (0/46)	0 (0/46)	0 (0/38)	3.4265e-28	0	1	downstream_gene_variant	Sobic.002G414000	MODIFIER
Chr02_76371652_76372004_DEL	0.84 (26/36)	0 (0/35)	0 (0/30)	0 (0/25)	0.16 (5/35)	0 (0/50)	0 (0/47)	0 (0/32)	2.11831e-29	0	1	intergenic_region	Sobic.002G416400-Sobic.002G416500	MODIFIER	stem-specific protein TSJT1
Chr02_76483081_76483160_DEL	0.06 (2/37)	0.03 (1/39)	0 (0/35)	0 (0/22)	0.19 (6/31)	0 (0/47)	0 (0/49)	0.72 (23/27)	3.07099e-30	0	8	intergenic_region	Sobic.002G417500-Sobic.002G417600	MODIFIER	RNA recognition motif containing protein& L-asparaginase precursor protein& potasium efflux antiporter protein
Chr02_76875114_76875215_DEL	0.89 (25/35)	0 (0/37)	0 (0/33)	0 (0/24)	0.11 (3/34)	0 (0/42)	0 (0/47)	0 (0/35)	9.54603e-31	0	1	upstream_gene_variant	Sobic.002G421350	MODIFIER
Chr02_76911060_76911471_DEL	0.83 (30/36)	0 (0/38)	0 (0/33)	0 (0/30)	0.14 (5/36)	0 (0/50)	0 (0/49)	0.03 (1/29)	2.98497e-35	0	1	upstream_gene_variant	Sobic.002G421700	MODIFIER	OsFBX368 - F-box domain containing protein
Chr02_7872517_7872607_DEL	0.76 (13/33)	0 (0/43)	0 (0/36)	0 (0/26)	0.18 (3/38)	0 (0/50)	0 (0/53)	0.06 (1/35)	4.26579e-15	0	1	upstream_gene_variant	Sobic.002G075800	MODIFIER	uncharacterized glycosyltransferase
Chr02_8720594_8720729_DEL	0.79 (19/29)	0.04 (1/41)	0.04 (1/35)	0 (0/25)	0.12 (3/30)	0 (0/47)	0 (0/54)	0 (0/32)	2.09629e-25	0	1	downstream_gene_variant	Sobic.002G082100	MODIFIER	serine/threonine-protein kinase
Chr03_10185179_10185275_DEL	0 (0/30)	0 (0/42)	0 (0/32)	0 (0/24)	0.06 (1/34)	0 (0/53)	0.12 (2/51)	0.82 (14/30)	2.06447e-18	0	8	downstream_gene_variant	Sobic.003G113200	MODIFIER	5-nucleotidase domain-containing protein
Chr03_1153694_1153772_DEL	0.93 (14/31)	0 (0/39)	0 (0/35)	0 (0/22)	0.07 (1/32)	0 (0/39)	0 (0/48)	0 (0/34)	1.9402e-19	0	1	intergenic_region	Sobic.003G012800-Sobic.003G012900	MODIFIER	stress-induced protein& harpin-induced protein 1 domain containing protein& harpin-induced protein 1 domain containing protein
Chr03_12044759_12044819_DEL	0.94 (16/27)	0 (0/39)	0 (0/32)	0 (0/23)	0.06 (1/34)	0 (0/42)	0 (0/48)	0 (0/37)	3.50758e-27	0	1	downstream_gene_variant	Sobic.003G129100	MODIFIER	MYB family transcription factor
Chr03_12052461_12052560_DEL	0.96 (24/35)	0 (0/38)	0 (0/28)	0 (0/24)	0.04 (1/34)	0 (0/44)	0 (0/46)	0 (0/35)	1.05864e-31	0	1	intergenic_region	Sobic.003G129100-Sobic.003G129200	MODIFIER	expressed protein
Chr03_12631949_12632102_DEL	0.73 (24/31)	0.03 (1/40)	0 (0/34)	0.06 (2/26)	0.15 (5/34)	0.03 (1/49)	0 (0/49)	0 (0/35)	1.07039e-27	0	1	downstream_gene_variant	Sobic.003G134201	MODIFIER
Chr03_138779_140253_DEL	0 (0/39)	0 (0/41)	0 (0/33)	0 (0/28)	0.14 (3/34)	0.05 (1/52)	0.82 (18/49)	0 (0/35)	1.14206e-13	0	7	upstream_gene_variant	Sobic.003G001300	MODIFIER	ZOS1-05 - C2H2 zinc finger protein
Chr03_13886379_13887466_DEL	0.04 (1/34)	0 (0/41)	0 (0/30)	0 (0/28)	0.13 (3/37)	0 (0/49)	0.13 (3/50)	0.7 (16/34)	5.00345e-15	0	8	upstream_gene_variant	Sobic.003G141550	MODIFIER	expressed protein
Chr03_14040110_14040506_DEL	0.94 (34/39)	0 (0/36)	0 (0/27)	0 (0/30)	0.06 (2/34)	0 (0/51)	0 (0/41)	0 (0/31)	2.79545e-40	0	1	downstream_gene_variant	Sobic.003G141700	MODIFIER	50S ribosomal protein L15
Chr03_16202120_16215584_DEL	0.83 (20/38)	0 (0/30)	0 (0/30)	0 (0/31)	0.12 (3/29)	0 (0/54)	0 (0/42)	0.04 (1/31)	9.6599e-20	0	1	upstream_gene_variant	Sobic.003G152400	MODIFIER	WD domain containing protein
Chr03_17051785_17051865_DEL	0 (0/37)	0 (0/40)	0 (0/31)	0 (0/28)	0.12 (2/33)	0 (0/47)	0.18 (3/49)	0.71 (12/26)	3.32393e-15	0	8	intergenic_region	Sobic.003G155400-Sobic.003G155600	MODIFIER	galactosyltransferase family protein& galactosyltransferase family protein& nucleolar protein NOP5
Chr03_1941778_1942880_DEL	0 (0/32)	0 (0/32)	0 (0/30)	0 (0/30)	0.07 (1/29)	0 (0/52)	0.07 (1/38)	0.86 (12/35)	2.45818e-12	0	8	downstream_gene_variant	Sobic.003G022600	MODIFIER	amino acid permease family protein
Chr03_1983277_1983362_DEL	0.86 (18/29)	0 (0/40)	0 (0/30)	0 (0/24)	0.14 (3/31)	0 (0/47)	0 (0/46)	0 (0/35)	1.53567e-25	0	1	downstream_gene_variant	Sobic.003G022900	MODIFIER	RNA recognition motif containing protein
Chr03_19944704_19944831_DEL	0 (0/39)	0.09 (2/41)	0.09 (2/34)	0 (0/18)	0 (0/37)	0.74 (17/33)	0.04 (1/50)	0.04 (1/35)	1.51557e-16	0	6	downstream_gene_variant	Sobic.003G162400	MODIFIER	expressed protein
Chr03_2023208_2023552_DEL	1 (25/32)	0 (0/35)	0 (0/28)	0 (0/29)	0 (0/32)	0 (0/51)	0 (0/47)	0 (0/34)	1.14778e-39	0	1	upstream_gene_variant	Sobic.003G023400	MODIFIER	SCAR-like protein 2
Chr03_2095962_2096053_DEL	0.95 (18/30)	0 (0/42)	0 (0/34)	0 (0/25)	0.05 (1/37)	0 (0/45)	0 (0/53)	0 (0/36)	9.09486e-30	0	1	upstream_gene_variant	Sobic.003G024600	MODIFIER	CAMK_KIN1/SNF1/Nim1_like.7 - CAMK includes calcium/calmodulin depedent protein kinases
Chr03_21231991_21234040_DEL	1 (28/35)	0 (0/36)	0 (0/29)	0 (0/31)	0 (0/31)	0 (0/53)	0 (0/36)	0 (0/34)	1.14778e-39	0	1	intergenic_region	Sobic.003G164800-Sobic.003G164950	MODIFIER	thioesterase family protein& lipoxygenase& nodulin
Chr03_21371862_21373011_DEL	0.81 (21/35)	0.15 (4/37)	0 (0/30)	0 (0/28)	0.04 (1/34)	0 (0/53)	0 (0/51)	0 (0/32)	7.9781e-24	0	1	intergenic_region	Sobic.003G164800-Sobic.003G164950	MODIFIER	thioesterase family protein& lipoxygenase& nodulin
Chr03_21673539_21673683_DEL	0 (0/33)	0.03 (1/41)	0.03 (1/33)	0 (0/27)	0 (0/33)	0.82 (27/40)	0.06 (2/48)	0.06 (2/33)	1.41209e-24	0	6	intergenic_region	Sobic.003G164800-Sobic.003G164950	MODIFIER	thioesterase family protein& lipoxygenase& nodulin
Chr03_2186279_2186781_DEL	0.91 (32/39)	0 (0/35)	0 (0/31)	0.03 (1/28)	0.03 (1/38)	0 (0/51)	0 (0/46)	0.03 (1/38)	1.11912e-38	0	1	downstream_gene_variant	Sobic.003G025800	MODIFIER
Chr03_2421998_2422111_DEL	0 (0/36)	0 (0/40)	0.07 (1/27)	0.73 (11/22)	0.13 (2/34)	0.07 (1/46)	0 (0/47)	0 (0/33)	3.20823e-17	0	4	upstream_gene_variant	Sobic.003G027500	MODIFIER	protein kinase domain containing protein
Chr03_25123248_25123343_DEL	0.84 (26/34)	0.13 (4/42)	0 (0/31)	0 (0/24)	0.03 (1/33)	0 (0/47)	0 (0/48)	0 (0/37)	8.37239e-32	0	1	intergenic_region	Sobic.003G166200-Sobic.003G166300	MODIFIER	ATMAP70 protein& CK1_CaseinKinase_1a.5 - CK1 includes the casein kinase 1 kinases& sodium/hydrogen exchanger 7& expressed protein& sucrose transporter, putativ& AAA-type ATPase family protein& transcriptional repressor
Chr03_26750476_26753929_DEL	0 (0/32)	0.26 (6/32)	0.7 (16/35)	0.04 (1/30)	0 (0/32)	0 (0/51)	0 (0/43)	0 (0/27)	9.10416e-15	0	3	intergenic_region	Sobic.003G167200-Sobic.003G167300	MODIFIER	ankyrin repeat family protein& expressed protein& retrotransposon protein, unclassified& expressed protein
Chr03_2984149_2986843_DEL	0.83 (25/35)	0 (0/33)	0 (0/28)	0 (0/29)	0.17 (5/32)	0 (0/53)	0 (0/39)	0 (0/32)	5.57341e-28	0	1	exon_loss_variant	Sobic.003G032301	HIGH
Chr03_30461287_30461365_DEL	0.82 (27/35)	0.12 (4/42)	0 (0/31)	0 (0/24)	0.06 (2/36)	0 (0/49)	0 (0/48)	0 (0/33)	4.02467e-31	0	1	intergenic_region	Sobic.003G170200-Sobic.003G170300	MODIFIER	retinoblastoma-related protein-like& expressed protein& expressed protein
Chr03_3064772_3065116_DEL	0.83 (29/36)	0 (0/30)	0 (0/30)	0 (0/27)	0.09 (3/34)	0.06 (2/47)	0.03 (1/48)	0 (0/34)	5.40711e-31	0	1	upstream_gene_variant	Sobic.003G033300	MODIFIER	expressed protein
Chr03_3217752_3217831_DEL	0.93 (26/30)	0 (0/42)	0 (0/36)	0 (0/25)	0.07 (2/36)	0 (0/49)	0 (0/51)	0 (0/36)	1.26834e-43	0	1	upstream_gene_variant	Sobic.003G035200	MODIFIER	profilin domain containing protein
Chr03_32923872_32934956_DEL	0.97 (29/34)	0 (0/34)	0 (0/28)	0 (0/27)	0.03 (1/33)	0 (0/51)	0 (0/43)	0 (0/35)	8.76556e-41	0	1	intergenic_region	Sobic.003G170800-Sobic.003G170900	MODIFIER	LSM domain containing protein& mitochondrial import inner membrane translocase subunit Tim& leucine rich repeat protein
Chr03_3639138_3640790_DEL	0.7 (30/34)	0 (0/43)	0 (0/31)	0.19 (8/26)	0.12 (5/32)	0 (0/55)	0 (0/46)	0 (0/34)	2.84972e-32	0	1	intergenic_region	Sobic.003G038800-Sobic.003G038901	MODIFIER	BRASSINOSTEROID INSENSITIVE 1 precursor
Chr03_36916972_36920360_DEL	0.96 (27/33)	0 (0/40)	0 (0/29)	0 (0/30)	0.04 (1/32)	0 (0/54)	0 (0/49)	0 (0/33)	1.40589e-41	0	1	intergenic_region	Sobic.003G171300-Sobic.003G171400	MODIFIER	clathrin assembly protein
Chr03_3739983_3743217_DEL	0.9 (35/38)	0 (0/31)	0 (0/30)	0 (0/28)	0.1 (4/31)	0 (0/56)	0 (0/45)	0 (0/28)	4.26846e-40	0	1	splice_acceptor_variant&splice_region_variant&5_prime_UTR_variant&intron_variant	Sobic.003G040200	HIGH	expressed protein
Chr03_3743492_3743679_DEL	0.88 (14/31)	0 (0/34)	0 (0/33)	0 (0/26)	0.12 (2/33)	0 (0/48)	0 (0/39)	0 (0/34)	7.34815e-18	0	1	downstream_gene_variant	Sobic.003G040300	MODIFIER	cytochrome P450
Chr03_3862156_3863087_DEL	0.9 (36/38)	0 (0/29)	0 (0/26)	0 (0/30)	0.1 (4/31)	0 (0/53)	0 (0/41)	0 (0/30)	8.48858e-40	0	1	downstream_gene_variant	Sobic.003G041400	MODIFIER	aminoacyl-tRNA synthetase
Chr03_40051260_40070654_DEL	0 (0/33)	0.07 (1/32)	0.93 (14/34)	0 (0/29)	0 (0/32)	0 (0/54)	0 (0/43)	0 (0/32)	5.25149e-18	0	3	intergenic_region	Sobic.003G173600-Sobic.003G173700	MODIFIER	cytochrome P450
Chr03_4114694_4114794_DEL	0.92 (24/28)	0 (0/41)	0 (0/34)	0 (0/27)	0.08 (2/34)	0 (0/45)	0 (0/51)	0 (0/36)	1.09388e-41	0	1	splice_region_variant	Sobic.003G044900	LOW	OsIAA15 - Auxin-responsive Aux/IAA gene family member
Chr03_41889652_41889704_DEL	0.96 (23/30)	0 (0/40)	0 (0/33)	0 (0/23)	0.04 (1/34)	0 (0/42)	0 (0/48)	0 (0/34)	1.70362e-36	0	1	intergenic_region	Sobic.003G174425-Sobic.003G174450	MODIFIER	splicing factor, arginine/serine-rich& splicing factor, arginine/serine-rich 7& ribosomal protein L13
Chr03_41918611_41918668_DEL	0.95 (21/27)	0 (0/40)	0 (0/33)	0 (0/21)	0.05 (1/32)	0 (0/43)	0 (0/47)	0 (0/35)	1.89643e-36	0	1	intergenic_region	Sobic.003G174425-Sobic.003G174450	MODIFIER	splicing factor, arginine/serine-rich& splicing factor, arginine/serine-rich 7& ribosomal protein L13
Chr03_45633260_45638988_DEL	0.97 (29/39)	0 (0/33)	0 (0/28)	0 (0/30)	0.03 (1/33)	0 (0/56)	0 (0/43)	0 (0/33)	6.22748e-36	0	1	frameshift_variant&start_lost&splice_region_variant	Sobic.003G178400	HIGH
Chr03_458420_458831_DEL	0.93 (14/31)	0 (0/34)	0 (0/31)	0 (0/29)	0.07 (1/34)	0 (0/56)	0 (0/48)	0 (0/29)	1.74786e-20	0	1	upstream_gene_variant	Sobic.003G005000	MODIFIER	expressed protein
Chr03_45954507_45954614_DEL	0.96 (23/33)	0 (0/40)	0 (0/28)	0 (0/24)	0.04 (1/37)	0 (0/47)	0 (0/46)	0 (0/36)	1.79136e-33	0	1	downstream_gene_variant	Sobic.003G178700	MODIFIER	3-ketoacyl-CoA synthase
Chr03_46113321_46115093_DEL	1 (19/31)	0 (0/35)	0 (0/27)	0 (0/28)	0 (0/32)	0 (0/54)	0 (0/41)	0 (0/32)	1.14717e-29	0	1	intergenic_region	Sobic.003G178700-Sobic.003G178800	MODIFIER	snurportin-1& expressed protein& peptide chain release factor protein
Chr03_47887334_47888968_DEL	0.91 (20/31)	0 (0/36)	0 (0/34)	0 (0/26)	0.09 (2/36)	0 (0/48)	0 (0/40)	0 (0/36)	1.18862e-28	0	1	upstream_gene_variant	Sobic.003G181600	MODIFIER	early-responsive to dehydration protein-related
Chr03_49104662_49104762_DEL	0 (0/36)	0.08 (1/40)	0.77 (10/31)	0.08 (1/20)	0 (0/33)	0.08 (1/37)	0 (0/48)	0 (0/34)	3.11799e-10	0	3	downstream_gene_variant	Sobic.003G184500	MODIFIER	carboxyl-terminal peptidase
Chr03_49109731_49110194_DEL	0.92 (24/35)	0 (0/31)	0 (0/30)	0 (0/29)	0.04 (1/31)	0 (0/55)	0 (0/41)	0.04 (1/31)	6.35991e-30	0	1	upstream_gene_variant	Sobic.003G184500	MODIFIER	carboxyl-terminal peptidase
Chr03_49556589_49557620_DEL	0.88 (14/31)	0 (0/36)	0.06 (1/32)	0 (0/28)	0.06 (1/29)	0 (0/54)	0 (0/42)	0 (0/30)	5.4411e-18	0	1
Chr03_49902619_49902714_DEL	0.95 (18/30)	0 (0/40)	0 (0/36)	0 (0/30)	0.05 (1/35)	0 (0/49)	0 (0/47)	0 (0/34)	1.18413e-29	0	1	downstream_gene_variant	Sobic.003G185400	MODIFIER
Chr03_51537202_51537545_DEL	0.24 (6/38)	0 (0/36)	0.04 (1/33)	0 (0/24)	0 (0/35)	0 (0/49)	0 (0/48)	0.72 (18/35)	4.4895e-18	0	8	upstream_gene_variant	Sobic.003G193400	MODIFIER	TKL_IRAK_DUF26-lh.10 - DUF26 kinases have homology to DUF26 containing loci
Chr03_51796721_51796789_DEL	0.72 (18/27)	0.08 (2/37)	0 (0/31)	0 (0/24)	0.12 (3/35)	0.04 (1/45)	0.04 (1/48)	0 (0/32)	1.74252e-21	0	1	downstream_gene_variant	Sobic.003G194500	MODIFIER	zinc finger C-x8-C-x5-C-x3-H type family protein
Chr03_52108166_52108816_DEL	0.71 (10/33)	0 (0/30)	0 (0/30)	0 (0/31)	0.29 (4/35)	0 (0/50)	0 (0/38)	0 (0/33)	1.05918e-09	0	1	intergenic_region	Sobic.003G196200-Sobic.003G196300	MODIFIER	expressed protein& O-acyltransferase& proteophosphoglycan ppg4& calmodulin-binding protein& OsGrx_C15 - glutaredoxin subgroup III
Chr03_53550768_53551839_DEL	0.05 (1/37)	0 (0/33)	0 (0/32)	0 (0/23)	0.05 (1/33)	0.05 (1/50)	0.09 (2/41)	0.77 (17/33)	3.79394e-17	0	8	downstream_gene_variant	Sobic.003G205200	MODIFIER	expressed protein
Chr03_53588484_53588905_DEL	0.04 (1/32)	0.08 (2/31)	0.04 (1/31)	0 (0/30)	0.08 (2/35)	0.73 (19/53)	0 (0/44)	0.04 (1/30)	4.31431e-09	0	6	downstream_gene_variant	Sobic.003G205600	MODIFIER	uncharacterized protein At4g06744 precursor
Chr03_53675429_53678900_DEL	0.71 (20/30)	0 (0/37)	0 (0/33)	0 (0/28)	0.18 (5/28)	0 (0/56)	0.07 (2/43)	0.04 (1/31)	1.5061e-22	0	1	upstream_gene_variant	Sobic.003G206300	MODIFIER	THION27 - Plant thionin family protein precursor
Chr03_5448742_5449088_DEL	0 (0/32)	0 (0/38)	0 (0/33)	0 (0/19)	0.08 (1/32)	0.92 (12/50)	0 (0/44)	0 (0/34)	1.34872e-08	0	6	upstream_gene_variant	Sobic.003G062500	MODIFIER	PHLOEM 2-LIKE A5
Chr03_54511639_54519879_DEL	0.89 (17/30)	0 (0/39)	0 (0/32)	0 (0/31)	0.11 (2/36)	0 (0/52)	0 (0/46)	0 (0/35)	4.73155e-26	0	1	intergenic_region	Sobic.003G211400-Sobic.003G211600	MODIFIER	RING-H2 finger protein& RING-H2 finger protein& OsFBX431 - F-box domain containing protein& OsFBL58 - F-box domain and LRR containing protein
Chr03_56998991_56999960_DEL	0.82 (28/34)	0 (0/35)	0 (0/30)	0 (0/29)	0.18 (6/33)	0 (0/55)	0 (0/42)	0 (0/29)	2.69724e-33	0	1	upstream_gene_variant	Sobic.003G230400	MODIFIER	50S ribosomal protein L31
Chr03_57275987_57276068_DEL	0.85 (22/29)	0 (0/42)	0 (0/36)	0 (0/28)	0.15 (4/39)	0 (0/50)	0 (0/52)	0 (0/38)	1.51706e-35	0	1	intergenic_region	Sobic.003G233800-Sobic.003G233900	MODIFIER	OsFBX409 - F-box domain containing protein& cytochrome P450
Chr03_5740338_5742647_DEL	0.94 (16/23)	0 (0/34)	0 (0/34)	0 (0/29)	0.06 (1/34)	0 (0/51)	0 (0/45)	0 (0/29)	1.62408e-32	0	1	upstream_gene_variant	Sobic.003G067600	MODIFIER	receptor kinase
Chr03_57455270_57455392_DEL	0.88 (15/30)	0 (0/41)	0 (0/30)	0 (0/19)	0.12 (2/35)	0 (0/50)	0 (0/46)	0 (0/34)	6.72715e-21	0	1	intron_variant	Sobic.003G235900	MODIFIER	homeobox associated leucine zipper
Chr03_5750869_5751238_DEL	0 (0/31)	0 (0/35)	0.06 (1/30)	0 (0/24)	0 (0/35)	0.06 (1/47)	0.82 (14/45)	0.06 (1/35)	7.07776e-10	0	7	bidirectional_gene_fusion	Sobic.003G067800&Sobic.003G067900	HIGH	universal stress protein domain containing protein
Chr03_58905552_58906388_DEL	0.06 (1/31)	0 (0/27)	0 (0/28)	0 (0/29)	0.81 (13/34)	0 (0/50)	0.12 (2/52)	0 (0/29)	3.83198e-13	0	5	upstream_gene_variant	Sobic.003G250600	MODIFIER	OsGrx_I1 - glutaredoxin subgroup III
Chr03_59945042_59945155_DEL	1 (14/32)	0 (0/41)	0 (0/34)	0 (0/26)	0 (0/37)	0 (0/50)	0 (0/50)	0 (0/37)	6.59504e-23	0	1	upstream_gene_variant	Sobic.003G261566	MODIFIER	zinc-binding alcohol dehydrogenase domain-containing protein 2
Chr03_60415693_60415757_DEL	0.93 (25/31)	0 (0/42)	0 (0/32)	0 (0/25)	0.04 (1/34)	0 (0/49)	0 (0/49)	0.04 (1/37)	5.2214e-39	0	1	upstream_gene_variant	Sobic.003G267600	MODIFIER	potassium channel protein
Chr03_60679887_60679974_DEL	0 (0/38)	0 (0/40)	0.05 (1/33)	0 (0/27)	0 (0/34)	0 (0/47)	0.95 (19/42)	0 (0/34)	3.45109e-20	0	7	upstream_gene_variant	Sobic.003G270200	MODIFIER	dehydrin family protein
Chr03_60921547_60921685_DEL	0 (0/40)	0.04 (1/43)	0 (0/34)	0.04 (1/29)	0.07 (2/39)	0.78 (21/29)	0.07 (2/48)	0 (0/36)	9.26061e-28	0	6	downstream_gene_variant	Sobic.003G273200	MODIFIER	helix-loop-helix DNA-binding domain containing protein
Chr03_6121798_6121966_DEL	0 (0/35)	0.73 (16/35)	0 (0/33)	0.05 (1/22)	0.18 (4/32)	0.05 (1/50)	0 (0/49)	0 (0/32)	8.01448e-15	0	2	intron_variant	Sobic.003G072100	MODIFIER	D-mannose binding lectin family protein
Chr03_61430054_61430129_DEL	0.83 (25/29)	0.03 (1/41)	0.03 (1/32)	0 (0/26)	0.1 (3/37)	0 (0/49)	0 (0/48)	0 (0/38)	3.10554e-37	0	1	upstream_gene_variant	Sobic.003G278300	MODIFIER	transcription factor like protein
Chr03_61808727_61809460_DEL	0.81 (35/40)	0 (0/27)	0 (0/28)	0 (0/29)	0.14 (6/36)	0.05 (2/54)	0 (0/40)	0 (0/31)	1.02643e-32	0	1	downstream_gene_variant	Sobic.003G284000	MODIFIER	CAMK_KIN1/SNF1/Nim1_like_AMPKh.3 - CAMK includes calcium/calmodulin depedent protein kinases
Chr03_62139664_62139723_DEL	0 (0/41)	0.07 (1/39)	0.07 (1/26)	0 (0/25)	0 (0/34)	0 (0/44)	0.8 (12/39)	0.07 (1/33)	9.71634e-10	0	7	intergenic_region	Sobic.003G288200-Sobic.003G288300	MODIFIER	expressed protein& expressed protein& expressed protein
Chr03_63622496_63622626_DEL	0.72 (23/27)	0.09 (3/40)	0 (0/33)	0.03 (1/28)	0.16 (5/36)	0 (0/47)	0 (0/50)	0 (0/37)	4.39327e-31	0	1	downstream_gene_variant	Sobic.003G307100	MODIFIER	serpin domain containing protein
Chr03_63625899_63627583_DEL	0.75 (30/34)	0.1 (4/30)	0 (0/32)	0 (0/29)	0.12 (5/33)	0.03 (1/52)	0 (0/44)	0 (0/33)	4.4451e-31	0	1	splice_region_variant	Sobic.003G307100	LOW	serpin domain containing protein
Chr03_64100142_64100250_DEL	0.95 (19/32)	0 (0/43)	0 (0/34)	0 (0/26)	0.05 (1/36)	0 (0/53)	0 (0/50)	0 (0/38)	1.81617e-30	0	1	upstream_gene_variant	Sobic.003G312700	MODIFIER	glycosyl hydrolase family 47 domain contain protein
Chr03_65587319_65587794_DEL	0.71 (25/36)	0 (0/40)	0 (0/34)	0 (0/30)	0.23 (8/35)	0 (0/50)	0 (0/43)	0.06 (2/33)	3.7495e-25	0	1	intergenic_region	Sobic.003G331000-Sobic.003G331100	MODIFIER	expressed protein& phospholipid-transporting ATPase
Chr03_67202813_67202941_DEL	0.74 (20/29)	0 (0/42)	0 (0/35)	0 (0/26)	0.11 (3/33)	0.07 (2/46)	0.04 (1/49)	0.04 (1/36)	1.18322e-24	0	1	upstream_gene_variant	Sobic.003G353000	MODIFIER	WRKY56
Chr03_67506218_67506955_DEL	0.78 (29/34)	0.03 (1/32)	0 (0/29)	0 (0/28)	0.11 (4/32)	0.05 (2/55)	0 (0/41)	0.03 (1/27)	6.89415e-30	0	1	upstream_gene_variant	Sobic.003G356800	MODIFIER	universal stress protein domain containing protein
Chr03_67537381_67537464_DEL	0.9 (18/31)	0 (0/42)	0 (0/36)	0 (0/28)	0 (0/35)	0 (0/47)	0 (0/50)	0.1 (2/35)	3.80241e-27	0	1	upstream_gene_variant	Sobic.003G357000	MODIFIER
Chr03_67807793_67808391_DEL	0 (0/35)	0.23 (3/36)	0.77 (10/29)	0 (0/25)	0 (0/30)	0 (0/56)	0 (0/42)	0 (0/28)	6.12282e-12	0	3	splice_region_variant	Sobic.003G360500	LOW	glycosyl transferase
Chr03_68393097_68393494_DEL	0.91 (20/36)	0 (0/35)	0 (0/31)	0.05 (1/30)	0.05 (1/33)	0 (0/51)	0 (0/40)	0 (0/29)	2.03454e-23	0	1	upstream_gene_variant	Sobic.003G368100	MODIFIER	transferase family protein
Chr03_68395872_68396462_DEL	0.89 (24/39)	0 (0/37)	0 (0/27)	0.04 (1/29)	0.04 (1/34)	0 (0/47)	0 (0/36)	0.04 (1/29)	4.13577e-24	0	1
Chr03_68538430_68538895_DEL	0.81 (22/35)	0.04 (1/30)	0.04 (1/28)	0 (0/29)	0.11 (3/31)	0 (0/54)	0 (0/39)	0 (0/34)	7.18372e-23	0	1	upstream_gene_variant	Sobic.003G369200	MODIFIER	POLA1 - Putative DNA polymerase alpha catalytic subunit
Chr03_68569831_68569931_DEL	0.9 (18/26)	0 (0/44)	0 (0/34)	0 (0/24)	0.05 (1/34)	0 (0/52)	0 (0/50)	0.05 (1/37)	5.46986e-33	0	1	downstream_gene_variant	Sobic.003G369600	MODIFIER	CorA-like magnesium transporter protein
Chr03_68571140_68571209_DEL	0.86 (24/31)	0 (0/41)	0 (0/29)	0 (0/21)	0.07 (2/35)	0 (0/41)	0 (0/49)	0.07 (2/36)	1.17318e-31	0	1	downstream_gene_variant	Sobic.003G369600	MODIFIER	CorA-like magnesium transporter protein
Chr03_69128405_69128474_DEL	0.78 (14/27)	0 (0/41)	0 (0/31)	0 (0/26)	0.22 (4/32)	0 (0/45)	0 (0/48)	0 (0/35)	1.06945e-19	0	1	downstream_gene_variant	Sobic.003G376700	MODIFIER	glycosyl transferase
Chr03_69443417_69443900_DEL	0.93 (13/32)	0 (0/36)	0 (0/29)	0 (0/30)	0.07 (1/32)	0 (0/53)	0 (0/39)	0 (0/32)	2.48838e-17	0	1	upstream_gene_variant	Sobic.003G380900	MODIFIER	AP2 domain containing protein
Chr03_70230945_70231066_DEL	0.79 (11/30)	0 (0/37)	0 (0/30)	0 (0/26)	0.14 (2/34)	0 (0/44)	0 (0/50)	0.07 (1/36)	6.80523e-13	0	1	downstream_gene_variant	Sobic.003G391000	MODIFIER	lipase
Chr03_70382240_70382356_DEL	0.83 (20/34)	0 (0/42)	0 (0/31)	0 (0/24)	0.17 (4/34)	0 (0/44)	0 (0/51)	0 (0/35)	3.56193e-24	0	1	intron_variant	Sobic.003G392600	MODIFIER	expressed protein
Chr03_7163852_7163953_DEL	0.08 (2/37)	0 (0/40)	0 (0/33)	0 (0/24)	0.12 (3/36)	0 (0/44)	0.08 (2/50)	0.73 (19/25)	6.86847e-27	0	8	3_prime_UTR_variant	Sobic.003G083400	MODIFIER	cytoskeletal protein
Chr03_73036722_73037005_DEL	0 (0/35)	0 (0/34)	0.12 (2/29)	0.76 (13/23)	0 (0/30)	0.12 (2/44)	0 (0/50)	0 (0/33)	4.03175e-20	0	4	upstream_gene_variant	Sobic.003G426600	MODIFIER	glutathione S-transferase
Chr03_73461428_73461502_DEL	0 (0/41)	0.16 (3/41)	0 (0/34)	0 (0/25)	0.05 (1/33)	0.79 (15/44)	0 (0/50)	0 (0/37)	5.69054e-12	0	6	upstream_gene_variant	Sobic.003G432200	MODIFIER
Chr03_73708017_73712592_DEL	0 (0/37)	0.05 (2/36)	0 (0/29)	0 (0/31)	0 (0/35)	0.84 (36/51)	0.07 (3/46)	0.05 (2/35)	1.934e-26	0	6	exon_loss_variant	Sobic.003G435900	HIGH	disease resistance protein RPS2
Chr03_73750249_73750359_DEL	0 (0/41)	0 (0/41)	0 (0/35)	0 (0/25)	0.04 (1/33)	0.92 (24/35)	0 (0/48)	0.04 (1/35)	3.02244e-31	0	6	upstream_gene_variant	Sobic.003G436700	MODIFIER	40S ribosomal protein S10
Chr03_73755369_73755638_DEL	0.89 (17/33)	0 (0/33)	0 (0/29)	0 (0/25)	0.11 (2/36)	0 (0/53)	0 (0/41)	0 (0/35)	1.33707e-21	0	1	splice_acceptor_variant&splice_region_variant&5_prime_UTR_variant&intron_variant	Sobic.003G436800	HIGH	luteolin triglucuronide degradation
Chr03_73917294_73917732_DEL	0 (0/36)	0 (0/35)	0.04 (2/27)	0 (0/26)	0.02 (1/37)	0.76 (35/55)	0.11 (5/42)	0.07 (3/35)	3.42297e-19	0	6	upstream_gene_variant	Sobic.003G439700	MODIFIER	ATXR
Chr03_8702883_8703613_DEL	0.74 (29/32)	0 (0/31)	0 (0/31)	0.08 (3/28)	0.18 (7/30)	0 (0/55)	0 (0/45)	0 (0/28)	5.28495e-32	0	1	exon_loss_variant&splice_acceptor_variant&splice_donor_variant&3_prime_UTR_truncation&exon_loss_variant&splice_region_variant&intron_variant	Sobic.003G098650	HIGH
Chr03_8737184_8737624_DEL	0 (0/38)	0 (0/34)	0 (0/28)	0.12 (3/27)	0.04 (1/29)	0.8 (20/51)	0.04 (1/44)	0 (0/32)	3.40294e-12	0	6	upstream_gene_variant	Sobic.003G099100	MODIFIER	transposon protein, unclassified
Chr03_9466771_9467860_DEL	0 (0/38)	0.75 (12/31)	0 (0/31)	0 (0/28)	0.12 (2/31)	0.12 (2/43)	0 (0/46)	0 (0/32)	2.16718e-12	0	2	intergenic_region	Sobic.003G104900-Sobic.003G105000	MODIFIER	citrate-binding protein precursor& GDSL-like lipase/acylhydrolase
Chr04_10285357_10285424_DEL	0.87 (13/35)	0 (0/41)	0 (0/34)	0 (0/22)	0.13 (2/34)	0 (0/45)	0 (0/50)	0 (0/36)	3.46648e-15	0	1	upstream_gene_variant	Sobic.004G107400	MODIFIER	expressed protein
Chr04_10343140_10343499_DEL	0 (0/35)	0 (0/41)	0 (0/33)	0 (0/24)	0 (0/36)	0 (0/45)	1 (16/50)	0 (0/35)	1.6008e-14	0	7	intron_variant	Sobic.004G107800	MODIFIER	1,3-beta-glucan synthase component domain containing protein
Chr04_10440487_10440575_DEL	0.06 (1/41)	0.76 (13/35)	0.06 (1/35)	0 (0/24)	0 (0/33)	0.12 (2/49)	0 (0/51)	0 (0/37)	5.69912e-13	0	2	intergenic_region	Sobic.004G108400-Sobic.004G108501	MODIFIER
Chr04_10441034_10443439_DEL	0.93 (14/34)	0 (0/36)	0 (0/27)	0 (0/31)	0.07 (1/36)	0 (0/51)	0 (0/40)	0 (0/38)	2.60328e-18	0	1	intergenic_region	Sobic.004G108400-Sobic.004G108501	MODIFIER
Chr04_108732_108801_DEL	0.92 (24/29)	0 (0/38)	0 (0/32)	0 (0/26)	0.08 (2/34)	0 (0/42)	0 (0/48)	0 (0/35)	5.03967e-38	0	1	intergenic_region	Sobic.004G001100-Sobic.004G001200	MODIFIER
Chr04_11175830_11181040_DEL	0.05 (2/35)	0 (0/32)	0 (0/32)	0 (0/31)	0.18 (7/33)	0 (0/56)	0 (0/42)	0.76 (29/35)	1.45845e-31	0	8	intron_variant	Sobic.004G113300	MODIFIER	cyclic nucleotide-gated ion channel 1
Chr04_11667990_11668951_DEL	0 (0/40)	0 (0/36)	0.26 (9/31)	0.71 (24/28)	0.03 (1/37)	0 (0/56)	0 (0/46)	0 (0/34)	1.19566e-34	0	4	downstream_gene_variant	Sobic.004G114800	MODIFIER	expressed protein
Chr04_12199351_12199829_DEL	0.77 (36/39)	0 (0/32)	0 (0/30)	0 (0/30)	0.19 (9/38)	0 (0/51)	0 (0/43)	0.04 (2/30)	3.13838e-34	0	1	upstream_gene_variant	Sobic.004G116500	MODIFIER	expressed protein
Chr04_12256481_12259278_DEL	0 (0/39)	0 (0/35)	0.06 (1/28)	0.94 (16/30)	0 (0/36)	0 (0/53)	0 (0/41)	0 (0/36)	1.34057e-25	0	4	exon_loss_variant	Sobic.004G117000	HIGH	xa1
Chr04_12907117_12910435_DEL	0.87 (13/30)	0 (0/39)	0 (0/31)	0 (0/23)	0.07 (1/36)	0 (0/56)	0 (0/49)	0.07 (1/36)	1.92869e-18	0	1	exon_loss_variant	Sobic.004G120000	HIGH	expansin precursor
Chr04_14475518_14477869_DEL	0.83 (30/37)	0 (0/33)	0 (0/30)	0 (0/30)	0.11 (4/35)	0 (0/52)	0 (0/40)	0.06 (2/33)	3.44098e-32	0	1	intergenic_region	Sobic.004G125100-Sobic.004G125200	MODIFIER
Chr04_15372510_15372677_DEL	0.83 (24/32)	0.03 (1/38)	0 (0/32)	0 (0/25)	0.1 (3/32)	0 (0/47)	0 (0/50)	0.03 (1/36)	2.67909e-30	0	1	intergenic_region	Sobic.004G127000-Sobic.004G127066	MODIFIER
Chr04_1563541_1563673_DEL	0.92 (24/33)	0 (0/41)	0 (0/31)	0 (0/27)	0.04 (1/34)	0.04 (1/51)	0 (0/46)	0 (0/38)	9.9897e-35	0	1	upstream_gene_variant	Sobic.004G019600	MODIFIER	histone deacetylase complex subunit SAP18
Chr04_16163702_16164168_DEL	0 (0/31)	0 (0/33)	0.08 (3/28)	0 (0/28)	0 (0/31)	0.82 (31/56)	0.05 (2/43)	0.05 (2/29)	4.68727e-17	0	6	intergenic_region	Sobic.004G128200-Sobic.004G128400	MODIFIER
Chr04_16307529_16307612_DEL	0.81 (17/31)	0 (0/41)	0 (0/34)	0 (0/23)	0.14 (3/31)	0 (0/47)	0 (0/51)	0.05 (1/37)	1.11064e-21	0	1	upstream_gene_variant	Sobic.004G128800	MODIFIER	FAD-binding and arabino-lactone oxidase domains containing protein
Chr04_16370842_16404069_DEL	0.77 (20/34)	0 (0/30)	0 (0/24)	0 (0/29)	0.15 (4/37)	0 (0/51)	0 (0/48)	0.08 (2/37)	5.05124e-21	0	1	upstream_gene_variant	Sobic.004G129100	MODIFIER	lipase class 3 family protein
Chr04_3475349_3479014_DEL	0.74 (37/40)	0.06 (3/30)	0.04 (2/28)	0 (0/29)	0.16 (8/34)	0 (0/52)	0 (0/38)	0 (0/29)	4.21632e-30	0	1	exon_loss_variant	Sobic.004G042400	HIGH	Myb/SANT-like DNA-binding domain
Chr04_38714060_38714134_DEL	0 (0/42)	0 (0/42)	0.06 (1/35)	0.88 (15/26)	0.06 (1/37)	0 (0/50)	0 (0/54)	0 (0/38)	6.61035e-29	0	4	intergenic_region	Sobic.004G138000-Sobic.004G138200	MODIFIER
Chr04_4008370_4008475_DEL	0.9 (18/29)	0 (0/42)	0 (0/35)	0 (0/24)	0.1 (2/33)	0 (0/44)	0 (0/51)	0 (0/36)	2.78442e-28	0	1	5_prime_UTR_variant	Sobic.004G049600	MODIFIER	formin
Chr04_4038863_4039502_DEL	0.86 (25/35)	0 (0/40)	0 (0/34)	0 (0/29)	0.14 (4/38)	0 (0/51)	0 (0/44)	0 (0/39)	1.4492e-32	0	1	5_prime_UTR_variant	Sobic.004G050000	MODIFIER	ubiquitin family protein
Chr04_40475797_40479874_DEL	0 (0/33)	0 (0/32)	0 (0/30)	0.87 (20/28)	0.13 (3/35)	0 (0/53)	0 (0/48)	0 (0/30)	3.64876e-31	0	4	intergenic_region	Sobic.004G139800-Sobic.004G139900	MODIFIER
Chr04_41333866_41333975_DEL	0 (0/43)	0 (0/44)	0 (0/35)	0.8 (12/19)	0.2 (3/36)	0 (0/52)	0 (0/52)	0 (0/39)	1.53011e-29	0	4	intergenic_region	Sobic.004G141000-Sobic.004G141100	MODIFIER
Chr04_43640594_43640697_DEL	0.83 (24/29)	0 (0/43)	0 (0/35)	0 (0/28)	0.1 (3/37)	0 (0/48)	0 (0/48)	0.07 (2/36)	4.69905e-36	0	1	intergenic_region	Sobic.004G144050-Sobic.004G144100	MODIFIER
Chr04_45543416_45543537_DEL	0.85 (23/28)	0.04 (1/39)	0 (0/31)	0 (0/26)	0.07 (2/33)	0 (0/48)	0 (0/49)	0.04 (1/36)	5.68025e-35	0	1	intergenic_region	Sobic.004G146500-Sobic.004G146600	MODIFIER
Chr04_45882524_45884672_DEL	0.76 (37/41)	0.02 (1/44)	0 (0/35)	0 (0/29)	0.18 (9/38)	0 (0/52)	0 (0/47)	0.04 (2/36)	1.47258e-36	0	1	intergenic_region	Sobic.004G146900-Sobic.004G147050	MODIFIER
Chr04_45885651_45926573_DEL	0.76 (25/29)	0 (0/35)	0 (0/34)	0 (0/31)	0.18 (6/36)	0 (0/56)	0 (0/50)	0.06 (2/32)	1.99551e-34	0	1	transcript_ablation	Sobic.004G147050	HIGH	retrotransposon protein, unclassified
Chr04_49336257_49336424_DEL	0 (0/35)	0 (0/40)	0.04 (1/30)	0.96 (22/25)	0 (0/29)	0 (0/47)	0 (0/49)	0 (0/36)	2.07374e-44	0	4	3_prime_UTR_variant	Sobic.004G156000	MODIFIER	dehydrogenase/reductase
Chr04_50461664_50462261_DEL	0.04 (1/35)	0 (0/32)	0 (0/27)	0 (0/30)	0.25 (7/33)	0 (0/52)	0 (0/42)	0.71 (20/31)	2.93697e-22	0	8	upstream_gene_variant	Sobic.004G158400	MODIFIER	AML1
Chr04_50620142_50626345_DEL	0 (0/35)	0.03 (1/43)	0.06 (2/30)	0.87 (27/29)	0 (0/33)	0.03 (1/49)	0 (0/47)	0 (0/32)	2.77026e-42	0	4	intergenic_region	Sobic.004G159733-Sobic.004G159866	MODIFIER
Chr04_50969537_50973391_DEL	0.79 (15/39)	0.05 (1/39)	0 (0/31)	0 (0/27)	0 (0/40)	0.16 (3/56)	0 (0/49)	0 (0/36)	1.16092e-14	0	1	upstream_gene_variant	Sobic.004G161301	MODIFIER
Chr04_51543951_51551603_DEL	0.94 (29/38)	0 (0/35)	0 (0/27)	0 (0/30)	0.06 (2/32)	0 (0/48)	0 (0/40)	0 (0/35)	4.33443e-34	0	1	upstream_gene_variant	Sobic.004G165700	MODIFIER	expressed protein
Chr04_51647710_51647784_DEL	0.89 (17/33)	0 (0/42)	0 (0/33)	0 (0/27)	0.11 (2/34)	0 (0/51)	0 (0/52)	0 (0/37)	5.90752e-24	0	1	upstream_gene_variant	Sobic.004G166700	MODIFIER	glycosyl hydrolases
Chr04_53093626_53093725_DEL	0.11 (2/38)	0 (0/42)	0 (0/34)	0 (0/26)	0.06 (1/32)	0 (0/45)	0 (0/49)	0.83 (15/30)	2.91823e-20	0	8	upstream_gene_variant	Sobic.004G178550	MODIFIER	OsFBX209 - F-box domain containing protein
Chr04_53704620_53704700_DEL	0.76 (25/29)	0 (0/43)	0 (0/34)	0 (0/26)	0.21 (7/32)	0 (0/48)	0 (0/53)	0.03 (1/37)	4.05648e-35	0	1	bidirectional_gene_fusion	Sobic.004G183600&Sobic.004G183701	HIGH	molybdenum cofactor biosynthesis protein 1
Chr04_54586248_54587426_DEL	0.87 (20/26)	0 (0/34)	0 (0/33)	0 (0/30)	0.13 (3/37)	0 (0/54)	0 (0/47)	0 (0/31)	1.8175e-34	0	1	upstream_gene_variant	Sobic.004G194100	MODIFIER	expressed protein
Chr04_54655338_54655507_DEL	0.76 (22/35)	0 (0/41)	0 (0/33)	0.03 (1/25)	0.21 (6/30)	0 (0/46)	0 (0/44)	0 (0/33)	7.20896e-23	0	1	upstream_gene_variant	Sobic.004G195300	MODIFIER	expressed protein
Chr04_54714134_54716212_DEL	0.78 (21/37)	0 (0/33)	0 (0/33)	0 (0/29)	0.22 (6/34)	0 (0/55)	0 (0/43)	0 (0/35)	3.6957e-22	0	1	upstream_gene_variant	Sobic.004G196101	MODIFIER	nitrate reductase
Chr04_54717264_54717982_DEL	0.85 (11/25)	0 (0/31)	0 (0/28)	0 (0/29)	0.15 (2/33)	0 (0/53)	0 (0/47)	0 (0/34)	1.99298e-17	0	1	downstream_gene_variant	Sobic.004G196200	MODIFIER	cytochrome P450
Chr04_56103793_56110056_DEL	0.88 (22/29)	0 (0/40)	0 (0/33)	0 (0/31)	0.04 (1/36)	0 (0/53)	0 (0/47)	0.08 (2/31)	7.75815e-35	0	1	transcript_ablation	Sobic.004G211301	HIGH
Chr04_56790815_56791837_DEL	0 (0/36)	0 (0/36)	0 (0/34)	1 (16/29)	0 (0/32)	0 (0/52)	0 (0/43)	0 (0/34)	1.49e-28	0	4	downstream_gene_variant	Sobic.004G218500	MODIFIER	expressed protein
Chr04_56795638_56795719_DEL	0.95 (19/33)	0 (0/44)	0 (0/36)	0 (0/25)	0.05 (1/38)	0 (0/55)	0 (0/51)	0 (0/38)	2.90411e-30	0	1	downstream_gene_variant	Sobic.004G218500	MODIFIER	expressed protein
Chr04_57124648_57124723_DEL	0.89 (16/37)	0 (0/42)	0.11 (2/35)	0 (0/21)	0 (0/30)	0 (0/42)	0 (0/51)	0 (0/36)	4.76017e-18	0	1	intron_variant	Sobic.004G220900	MODIFIER	ethylene-insensitive protein 2
Chr04_57622067_57622775_DEL	0.94 (30/35)	0 (0/30)	0 (0/29)	0 (0/29)	0.06 (2/36)	0 (0/51)	0 (0/40)	0 (0/30)	2.16714e-38	0	1	downstream_gene_variant	Sobic.004G226100	MODIFIER	RIPER1 - Ripening-related family protein precursor
Chr04_57717740_57717816_DEL	0 (0/33)	0.03 (1/40)	0.06 (2/32)	0 (0/26)	0.03 (1/31)	0.06 (2/47)	0.81 (26/37)	0 (0/36)	3.26233e-25	0	7	downstream_gene_variant	Sobic.004G227500	MODIFIER	WD-40 repeat family protein
Chr04_58481852_58481964_DEL	0.09 (2/42)	0 (0/43)	0 (0/32)	0 (0/27)	0.14 (3/32)	0 (0/48)	0.77 (17/36)	0 (0/36)	7.43886e-17	0	7
Chr04_5860054_5860232_DEL	0 (0/36)	0 (0/39)	0.1 (3/33)	0 (0/28)	0.14 (4/35)	0.03 (1/46)	0.72 (21/42)	0 (0/36)	1.05733e-15	0	7	3_prime_UTR_variant	Sobic.004G072600	MODIFIER
Chr04_60079741_60093200_DEL	0.87 (33/36)	0 (0/30)	0 (0/30)	0 (0/28)	0.11 (4/34)	0 (0/53)	0 (0/44)	0.03 (1/32)	1.88608e-38	0	1	intergenic_region	Sobic.004G254400-Sobic.004G254500	MODIFIER
Chr04_60353954_60354029_DEL	0 (0/40)	0 (0/40)	0.09 (2/31)	0 (0/25)	0.05 (1/37)	0.05 (1/54)	0.82 (18/48)	0 (0/37)	8.16868e-14	0	7	intron_variant	Sobic.004G257700	MODIFIER	aspartic proteinase nepenthesin-1 precursor
Chr04_60684266_60684325_DEL	0.9 (19/24)	0 (0/39)	0 (0/31)	0 (0/26)	0.1 (2/32)	0 (0/46)	0 (0/48)	0 (0/34)	1.07519e-35	0	1	intron_variant	Sobic.004G261700	MODIFIER	ARID/BRIGHT DNA-binding domain-containing protein
Chr04_60872679_60872732_DEL	0 (0/38)	0 (0/39)	0.06 (1/35)	0 (0/22)	0 (0/31)	0.06 (1/43)	0.88 (15/44)	0 (0/30)	2.72195e-12	0	7	downstream_gene_variant	Sobic.004G263900	MODIFIER	RNA-binding motif protein
Chr04_61731306_61731386_DEL	0 (0/35)	0 (0/42)	0 (0/32)	0 (0/22)	0.25 (4/35)	0 (0/47)	0 (0/50)	0.75 (12/30)	1.21265e-14	0	8	upstream_gene_variant	Sobic.004G273600	MODIFIER	RNA recognition motif containing protein
Chr04_62398357_62402611_DEL	0.78 (29/33)	0 (0/39)	0 (0/35)	0 (0/29)	0.16 (6/37)	0 (0/56)	0 (0/49)	0.05 (2/37)	2.24839e-37	0	1	upstream_gene_variant	Sobic.004G281600	MODIFIER	uncharacterized mscS family protein
Chr04_62838320_62838915_DEL	0 (0/33)	0 (0/41)	0.11 (4/29)	0 (0/27)	0 (0/34)	0 (0/43)	0.86 (32/44)	0.03 (1/35)	1.44247e-28	0	7	upstream_gene_variant	Sobic.004G285800	MODIFIER	transmembrane amino acid transporter protein
Chr04_63434525_63447903_DEL	0.73 (22/30)	0 (0/32)	0.1 (3/25)	0 (0/28)	0.17 (5/33)	0 (0/53)	0 (0/44)	0 (0/34)	5.10229e-25	0	1	downstream_gene_variant	Sobic.004G294300	MODIFIER	expansin precursor
Chr04_63488948_63489373_DEL	0 (0/36)	0 (0/29)	0.06 (2/32)	0 (0/28)	0.03 (1/31)	0 (0/50)	0.9 (28/47)	0 (0/25)	7.66192e-23	0	7	upstream_gene_variant	Sobic.004G294900	MODIFIER	expressed protein
Chr04_63804697_63805271_DEL	0.91 (30/34)	0 (0/36)	0 (0/32)	0 (0/27)	0.06 (2/31)	0.03 (1/52)	0 (0/38)	0 (0/31)	2.51885e-38	0	1	downstream_gene_variant	Sobic.004G298800	MODIFIER
Chr04_63805111_63805447_DEL	0.73 (24/33)	0 (0/35)	0.03 (1/32)	0.06 (2/19)	0.12 (4/35)	0.06 (2/44)	0 (0/50)	0 (0/34)	1.89986e-23	0	1	downstream_gene_variant	Sobic.004G298800	MODIFIER
Chr04_63823694_63824319_DEL	0 (0/31)	0 (0/30)	0.13 (6/30)	0 (0/30)	0.09 (4/33)	0.02 (1/52)	0.77 (36/50)	0 (0/31)	3.41717e-23	0	7	downstream_gene_variant	Sobic.004G299000	MODIFIER	expressed protein
Chr04_63824777_63826181_DEL	0 (0/35)	0 (0/32)	0.13 (6/31)	0 (0/30)	0.09 (4/35)	0 (0/52)	0.78 (36/50)	0 (0/32)	2.64025e-25	0	7	downstream_gene_variant	Sobic.004G299000	MODIFIER	expressed protein
Chr04_64162109_64162698_DEL	0 (0/31)	0.04 (1/31)	0.07 (2/31)	0 (0/28)	0.11 (3/32)	0.04 (1/54)	0.74 (20/41)	0 (0/33)	1.88297e-14	0	7	upstream_gene_variant	Sobic.004G302800	MODIFIER	MSP domain containing protein
Chr04_64292764_64293334_DEL	0.86 (18/31)	0 (0/30)	0 (0/30)	0 (0/30)	0.14 (3/33)	0 (0/50)	0 (0/43)	0 (0/31)	4.81167e-23	0	1	upstream_gene_variant	Sobic.004G303700	MODIFIER	OsPLIM2a - LIM domain protein actin-binding protein and transcription factor
Chr04_64543630_64544488_DEL	0.76 (19/28)	0 (0/32)	0 (0/33)	0 (0/27)	0.24 (6/34)	0 (0/50)	0 (0/45)	0 (0/31)	3.4299e-25	0	1	downstream_gene_variant	Sobic.004G307800	MODIFIER	expressed protein
Chr04_65716008_65716159_DEL	0 (0/37)	0 (0/40)	0.07 (1/32)	0 (0/25)	0 (0/37)	0 (0/48)	0.93 (14/44)	0 (0/37)	1.63782e-13	0	7	downstream_gene_variant	Sobic.004G322200	MODIFIER	60S ribosomal protein L35a-3
Chr04_66186786_66187400_DEL	0.88 (14/37)	0 (0/32)	0 (0/25)	0 (0/30)	0.06 (1/33)	0 (0/54)	0 (0/40)	0.06 (1/34)	1.80707e-14	0	1	3_prime_UTR_variant	Sobic.004G327100	MODIFIER	atATG18b
Chr04_67650695_67650846_DEL	0.04 (1/37)	0.74 (20/35)	0.19 (5/31)	0 (0/25)	0.04 (1/36)	0 (0/49)	0 (0/52)	0 (0/36)	9.14383e-21	0	2	downstream_gene_variant	Sobic.004G347000	MODIFIER
Chr04_67869983_67870106_DEL	0 (0/36)	0 (0/40)	0.14 (2/32)	0.86 (12/15)	0 (0/34)	0 (0/45)	0 (0/45)	0 (0/34)	1.08971e-35	0	4	splice_region_variant&downstream_gene_variant	Sobic.004G349900	LOW	expressed protein
Chr04_68181152_68181291_DEL	0.96 (25/33)	0 (0/36)	0 (0/35)	0 (0/21)	0.04 (1/35)	0 (0/47)	0 (0/47)	0 (0/32)	5.37499e-36	0	1	5_prime_UTR_variant	Sobic.004G353800	MODIFIER	expressed protein
Chr04_68273478_68273718_DEL	0 (0/35)	0 (0/38)	0.07 (1/31)	0.93 (13/22)	0 (0/30)	0 (0/43)	0 (0/50)	0 (0/31)	4.43747e-27	0	4	upstream_gene_variant	Sobic.004G355401	MODIFIER
Chr04_795707_795835_DEL	0 (0/36)	0 (0/41)	0.06 (1/29)	0.06 (1/25)	0.75 (12/30)	0 (0/44)	0 (0/52)	0.12 (2/34)	1.57885e-13	0	5	upstream_gene_variant	Sobic.004G009300	MODIFIER	expressed protein
Chr04_8636024_8636157_DEL	0 (0/41)	0 (0/39)	0.86 (12/27)	0.07 (1/26)	0.07 (1/34)	0 (0/40)	0 (0/46)	0 (0/34)	5.11376e-18	0	3	upstream_gene_variant	Sobic.004G097300	MODIFIER	phosphoethanolamine/phosphocholine phosphatase
Chr04_9518916_9519585_DEL	0.06 (1/40)	0 (0/39)	0 (0/32)	0 (0/30)	0 (0/38)	0 (0/57)	0 (0/39)	0.94 (16/34)	6.5949e-23	0	8	downstream_gene_variant	Sobic.004G102301	MODIFIER	auxin response factor
Chr04_9591564_9599415_DEL	0 (0/31)	0 (0/32)	0 (0/34)	0 (0/30)	0.15 (3/31)	0 (0/53)	0 (0/44)	0.85 (17/38)	8.43433e-18	0	8	upstream_gene_variant	Sobic.004G102500	MODIFIER	BES1/BZR1 homolog protein
Chr04_9601004_9606810_DEL	0 (0/40)	0 (0/38)	0 (0/32)	0 (0/29)	0.15 (3/36)	0 (0/55)	0 (0/39)	0.85 (17/36)	5.5358e-20	0	8	downstream_gene_variant	Sobic.004G102600	MODIFIER
Chr04_9635893_9637615_DEL	0.04 (1/30)	0.08 (2/33)	0 (0/32)	0 (0/28)	0.12 (3/35)	0 (0/49)	0 (0/43)	0.77 (20/37)	2.95585e-18	0	8	upstream_gene_variant	Sobic.004G102700	MODIFIER	BES1/BZR1 homolog protein
Chr04_994842_995452_DEL	0.7 (39/40)	0.02 (1/29)	0 (0/28)	0 (0/28)	0.16 (9/34)	0.04 (2/49)	0 (0/39)	0.09 (5/31)	6.05425e-29	0	1	downstream_gene_variant	Sobic.004G012100	MODIFIER	basic helix-loop-helix DND-binding domain containing protein
Chr05_10552830_10553596_DEL	0.03 (1/38)	0 (0/34)	0 (0/32)	0 (0/31)	0.12 (4/37)	0 (0/54)	0.03 (1/43)	0.82 (28/35)	1.8833e-33	0	8	upstream_gene_variant	Sobic.005G080050	MODIFIER	expressed protein
Chr05_10652743_10654215_DEL	0.06 (1/32)	0 (0/37)	0 (0/30)	0 (0/30)	0.82 (14/31)	0 (0/53)	0.12 (2/38)	0 (0/30)	1.38263e-16	0	5	exon_loss_variant&splice_donor_variant&splice_region_variant&intron_variant	Sobic.005G081000	HIGH	pentatricopeptide
Chr05_11562387_11562936_DEL	0 (0/36)	0 (0/31)	0.05 (1/30)	0 (0/30)	0.05 (1/36)	0.05 (1/54)	0.86 (19/37)	0 (0/34)	4.29694e-20	0	7	exon_loss_variant	Sobic.005G084800	HIGH	expressed protein
Chr05_1210423_1210814_DEL	0 (0/37)	0.11 (2/41)	0.06 (1/34)	0 (0/24)	0 (0/37)	0.72 (13/46)	0.06 (1/48)	0.06 (1/34)	7.30872e-08	0	6	downstream_gene_variant	Sobic.005G013400	MODIFIER	WRKY52
Chr05_12451006_12452571_DEL	0 (0/33)	0 (0/30)	0.23 (11/29)	0 (0/30)	0.02 (1/32)	0 (0/51)	0.73 (35/47)	0.02 (1/32)	3.4155e-25	0	7	downstream_gene_variant	Sobic.005G087732	MODIFIER
Chr05_12504224_12504605_DEL	0.07 (1/34)	0 (0/39)	0 (0/31)	0 (0/27)	0 (0/37)	0 (0/47)	0.07 (1/44)	0.86 (12/37)	1.96393e-12	0	8	upstream_gene_variant	Sobic.005G087900	MODIFIER	non-lysosomal glucosylceramidase
Chr05_14287301_14287759_DEL	0.08 (2/39)	0 (0/41)	0 (0/34)	0 (0/31)	0.17 (4/36)	0 (0/55)	0.75 (18/43)	0 (0/33)	8.3543e-15	0	7	upstream_gene_variant	Sobic.005G092700	MODIFIER	expressed protein
Chr05_15059235_15059637_DEL	0.73 (22/33)	0.03 (1/40)	0.03 (1/31)	0 (0/31)	0.2 (6/26)	0 (0/55)	0 (0/44)	0 (0/32)	2.94237e-24	0	1
Chr05_15765975_15766038_DEL	0 (0/41)	0.75 (15/38)	0.05 (1/33)	0 (0/26)	0 (0/36)	0.2 (4/45)	0 (0/51)	0 (0/36)	7.12291e-14	0	2	upstream_gene_variant	Sobic.005G097800	MODIFIER	eukaryotic aspartyl protease domain containing protein
Chr05_16269403_16276510_DEL	0 (0/33)	0 (0/32)	0.07 (1/28)	0.79 (11/30)	0.14 (2/32)	0 (0/52)	0 (0/40)	0 (0/32)	1.79509e-12	0	4	upstream_gene_variant	Sobic.005G099550	MODIFIER	retrotransposon protein, unclassified
Chr05_16744436_16744591_DEL	0 (0/34)	0 (0/39)	0.05 (1/29)	0 (0/23)	0 (0/35)	0 (0/43)	0.95 (20/39)	0 (0/37)	5.95038e-22	0	7	intergenic_region	Sobic.005G100400-Sobic.005G100500	MODIFIER
Chr05_18974115_18992523_DEL	0 (0/33)	0 (0/31)	0.16 (7/30)	0 (0/29)	0 (0/28)	0 (0/52)	0.84 (38/49)	0 (0/31)	3.03511e-29	0	7	intergenic_region	Sobic.005G104800-Sobic.005G104850	MODIFIER
Chr05_19055468_19055918_DEL	0 (0/32)	0 (0/29)	0.14 (6/26)	0 (0/29)	0 (0/31)	0 (0/54)	0.86 (36/49)	0 (0/28)	1.7314e-27	0	7	intergenic_region	Sobic.005G104800-Sobic.005G104850	MODIFIER
Chr05_19097268_19097643_DEL	0 (0/34)	0 (0/36)	0.12 (5/31)	0 (0/29)	0 (0/32)	0 (0/47)	0.88 (36/49)	0 (0/34)	9.01117e-30	0	7	upstream_gene_variant	Sobic.005G105000	MODIFIER	STE_MEKK_ste11_MAP3K.3 - STE kinases include homologs to sterile 7, sterile 11 and sterile 20 from yeast
Chr05_19916204_19916283_DEL	0 (0/40)	0 (0/39)	0.14 (2/29)	0 (0/28)	0 (0/37)	0 (0/49)	0.86 (12/36)	0 (0/36)	3.83092e-13	0	7	downstream_gene_variant	Sobic.005G106000	MODIFIER
Chr05_2090849_2094152_DEL	0 (0/39)	0.11 (4/39)	0.11 (4/35)	0 (0/26)	0 (0/36)	0.05 (2/55)	0.73 (27/50)	0 (0/38)	5.99664e-18	0	7	transcript_ablation	Sobic.005G023201	HIGH
Chr05_2120282_2120810_DEL	0.17 (3/33)	0 (0/33)	0 (0/28)	0 (0/31)	0.06 (1/29)	0 (0/52)	0 (0/39)	0.78 (14/34)	8.51378e-14	0	8	exon_loss_variant	Sobic.005G023600	HIGH	pollen allergen Cyn d 23
Chr05_21431364_21431432_DEL	0.9 (18/29)	0 (0/41)	0 (0/35)	0 (0/25)	0.1 (2/39)	0 (0/53)	0 (0/51)	0 (0/36)	5.32617e-30	0	1	intergenic_region	Sobic.005G109000-Sobic.005G109101	MODIFIER
Chr05_21527228_21539872_DEL	0 (0/34)	0 (0/37)	0.04 (1/28)	0 (0/27)	0 (0/34)	0.08 (2/52)	0.88 (23/33)	0 (0/35)	1.14957e-28	0	7	intergenic_region	Sobic.005G109000-Sobic.005G109101	MODIFIER
Chr05_22333597_22339194_DEL	0 (0/32)	0 (0/34)	0.08 (3/31)	0 (0/27)	0 (0/33)	0.06 (2/54)	0.86 (31/40)	0 (0/32)	2.54037e-30	0	7	intergenic_region	Sobic.005G109201-Sobic.005G109300	MODIFIER
Chr05_23137605_23137772_DEL	0 (0/40)	0 (0/39)	0.13 (4/29)	0 (0/26)	0 (0/34)	0.06 (2/49)	0.81 (25/41)	0 (0/30)	4.08991e-22	0	7	intergenic_region	Sobic.005G109600-Sobic.005G109800	MODIFIER
Chr05_2330102_2330187_DEL	0.88 (28/34)	0 (0/41)	0 (0/35)	0 (0/26)	0.06 (2/32)	0 (0/42)	0 (0/47)	0.06 (2/36)	1.03818e-35	0	1	intron_variant	Sobic.005G026000	MODIFIER	expressed protein
Chr05_24688000_24688072_DEL	0 (0/40)	0 (0/40)	0.09 (3/31)	0 (0/24)	0 (0/34)	0.06 (2/42)	0.86 (30/41)	0 (0/35)	9.87436e-29	0	7	5_prime_UTR_variant	Sobic.005G110200	MODIFIER
Chr05_25078872_25081665_DEL	0 (0/35)	0 (0/35)	0.08 (3/32)	0 (0/29)	0 (0/32)	0.05 (2/55)	0.87 (34/45)	0 (0/34)	4.44571e-31	0	7	intergenic_region	Sobic.005G110400-Sobic.005G110403	MODIFIER
Chr05_25698412_25698960_DEL	0 (0/38)	0 (0/38)	0.12 (4/33)	0 (0/25)	0 (0/35)	0.06 (2/51)	0.82 (27/39)	0 (0/33)	1.79577e-26	0	7	intergenic_region	Sobic.005G110415-Sobic.005G110418	MODIFIER
Chr05_26456642_26457218_DEL	0 (0/33)	0 (0/32)	0.1 (4/31)	0 (0/30)	0 (0/33)	0.05 (2/54)	0.85 (35/44)	0 (0/34)	2.1858e-31	0	7	intergenic_region	Sobic.005G110433-Sobic.005G110436	MODIFIER
Chr05_27307929_27308038_DEL	0 (0/39)	0 (0/43)	0.11 (3/31)	0 (0/28)	0 (0/37)	0 (0/47)	0.89 (25/37)	0 (0/35)	5.18427e-30	0	7	intergenic_region	Sobic.005G110457-Sobic.005G110460	MODIFIER
Chr05_28371765_28371829_DEL	0.9 (19/30)	0 (0/42)	0 (0/32)	0 (0/24)	0.1 (2/32)	0 (0/45)	0 (0/48)	0 (0/36)	2.40231e-28	0	1	intergenic_region	Sobic.005G110469-Sobic.005G110472	MODIFIER
Chr05_2949058_2949125_DEL	0 (0/38)	0 (0/39)	0.21 (9/27)	0 (0/25)	0 (0/34)	0.05 (2/43)	0.7 (30/38)	0.05 (2/37)	1.72013e-25	0	7	intron_variant	Sobic.005G033100	MODIFIER	acyl-CoA synthetase protein
Chr05_2957718_2957827_DEL	0 (0/37)	0 (0/42)	0.14 (5/30)	0 (0/27)	0 (0/35)	0.08 (3/46)	0.76 (28/35)	0.03 (1/35)	4.65023e-28	0	7	upstream_gene_variant	Sobic.005G033200	MODIFIER	expressed protein
Chr05_30162053_30162425_DEL	0.86 (24/32)	0 (0/37)	0 (0/26)	0 (0/30)	0.11 (3/36)	0 (0/51)	0 (0/44)	0.04 (1/32)	3.15273e-31	0	1	intergenic_region	Sobic.005G110478-Sobic.005G110481	MODIFIER
Chr05_30671675_30673631_DEL	0 (0/35)	0 (0/34)	0.09 (3/29)	0 (0/29)	0 (0/30)	0.06 (2/56)	0.85 (28/38)	0 (0/33)	1.15228e-28	0	7	intergenic_region	Sobic.005G110484-Sobic.005G110487	MODIFIER
Chr05_30675733_30676248_DEL	0.85 (22/31)	0 (0/33)	0 (0/31)	0 (0/30)	0.12 (3/37)	0 (0/52)	0 (0/45)	0.04 (1/30)	3.01153e-29	0	1	intergenic_region	Sobic.005G110484-Sobic.005G110487	MODIFIER
Chr05_31308365_31327044_DEL	0 (0/33)	0 (0/32)	0.11 (4/29)	0 (0/30)	0 (0/32)	0.06 (2/55)	0.83 (30/38)	0 (0/32)	6.64077e-30	0	7	intergenic_region	Sobic.005G110493-Sobic.005G110496	MODIFIER
Chr05_31525981_31539875_DEL	0.89 (25/36)	0 (0/31)	0 (0/30)	0 (0/28)	0.07 (2/34)	0 (0/51)	0 (0/43)	0.04 (1/32)	3.63805e-29	0	1	intergenic_region	Sobic.005G110493-Sobic.005G110496	MODIFIER
Chr05_3174813_3175442_DEL	0.81 (13/35)	0 (0/36)	0 (0/29)	0 (0/23)	0.12 (2/38)	0 (0/52)	0 (0/43)	0.06 (1/37)	1.54135e-13	0	1	upstream_gene_variant	Sobic.005G035300	MODIFIER	phytosulfokines precursor
Chr05_3252148_3252257_DEL	0.86 (19/34)	0 (0/43)	0 (0/34)	0 (0/23)	0.09 (2/35)	0 (0/53)	0 (0/48)	0.05 (1/35)	2.43953e-24	0	1	upstream_gene_variant	Sobic.005G035800	MODIFIER	zinc finger, C3HC4 type domain containing protein
Chr05_3252839_3253321_DEL	0.92 (23/37)	0 (0/36)	0 (0/29)	0 (0/30)	0.04 (1/39)	0 (0/57)	0 (0/42)	0.04 (1/37)	2.2531e-29	0	1	upstream_gene_variant	Sobic.005G035800	MODIFIER	zinc finger, C3HC4 type domain containing protein
Chr05_3255340_3256586_DEL	0.7 (21/34)	0 (0/35)	0.03 (1/30)	0.13 (4/24)	0.07 (2/32)	0 (0/54)	0.03 (1/42)	0.03 (1/32)	7.89007e-19	0	1	upstream_gene_variant	Sobic.005G035800	MODIFIER	zinc finger, C3HC4 type domain containing protein
Chr05_3294642_3294776_DEL	0.88 (22/29)	0 (0/41)	0 (0/32)	0 (0/25)	0.08 (2/35)	0 (0/48)	0 (0/46)	0.04 (1/36)	1.15753e-33	0	1	upstream_gene_variant	Sobic.005G036300	MODIFIER	ligA
Chr05_33634648_33638053_DEL	0 (0/36)	0 (0/38)	0.08 (3/33)	0.03 (1/30)	0 (0/32)	0.05 (2/56)	0.84 (32/42)	0 (0/32)	1.50434e-30	0	7	upstream_gene_variant	Sobic.005G110502	MODIFIER	helix-loop-helix DNA-binding domain containing protein
Chr05_3371597_3372732_DEL	0.88 (38/38)	0 (0/31)	0 (0/30)	0 (0/28)	0.09 (4/33)	0.02 (1/55)	0 (0/46)	0 (0/32)	9.03024e-44	0	1	downstream_gene_variant	Sobic.005G036900	MODIFIER	RCLEA9 - Root cap and Late embryogenesis related family protein precursor
Chr05_34361835_34361910_DEL	0 (0/36)	0.87 (13/38)	0 (0/33)	0 (0/25)	0.07 (1/29)	0.07 (1/43)	0 (0/48)	0 (0/36)	7.3543e-13	0	2	intron_variant	Sobic.005G110544	MODIFIER	expressed protein
Chr05_35189916_35192049_DEL	0 (0/39)	0 (0/38)	0.05 (2/32)	0 (0/30)	0 (0/36)	0.05 (2/54)	0.9 (35/45)	0 (0/34)	6.38627e-35	0	7	intergenic_region	Sobic.005G110700-Sobic.005G110800	MODIFIER
Chr05_35341783_35341866_DEL	0 (0/36)	0 (0/38)	0.1 (3/30)	0 (0/29)	0 (0/37)	0.07 (2/42)	0.83 (25/35)	0 (0/38)	9.86278e-28	0	7	intergenic_region	Sobic.005G110800-Sobic.005G110900	MODIFIER
Chr05_35657709_35657807_DEL	0.86 (19/30)	0 (0/43)	0 (0/36)	0 (0/27)	0.14 (3/36)	0 (0/53)	0 (0/50)	0 (0/38)	1.06923e-29	0	1	intergenic_region	Sobic.005G111000-Sobic.005G111100	MODIFIER
Chr05_3573376_3574936_DEL	0 (0/33)	0 (0/39)	0.17 (7/33)	0 (0/27)	0 (0/39)	0.05 (2/50)	0.7 (28/37)	0.07 (3/37)	7.60084e-25	0	7	upstream_gene_variant	Sobic.005G039100	MODIFIER	expressed protein
Chr05_37014631_37014746_DEL	0.83 (19/30)	0 (0/42)	0 (0/31)	0 (0/23)	0.13 (3/37)	0 (0/42)	0 (0/50)	0.04 (1/35)	2.23156e-25	0	1	intergenic_region	Sobic.005G111800-Sobic.005G111900	MODIFIER
Chr05_37245133_37245200_DEL	0.86 (12/22)	0 (0/39)	0 (0/31)	0 (0/26)	0.07 (1/32)	0 (0/44)	0 (0/51)	0.07 (1/36)	1.52692e-22	0	1	intergenic_region	Sobic.005G111800-Sobic.005G111900	MODIFIER
Chr05_39159286_39159388_DEL	0.96 (23/34)	0 (0/44)	0 (0/36)	0 (0/30)	0.04 (1/36)	0 (0/49)	0 (0/52)	0 (0/38)	4.16493e-36	0	1	intergenic_region	Sobic.005G112700-Sobic.005G112800	MODIFIER
Chr05_41226034_41226543_DEL	0 (0/32)	0.77 (10/36)	0.15 (2/32)	0 (0/27)	0 (0/31)	0.08 (1/52)	0 (0/44)	0 (0/31)	8.94361e-09	0	2	intergenic_region	Sobic.005G113101-Sobic.005G113300	MODIFIER
Chr05_41435405_41438450_DEL	0 (0/31)	0.77 (10/37)	0.15 (2/30)	0 (0/27)	0 (0/31)	0.08 (1/51)	0 (0/41)	0 (0/33)	2.56756e-08	0	2	intron_variant	Sobic.005G113766	MODIFIER	expressed protein
Chr05_42011179_42029535_DEL	0.9 (26/32)	0 (0/35)	0 (0/29)	0 (0/30)	0.07 (2/35)	0 (0/55)	0 (0/44)	0.03 (1/34)	7.7762e-37	0	1	intergenic_region	Sobic.005G114101-Sobic.005G114201	MODIFIER
Chr05_42427563_42430008_DEL	0.86 (25/32)	0 (0/36)	0 (0/28)	0 (0/28)	0.1 (3/33)	0 (0/52)	0 (0/44)	0.03 (1/30)	3.47474e-32	0	1	intergenic_region	Sobic.005G114101-Sobic.005G114201	MODIFIER
Chr05_43562647_43562740_DEL	0 (0/39)	0 (0/40)	0.04 (1/33)	0 (0/26)	0 (0/37)	0.04 (1/45)	0.93 (26/43)	0 (0/36)	4.11487e-27	0	7	intergenic_region	Sobic.005G114500-Sobic.005G114600	MODIFIER
Chr05_43974367_43974724_DEL	0 (0/31)	0 (0/39)	0.07 (3/31)	0 (0/23)	0 (0/36)	0.05 (2/51)	0.88 (36/53)	0 (0/31)	1.62165e-26	0	7	intergenic_region	Sobic.005G114600-Sobic.005G114700	MODIFIER
Chr05_44893935_44894007_DEL	0 (0/38)	0 (0/35)	0.07 (2/34)	0 (0/25)	0 (0/36)	0.07 (2/44)	0.85 (23/33)	0 (0/36)	1.93231e-27	0	7	intergenic_region	Sobic.005G114900-Sobic.005G115000	MODIFIER
Chr05_4496515_4497198_DEL	0 (0/34)	0 (0/39)	0.09 (2/29)	0 (0/26)	0.09 (2/33)	0.04 (1/45)	0.78 (18/51)	0 (0/32)	1.27836e-10	0	7	conservative_inframe_deletion	Sobic.005G047500	MODERATE	expressed protein
Chr05_45097344_45106748_DEL	0.87 (26/32)	0 (0/35)	0 (0/31)	0 (0/30)	0.1 (3/37)	0 (0/53)	0 (0/43)	0.03 (1/31)	4.45618e-35	0	1	downstream_gene_variant	Sobic.005G115000	MODIFIER	yippee zinc-binding protein
Chr05_45110451_45127856_DEL	0.85 (23/30)	0 (0/33)	0 (0/29)	0 (0/31)	0.11 (3/34)	0 (0/54)	0 (0/44)	0.04 (1/34)	2.99645e-32	0	1	intergenic_region	Sobic.005G115000-Sobic.005G115200	MODIFIER
Chr05_497544_499124_DEL	0 (0/33)	0 (0/31)	0 (0/30)	0.93 (14/28)	0.07 (1/36)	0 (0/53)	0 (0/42)	0 (0/31)	1.94233e-22	0	4	upstream_gene_variant	Sobic.005G006300	MODIFIER	TMS membrane protein/tumour differentially expressed protein
Chr05_4980497_4982405_DEL	0 (0/29)	0 (0/34)	0.03 (1/27)	0 (0/30)	0.23 (7/34)	0 (0/49)	0.74 (23/46)	0 (0/37)	2.25024e-16	0	7	intergenic_region	Sobic.005G051300-Sobic.005G051500	MODIFIER
Chr05_50627416_50639841_DEL	0 (0/34)	0.12 (7/31)	0.05 (3/26)	0.02 (1/30)	0.02 (1/33)	0.07 (4/55)	0.71 (40/47)	0 (0/33)	3.11751e-25	0	7	splice_region_variant	Sobic.005G115600	LOW	6-phosphogluconate dehydrogenase, decarboxylating
Chr05_5103547_5103657_DEL	0 (0/37)	0 (0/43)	0.1 (2/33)	0 (0/27)	0.05 (1/37)	0 (0/55)	0.86 (18/47)	0 (0/37)	1.33384e-15	0	7	intergenic_region	Sobic.005G051800-Sobic.005G052000	MODIFIER
Chr05_52059514_52133456_DEL	0.05 (2/32)	0 (0/35)	0.1 (4/26)	0 (0/29)	0.02 (1/31)	0.05 (2/54)	0.76 (31/43)	0.02 (1/30)	2.37868e-22	0	7	intergenic_region	Sobic.005G119300-Sobic.005G119700	MODIFIER
Chr05_52608733_52608848_DEL	0.05 (1/39)	0 (0/42)	0 (0/31)	0 (0/26)	0.14 (3/33)	0 (0/42)	0 (0/50)	0.82 (18/26)	3.37394e-28	0	8	upstream_gene_variant	Sobic.005G120600	MODIFIER	OsSPL19 - SBP-box gene family member
Chr05_52647776_52647887_DEL	0.05 (1/41)	0 (0/44)	0 (0/34)	0 (0/27)	0.14 (3/36)	0 (0/52)	0 (0/50)	0.82 (18/27)	1.95096e-29	0	8	intergenic_region	Sobic.005G120600-Sobic.005G120700	MODIFIER
Chr05_52668885_52669052_DEL	0.04 (1/37)	0 (0/42)	0 (0/28)	0 (0/25)	0.19 (5/35)	0 (0/46)	0.04 (1/51)	0.73 (19/29)	1.94505e-23	0	8	intergenic_region	Sobic.005G120600-Sobic.005G120700	MODIFIER
Chr05_52915207_52915341_DEL	0.04 (1/40)	0 (0/44)	0 (0/34)	0 (0/25)	0.14 (4/35)	0 (0/51)	0.04 (1/50)	0.79 (22/31)	3.31913e-29	0	8	intron_variant	Sobic.005G120700	MODIFIER	ThiF family domain containing protein
Chr05_52918082_52918789_DEL	0.03 (1/34)	0 (0/36)	0 (0/29)	0 (0/28)	0.16 (6/37)	0 (0/46)	0.03 (1/38)	0.79 (30/39)	7.15997e-28	0	8	splice_region_variant	Sobic.005G120700	LOW	ThiF family domain containing protein
Chr05_52926497_52936217_DEL	0.05 (1/41)	0 (0/40)	0 (0/35)	0 (0/31)	0.18 (4/37)	0 (0/55)	0 (0/51)	0.77 (17/26)	6.63374e-28	0	8	intergenic_region	Sobic.005G120700-Sobic.005G120800	MODIFIER
Chr05_52926497_52936519_DEL	0.04 (1/39)	0 (0/36)	0 (0/33)	0 (0/30)	0.12 (3/34)	0 (0/56)	0 (0/45)	0.84 (21/31)	1.94985e-29	0	8	intergenic_region	Sobic.005G120700-Sobic.005G120800	MODIFIER
Chr05_52988497_52988641_DEL	0 (0/37)	0 (0/43)	0 (0/31)	0 (0/28)	0.21 (4/37)	0 (0/54)	0.05 (1/51)	0.74 (14/23)	8.50481e-24	0	8	downstream_gene_variant	Sobic.005G120800	MODIFIER	expressed protein
Chr05_54108820_54108899_DEL	0 (0/36)	0 (0/42)	0.07 (2/27)	0 (0/29)	0 (0/37)	0.07 (2/51)	0.86 (24/39)	0 (0/35)	4.87741e-25	0	7	intergenic_region	Sobic.005G123700-Sobic.005G123900	MODIFIER
Chr05_54735908_54741024_DEL	0 (0/31)	0 (0/31)	0.16 (9/30)	0 (0/28)	0.05 (3/31)	0.04 (2/53)	0.75 (41/50)	0 (0/29)	1.02631e-25	0	7	intergenic_region	Sobic.005G125100-Sobic.005G125200	MODIFIER
Chr05_54786867_54793598_DEL	0 (0/34)	0 (0/28)	0.16 (8/28)	0 (0/30)	0 (0/33)	0.04 (2/53)	0.8 (40/49)	0 (0/29)	6.97423e-29	0	7	intergenic_region	Sobic.005G125400-Sobic.005G125600	MODIFIER
Chr05_55093370_55093717_DEL	0 (0/38)	0 (0/34)	0.06 (1/30)	0 (0/26)	0.06 (1/34)	0 (0/50)	0.89 (16/42)	0 (0/35)	9.15493e-15	0	7	intergenic_region	Sobic.005G126401-Sobic.005G126501	MODIFIER
Chr05_55773749_55776377_DEL	0 (0/38)	0 (0/38)	0.2 (8/34)	0 (0/29)	0 (0/35)	0.05 (2/53)	0.76 (31/53)	0 (0/31)	4.72788e-21	0	7	intergenic_region	Sobic.005G128550-Sobic.005G128700	MODIFIER
Chr05_57087947_57089347_DEL	0 (0/34)	0 (0/34)	0 (0/30)	0 (0/29)	0.08 (1/33)	0.15 (2/53)	0.77 (10/41)	0 (0/30)	3.99498e-07	0	7	intergenic_region	Sobic.005G130700-Sobic.005G130800	MODIFIER
Chr05_57395956_57417833_DEL	0.05 (1/32)	0 (0/30)	0 (0/31)	0 (0/30)	0.18 (4/34)	0 (0/51)	0.05 (1/41)	0.73 (16/35)	1.99223e-14	0	8	transcript_ablation	Sobic.005G132033	HIGH	retrotransposon protein, unclassified
Chr05_59551419_59559995_DEL	0.78 (31/38)	0 (0/39)	0.03 (1/32)	0 (0/31)	0.17 (7/33)	0 (0/56)	0.03 (1/50)	0 (0/37)	9.87304e-34	0	1	downstream_gene_variant	Sobic.005G140200	MODIFIER	dehydrogenase
Chr05_61826177_61826809_DEL	0.81 (22/38)	0 (0/33)	0 (0/29)	0 (0/27)	0.11 (3/32)	0 (0/55)	0.07 (2/40)	0 (0/38)	8.94741e-22	0	1	intergenic_region	Sobic.005G149600-Sobic.005G149650	MODIFIER
Chr05_63706691_63706790_DEL	0.76 (13/33)	0 (0/42)	0.06 (1/33)	0 (0/24)	0 (0/31)	0.18 (3/46)	0 (0/50)	0 (0/37)	8.55803e-14	0	1	upstream_gene_variant	Sobic.005G161900	MODIFIER	cytochrome P450
Chr05_64710809_64721006_DEL	0 (0/34)	0.86 (12/32)	0.07 (1/29)	0 (0/29)	0.07 (1/31)	0 (0/50)	0 (0/44)	0 (0/29)	6.52674e-14	0	2	intergenic_region	Sobic.005G168400-Sobic.005G168500	MODIFIER
Chr05_65575147_65575258_DEL	0.74 (23/35)	0.16 (5/35)	0 (0/29)	0 (0/22)	0.1 (3/25)	0 (0/48)	0 (0/51)	0 (0/36)	5.89451e-22	0	1	intergenic_region	Sobic.005G175150-Sobic.005G175200	MODIFIER
Chr05_65924184_65924306_DEL	0.89 (16/27)	0 (0/42)	0 (0/36)	0 (0/23)	0.06 (1/36)	0 (0/52)	0 (0/49)	0.06 (1/36)	2.48828e-27	0	1	upstream_gene_variant	Sobic.005G177200	MODIFIER	expressed protein
Chr05_66456199_66456274_DEL	0.86 (19/29)	0 (0/40)	0 (0/32)	0 (0/24)	0.09 (2/33)	0 (0/41)	0 (0/47)	0.05 (1/34)	1.12668e-26	0	1	upstream_gene_variant	Sobic.005G181900	MODIFIER	MBTB64 - Bric-a-Brac, Tramtrack, Broad Complex BTB domain with Meprin and TRAF Homology MATH domain
Chr05_6654455_6657408_DEL	0.84 (26/31)	0 (0/34)	0 (0/32)	0 (0/29)	0.1 (3/33)	0 (0/52)	0 (0/44)	0.06 (2/32)	2.73107e-34	0	1	upstream_gene_variant	Sobic.005G061200	MODIFIER	dirigent
Chr05_6654956_6667290_DEL	0.86 (32/37)	0 (0/34)	0 (0/29)	0 (0/29)	0.08 (3/33)	0 (0/54)	0 (0/44)	0.05 (2/33)	1.49251e-36	0	1	upstream_gene_variant	Sobic.005G061200	MODIFIER	dirigent
Chr05_67140572_67140637_DEL	0.86 (19/33)	0 (0/40)	0 (0/30)	0 (0/26)	0.14 (3/35)	0 (0/46)	0 (0/51)	0 (0/35)	1.20645e-24	0	1	downstream_gene_variant	Sobic.005G186800	MODIFIER	OsSCP1 - Putative Serine Carboxypeptidase homologue
Chr05_67142273_67142370_DEL	0.77 (17/32)	0 (0/36)	0 (0/33)	0 (0/22)	0.18 (4/37)	0 (0/48)	0 (0/49)	0.05 (1/33)	2.41183e-19	0	1	downstream_gene_variant	Sobic.005G186800	MODIFIER	OsSCP1 - Putative Serine Carboxypeptidase homologue
Chr05_675596_675663_DEL	0.93 (14/34)	0 (0/42)	0 (0/35)	0 (0/17)	0.07 (1/32)	0 (0/46)	0 (0/49)	0 (0/37)	3.02859e-18	0	1	upstream_gene_variant	Sobic.005G008800	MODIFIER	WD domain and HEAT domain containing protein
Chr05_68088507_68103495_DEL	0 (0/33)	0 (0/32)	0.71 (12/33)	0 (0/29)	0.06 (1/29)	0.24 (4/50)	0 (0/41)	0 (0/32)	1.23719e-10	0	3	upstream_gene_variant	Sobic.005G195800	MODIFIER	RNA recognition motif containing protein
Chr05_68740736_68741327_DEL	0 (0/37)	0 (0/39)	0.17 (8/33)	0 (0/22)	0 (0/31)	0.09 (4/40)	0.74 (34/51)	0 (0/36)	5.42025e-21	0	7
Chr05_68989777_68990363_DEL	0 (0/38)	0 (0/37)	0.21 (3/33)	0 (0/29)	0.07 (1/32)	0 (0/52)	0 (0/46)	0.71 (10/37)	8.06403e-09	0	8
Chr05_6930899_6931280_DEL	0 (0/35)	0.07 (2/38)	0.03 (1/28)	0 (0/30)	0.07 (2/29)	0.03 (1/54)	0.8 (24/50)	0 (0/36)	2.93197e-16	0	7	intergenic_region	Sobic.005G063300-Sobic.005G063400	MODIFIER
Chr05_7132546_7133666_DEL	0.82 (18/28)	0 (0/33)	0 (0/30)	0 (0/29)	0.14 (3/37)	0.05 (1/50)	0 (0/40)	0 (0/33)	1.21882e-24	0	1	frameshift_variant&start_lost	Sobic.005G064500	HIGH
Chr05_7132814_7133356_DEL	0.74 (20/30)	0 (0/39)	0 (0/28)	0.04 (1/26)	0.11 (3/34)	0.04 (1/47)	0.07 (2/43)	0 (0/32)	8.04595e-22	0	1
Chr05_71464207_71472401_DEL	0 (0/35)	0.15 (5/30)	0.7 (23/33)	0 (0/29)	0.12 (4/32)	0.03 (1/56)	0 (0/45)	0 (0/32)	5.22035e-23	0	3	upstream_gene_variant	Sobic.005G227300	MODIFIER	zinc finger, C3HC4 type domain containing protein
Chr05_71547640_71550497_DEL	0 (0/31)	0.18 (4/30)	0.73 (16/33)	0 (0/29)	0.05 (1/33)	0.05 (1/54)	0 (0/36)	0 (0/32)	2.80648e-15	0	3	downstream_gene_variant	Sobic.005G228100	MODIFIER	expressed protein
Chr05_71717002_71717165_DEL	0 (0/37)	0 (0/40)	0 (0/31)	1 (14/20)	0 (0/34)	0 (0/42)	0 (0/40)	0 (0/35)	1.03528e-35	0	4	downstream_gene_variant	Sobic.005G230700	MODIFIER	SCARECROW
Chr05_7989125_7990379_DEL	0 (0/33)	0.05 (1/35)	0 (0/29)	0.91 (20/25)	0 (0/31)	0 (0/51)	0.05 (1/43)	0 (0/32)	9.09485e-36	0	4	upstream_gene_variant	Sobic.005G068900	MODIFIER	OsWAK92 - OsWAK receptor-like protein kinase
Chr05_974539_979230_DEL	0.77 (17/33)	0 (0/31)	0 (0/27)	0 (0/29)	0.18 (4/31)	0.05 (1/55)	0 (0/41)	0 (0/31)	9.51742e-18	0	1	upstream_gene_variant	Sobic.005G011000	MODIFIER	Rf1, mitochondrial precursor
Chr06_1035562_1041984_DEL	0 (0/41)	0 (0/40)	0.03 (1/33)	0.87 (26/29)	0.1 (3/40)	0 (0/57)	0 (0/48)	0 (0/35)	1.06886e-44	0	4	upstream_gene_variant	Sobic.006G006700	MODIFIER
Chr06_1042936_1043027_DEL	0 (0/35)	0 (0/41)	0.12 (2/32)	0.76 (13/16)	0.12 (2/33)	0 (0/42)	0 (0/46)	0 (0/33)	3.61345e-31	0	4	downstream_gene_variant	Sobic.006G006700	MODIFIER
Chr06_14485583_14487163_DEL	0.88 (28/37)	0 (0/32)	0.03 (1/27)	0 (0/29)	0.06 (2/32)	0 (0/51)	0 (0/38)	0.03 (1/32)	6.58428e-30	0	1	downstream_gene_variant	Sobic.006G037700	MODIFIER	phosphoribulokinase/Uridine kinase family protein
Chr06_1619584_1639691_DEL	0 (0/41)	0 (0/31)	0 (0/30)	0 (0/30)	0.06 (2/33)	0 (0/52)	0.94 (29/45)	0 (0/32)	1.43195e-28	0	7
Chr06_1647990_1648455_DEL	0.7 (23/32)	0 (0/33)	0.06 (2/25)	0 (0/30)	0.18 (6/34)	0.03 (1/50)	0.03 (1/44)	0 (0/31)	2.62574e-22	0	1	downstream_gene_variant	Sobic.006G011350	MODIFIER	inhibitor I family protein
Chr06_16726267_16726398_DEL	0.94 (16/27)	0 (0/42)	0 (0/34)	0 (0/26)	0.06 (1/32)	0 (0/39)	0 (0/50)	0 (0/35)	1.53736e-27	0	1	downstream_gene_variant	Sobic.006G039100	MODIFIER	RALFL36 - Rapid ALkalinization Factor RALF family protein precursor
Chr06_1770399_1779598_DEL	0 (0/37)	0.03 (1/36)	0.15 (6/31)	0.05 (2/31)	0.03 (1/37)	0 (0/54)	0.75 (30/47)	0 (0/35)	2.19473e-22	0	7	downstream_gene_variant	Sobic.006G012100	MODIFIER	expressed protein
Chr06_1866418_1866963_DEL	0 (0/33)	0 (0/31)	0.1 (2/32)	0.8 (16/31)	0.1 (2/32)	0 (0/56)	0 (0/43)	0 (0/31)	2.661e-19	0	4	upstream_gene_variant	Sobic.006G012800	MODIFIER	acyl-coenzyme A dehydrogenase, mitochondrial precursor
Chr06_1958335_1958481_DEL	0.85 (23/28)	0 (0/41)	0 (0/32)	0 (0/23)	0.15 (4/25)	0 (0/47)	0 (0/50)	0 (0/33)	2.39321e-34	0	1	upstream_gene_variant	Sobic.006G014100	MODIFIER	serine-rich 25 kDa antigen protein
Chr06_26162583_26172337_DEL	0.9 (28/37)	0 (0/30)	0 (0/27)	0 (0/29)	0.06 (2/31)	0 (0/52)	0 (0/42)	0.03 (1/31)	1.83338e-31	0	1	intergenic_region	Sobic.006G040800-Sobic.006G040900	MODIFIER
Chr06_3047844_3047932_DEL	0.78 (14/34)	0.06 (1/40)	0.11 (2/33)	0 (0/26)	0.06 (1/34)	0 (0/52)	0 (0/39)	0 (0/36)	2.17649e-14	0	1	downstream_gene_variant	Sobic.006G018200	MODIFIER	oxidoreductase, aldo/keto reductase family protein
Chr06_30812305_30812402_DEL	0.91 (21/33)	0 (0/40)	0 (0/36)	0 (0/28)	0.04 (1/35)	0 (0/46)	0 (0/49)	0.04 (1/35)	8.54896e-30	0	1	intron_variant	Sobic.006G044301	MODIFIER
Chr06_32758131_32766099_DEL	0.9 (26/36)	0 (0/34)	0 (0/30)	0 (0/21)	0.07 (2/35)	0 (0/50)	0 (0/41)	0.03 (1/32)	9.26104e-30	0	1	upstream_gene_variant	Sobic.006G047200	MODIFIER	helix-loop-helix DNA-binding domain containing protein
Chr06_3288808_3290969_DEL	0.97 (37/39)	0 (0/36)	0 (0/30)	0 (0/31)	0.03 (1/35)	0 (0/53)	0 (0/45)	0 (0/34)	1.31295e-48	0	1	intergenic_region	Sobic.006G019100-Sobic.006G019200	MODIFIER
Chr06_35166292_35166367_DEL	0.89 (17/28)	0 (0/43)	0 (0/35)	0 (0/26)	0.05 (1/35)	0 (0/54)	0 (0/50)	0.05 (1/36)	7.67435e-29	0	1	intergenic_region	Sobic.006G048775-Sobic.006G048850	MODIFIER
Chr06_3975181_3976143_DEL	0 (0/34)	0.05 (1/36)	0.25 (5/34)	0.7 (14/30)	0 (0/31)	0 (0/49)	0 (0/37)	0 (0/32)	2.99728e-15	0	4	upstream_gene_variant	Sobic.006G022900	MODIFIER	cytochrome P450
Chr06_41373287_41398434_DEL	0.82 (28/36)	0.03 (1/30)	0.03 (1/30)	0 (0/31)	0.12 (4/31)	0 (0/52)	0 (0/38)	0 (0/33)	2.75261e-29	0	1	upstream_gene_variant	Sobic.006G061100	MODIFIER	CBS domain containing membrane protein
Chr06_41398871_41406707_DEL	0.73 (24/33)	0.06 (2/32)	0.06 (2/25)	0 (0/27)	0.15 (5/34)	0 (0/54)	0 (0/42)	0 (0/31)	2.16267e-23	0	1	intergenic_region	Sobic.006G061100-Sobic.006G061201	MODIFIER
Chr06_41416918_41417287_DEL	0.95 (19/31)	0 (0/36)	0 (0/29)	0 (0/24)	0.05 (1/34)	0 (0/50)	0 (0/45)	0 (0/32)	7.27548e-28	0	1	intergenic_region	Sobic.006G061100-Sobic.006G061201	MODIFIER
Chr06_4199629_4221873_DEL	0 (0/33)	0 (0/33)	0.07 (1/30)	0 (0/30)	0.07 (1/35)	0 (0/52)	0.86 (12/42)	0 (0/32)	4.63671e-10	0	7	downstream_gene_variant	Sobic.006G024500	MODIFIER	CBS domain containing membrane protein
Chr06_42765230_42768191_DEL	0.85 (11/32)	0 (0/31)	0 (0/29)	0 (0/30)	0.08 (1/31)	0 (0/52)	0 (0/39)	0.08 (1/36)	1.67099e-12	0	1	upstream_gene_variant	Sobic.006G067200	MODIFIER
Chr06_43397289_43398452_DEL	0.86 (18/36)	0 (0/39)	0 (0/34)	0 (0/30)	0.1 (2/35)	0 (0/55)	0 (0/41)	0.05 (1/34)	4.78091e-21	0	1	intergenic_region	Sobic.006G072000-Sobic.006G072201	MODIFIER
Chr06_44794469_44794611_DEL	0 (0/40)	0.07 (1/34)	0 (0/31)	0.14 (2/27)	0 (0/39)	0.07 (1/47)	0.71 (10/45)	0 (0/37)	3.1938e-06	0	7	intergenic_region	Sobic.006G079650-Sobic.006G079800	MODIFIER
Chr06_44909511_44909627_DEL	0.71 (17/28)	0 (0/43)	0 (0/33)	0 (0/25)	0.25 (6/31)	0.04 (1/46)	0 (0/48)	0 (0/35)	1.05128e-21	0	1	downstream_gene_variant	Sobic.006G080400	MODIFIER	ubiquitin carboxyl-terminal hydrolase domain containing protein
Chr06_44910088_44910672_DEL	0.79 (30/38)	0 (0/30)	0 (0/30)	0 (0/30)	0.21 (8/33)	0 (0/52)	0 (0/44)	0 (0/33)	1.0519e-30	0	1	downstream_gene_variant	Sobic.006G080500	MODIFIER	helix-loop-helix DNA-binding domain containing protein
Chr06_45058782_45058873_DEL	0.91 (20/29)	0 (0/39)	0 (0/33)	0 (0/28)	0.09 (2/35)	0 (0/44)	0 (0/50)	0 (0/37)	3.64625e-32	0	1	upstream_gene_variant	Sobic.006G082000	MODIFIER	OsSub41 - Putative Subtilisin homologue
Chr06_46184830_46185395_DEL	0.75 (27/35)	0 (0/37)	0 (0/32)	0 (0/29)	0.14 (5/35)	0 (0/56)	0 (0/46)	0.11 (4/35)	3.36388e-29	0	1	upstream_gene_variant	Sobic.006G091600	MODIFIER	12-oxophytodienoate reductase
Chr06_47080605_47081517_DEL	0.83 (19/40)	0 (0/36)	0 (0/33)	0 (0/29)	0.13 (3/34)	0 (0/56)	0 (0/42)	0.04 (1/34)	9.92929e-19	0	1	gene_fusion	Sobic.006G100332&Sobic.006G100400	HIGH	expressed protein& expressed protein
Chr06_47082750_47083555_DEL	0.86 (19/37)	0 (0/36)	0 (0/34)	0 (0/28)	0.09 (2/34)	0 (0/51)	0 (0/46)	0.05 (1/31)	3.99821e-21	0	1	downstream_gene_variant	Sobic.006G100332	MODIFIER	expressed protein
Chr06_472438_472839_DEL	0.82 (27/37)	0 (0/34)	0.03 (1/31)	0 (0/29)	0.15 (5/32)	0 (0/52)	0 (0/39)	0 (0/30)	9.10256e-28	0	1	intron_variant	Sobic.006G002800	MODIFIER	zinc finger C-x8-C-x5-C-x3-H type family protein
Chr06_47400904_47401576_DEL	0.07 (1/33)	0 (0/34)	0 (0/27)	0 (0/30)	0 (0/31)	0 (0/49)	0 (0/38)	0.93 (14/37)	2.00943e-15	0	8	upstream_gene_variant	Sobic.006G104100	MODIFIER	oxidoreductase, short chain dehydrogenase/reductase family domain containing protein
Chr06_47433781_47433855_DEL	0 (0/42)	0.14 (6/37)	0.07 (3/33)	0.02 (1/24)	0 (0/37)	0.7 (30/40)	0.05 (2/48)	0.02 (1/34)	4.8208e-23	0	6	intergenic_region	Sobic.006G104500-Sobic.006G104600	MODIFIER
Chr06_475244_475323_DEL	0.79 (19/28)	0 (0/41)	0.04 (1/30)	0 (0/25)	0.17 (4/33)	0 (0/40)	0 (0/48)	0 (0/33)	3.2913e-25	0	1	intron_variant	Sobic.006G002800	MODIFIER	zinc finger C-x8-C-x5-C-x3-H type family protein
Chr06_47794360_47794732_DEL	0 (0/34)	0 (0/40)	0.06 (1/29)	0 (0/26)	0 (0/31)	0.72 (13/51)	0.11 (2/42)	0.11 (2/30)	2.73393e-06	0	6	upstream_gene_variant	Sobic.006G108500	MODIFIER	dynein light chain type 1 domain containing protein
Chr06_47873216_47874747_DEL	0.08 (2/21)	0 (0/39)	0 (0/30)	0 (0/30)	0.12 (3/34)	0 (0/54)	0 (0/44)	0.79 (19/30)	2.05783e-23	0	8	upstream_gene_variant	Sobic.006G109700	MODIFIER	UBA and UBX domain-containing protein
Chr06_48115581_48115706_DEL	0.09 (2/41)	0 (0/43)	0 (0/34)	0 (0/23)	0.17 (4/35)	0 (0/54)	0.04 (1/47)	0.7 (16/27)	9.47923e-21	0	8	upstream_gene_variant	Sobic.006G113000	MODIFIER	expressed protein
Chr06_48232377_48232620_DEL	0.73 (16/33)	0 (0/33)	0 (0/29)	0 (0/29)	0.27 (6/31)	0 (0/50)	0 (0/43)	0 (0/30)	8.87681e-17	0	1	upstream_gene_variant	Sobic.006G114500	MODIFIER	per1-like family protein
Chr06_48543736_48544168_DEL	0.96 (22/33)	0 (0/34)	0 (0/32)	0 (0/27)	0.04 (1/32)	0 (0/55)	0 (0/40)	0 (0/37)	1.04118e-31	0	1	upstream_gene_variant	Sobic.006G117700	MODIFIER
Chr06_48717991_48718156_DEL	0 (0/39)	0.04 (1/39)	0.16 (4/27)	0 (0/26)	0 (0/33)	0 (0/49)	0.8 (20/46)	0 (0/38)	9.65399e-16	0	7	upstream_gene_variant	Sobic.006G120500	MODIFIER	glycosyl transferase family 17 protein
Chr06_49500764_49501165_DEL	0.9 (19/31)	0 (0/32)	0 (0/31)	0 (0/29)	0.1 (2/34)	0 (0/53)	0 (0/43)	0 (0/30)	1.68256e-26	0	1	splice_region_variant	Sobic.006G130750	LOW	expressed protein
Chr06_49514735_49518716_DEL	0.88 (28/36)	0 (0/30)	0 (0/27)	0 (0/29)	0.12 (4/32)	0 (0/54)	0 (0/41)	0 (0/30)	1.08613e-31	0	1	upstream_gene_variant	Sobic.006G130900	MODIFIER
Chr06_50677998_50678479_DEL	0.08 (2/42)	0 (0/43)	0 (0/36)	0 (0/28)	0.08 (2/37)	0 (0/52)	0 (0/49)	0.85 (22/36)	9.17404e-28	0	8
Chr06_50976044_50976176_DEL	0 (0/43)	0 (0/42)	0.2 (5/29)	0 (0/26)	0 (0/37)	0.04 (1/51)	0.72 (18/43)	0.04 (1/37)	2.17689e-14	0	7	intron_variant	Sobic.006G148100	MODIFIER	DUF647 domain containing protein
Chr06_51534092_51534183_DEL	0 (0/35)	0.82 (18/40)	0.09 (2/33)	0 (0/25)	0 (0/30)	0.09 (2/52)	0 (0/46)	0 (0/38)	8.55861e-17	0	2	intergenic_region	Sobic.006G156100-Sobic.006G156200	MODIFIER
Chr06_52123420_52124617_DEL	0.82 (28/32)	0 (0/33)	0 (0/29)	0 (0/30)	0.15 (5/30)	0 (0/55)	0.03 (1/39)	0 (0/31)	3.4399e-34	0	1	intergenic_region	Sobic.006G163501-Sobic.006G163600	MODIFIER
Chr06_52125106_52125476_DEL	0.81 (30/38)	0 (0/37)	0 (0/33)	0 (0/28)	0.16 (6/35)	0 (0/52)	0.03 (1/46)	0 (0/30)	7.93587e-32	0	1	intergenic_region	Sobic.006G163501-Sobic.006G163600	MODIFIER
Chr06_54160179_54160785_DEL	0 (0/33)	0 (0/33)	0 (0/33)	0 (0/29)	0.15 (3/35)	0 (0/51)	0 (0/43)	0.85 (17/35)	1.38753e-19	0	8	downstream_gene_variant	Sobic.006G186400	MODIFIER	ZOS4-12 - C2H2 zinc finger protein
Chr06_54231586_54232108_DEL	0 (0/33)	0.81 (17/38)	0.14 (3/32)	0.05 (1/29)	0 (0/29)	0 (0/54)	0 (0/48)	0 (0/28)	2.22079e-16	0	2	upstream_gene_variant	Sobic.006G187800	MODIFIER	expressed protein
Chr06_54754977_54755052_DEL	0.09 (2/37)	0 (0/43)	0 (0/29)	0 (0/24)	0.14 (3/30)	0 (0/43)	0 (0/51)	0.77 (17/24)	2.14143e-26	0	8	5_prime_UTR_variant	Sobic.006G194300	MODIFIER	DUF581 domain containing protein
Chr06_55006947_55007381_DEL	0.76 (28/34)	0 (0/26)	0 (0/28)	0 (0/30)	0.22 (8/35)	0 (0/50)	0.03 (1/43)	0 (0/32)	3.7458e-29	0	1	intron_variant	Sobic.006G197500	MODIFIER	helix-loop-helix DNA-binding protein
Chr06_55193198_55193343_DEL	0.04 (1/38)	0 (0/41)	0 (0/35)	0 (0/18)	0.07 (2/33)	0.04 (1/43)	0.11 (3/47)	0.74 (20/27)	3.03024e-25	0	8	frameshift_variant	Sobic.006G200400	HIGH	expressed protein
Chr06_55668348_55670305_DEL	0.22 (4/40)	0 (0/39)	0 (0/30)	0 (0/28)	0.72 (13/36)	0 (0/44)	0 (0/50)	0.06 (1/35)	3.82618e-12	0	5	upstream_gene_variant	Sobic.006G207000	MODIFIER	expressed protein
Chr06_56278438_56278853_DEL	0.74 (31/39)	0 (0/29)	0 (0/28)	0 (0/31)	0.1 (4/31)	0.1 (4/53)	0.05 (2/42)	0.02 (1/27)	1.22724e-24	0	1	upstream_gene_variant	Sobic.006G214400	MODIFIER	peptidase, trypsin-like serine and cysteine proteases
Chr06_57662187_57663377_DEL	0.73 (36/38)	0 (0/30)	0 (0/28)	0 (0/29)	0.24 (12/36)	0 (0/53)	0 (0/40)	0.02 (1/29)	1.35079e-33	0	1	upstream_gene_variant	Sobic.006G234900	MODIFIER
Chr06_57880203_57880913_DEL	0.84 (37/38)	0 (0/33)	0 (0/27)	0 (0/30)	0.16 (7/33)	0 (0/53)	0 (0/39)	0 (0/32)	1.89654e-39	0	1	downstream_gene_variant	Sobic.006G237500	MODIFIER	PPR repeat domain containing protein
Chr06_58036268_58036365_DEL	0.9 (27/30)	0 (0/39)	0 (0/31)	0 (0/23)	0.1 (3/30)	0 (0/44)	0 (0/48)	0 (0/34)	2.08067e-39	0	1	frameshift_variant	Sobic.006G239900	HIGH	Cf-4A protein
Chr06_58358145_58358212_DEL	0.96 (22/31)	0 (0/41)	0 (0/31)	0 (0/24)	0.04 (1/36)	0 (0/41)	0 (0/50)	0 (0/33)	8.75924e-34	0	1	upstream_gene_variant	Sobic.006G243300	MODIFIER	expressed protein
Chr06_60979035_60980026_DEL	0 (0/31)	0 (0/36)	0 (0/33)	0 (0/29)	0.86 (12/36)	0 (0/50)	0.14 (2/41)	0 (0/33)	1.12506e-12	0	5	intergenic_region	Sobic.006G279400-Sobic.006G279600	MODIFIER
Chr06_6136817_6136917_DEL	0.95 (21/33)	0 (0/41)	0 (0/29)	0 (0/22)	0.05 (1/34)	0 (0/41)	0 (0/49)	0 (0/32)	6.37809e-29	0	1	upstream_gene_variant	Sobic.006G029200	MODIFIER	OsSub52 - Putative Subtilisin homologue
Chr06_6156582_6157081_DEL	0.83 (29/37)	0.03 (1/39)	0 (0/34)	0 (0/28)	0.14 (5/33)	0 (0/50)	0 (0/39)	0 (0/36)	4.95663e-32	0	1	upstream_gene_variant	Sobic.006G029400	MODIFIER	GDSL-like lipase/acylhydrolase
Chr07_10127731_10127892_DEL	0.88 (21/30)	0 (0/42)	0 (0/36)	0 (0/25)	0.12 (3/36)	0 (0/54)	0 (0/52)	0 (0/38)	1.56533e-33	0	1	upstream_gene_variant	Sobic.007G083900	MODIFIER	B3 DNA binding domain containing protein
Chr07_10274276_10274755_DEL	0.81 (26/30)	0 (0/35)	0 (0/28)	0 (0/29)	0.19 (6/39)	0 (0/56)	0 (0/41)	0 (0/37)	2.47842e-36	0	1	upstream_gene_variant	Sobic.007G084300	MODIFIER	kelch repeat protein
Chr07_1031531_1032951_DEL	0.06 (2/36)	0 (0/24)	0 (0/33)	0 (0/19)	0.06 (2/35)	0 (0/50)	0.03 (1/53)	0.85 (28/38)	6.00862e-29	0	8	exon_loss_variant	Sobic.007G011400	HIGH	armadillo/beta-catenin repeat family protein
Chr07_11804377_11804487_DEL	0.94 (15/36)	0 (0/39)	0.06 (1/31)	0 (0/28)	0 (0/34)	0 (0/54)	0 (0/53)	0 (0/37)	4.87175e-20	0	1	upstream_gene_variant	Sobic.007G087300	MODIFIER
Chr07_131051_131394_DEL	0.79 (15/35)	0 (0/37)	0.05 (1/32)	0 (0/26)	0.11 (2/30)	0 (0/52)	0 (0/38)	0.05 (1/29)	3.02771e-14	0	1	upstream_gene_variant	Sobic.007G001500	MODIFIER	nicalin
Chr07_1368255_1368358_DEL	0.86 (12/36)	0 (0/43)	0.14 (2/33)	0 (0/24)	0 (0/36)	0 (0/50)	0 (0/50)	0 (0/37)	5.72836e-14	0	1	downstream_gene_variant	Sobic.007G015600	MODIFIER
Chr07_14064843_14073605_DEL	0 (0/33)	0 (0/32)	0.04 (1/30)	0 (0/29)	0.09 (2/35)	0 (0/52)	0.17 (4/42)	0.7 (16/34)	4.34788e-14	0	8	3_prime_UTR_variant	Sobic.007G090469	MODIFIER	cycloartenol synthase
Chr07_1691966_1692459_DEL	0.1 (3/36)	0 (0/35)	0 (0/31)	0 (0/30)	0.03 (1/34)	0.03 (1/52)	0 (0/43)	0.84 (26/36)	1.72943e-29	0	8	intergenic_region	Sobic.007G018100-Sobic.007G018200	MODIFIER
Chr07_1993384_1993452_DEL	0.77 (10/28)	0 (0/37)	0 (0/33)	0 (0/27)	0.23 (3/31)	0 (0/47)	0 (0/46)	0 (0/34)	8.98862e-13	0	1	downstream_gene_variant	Sobic.007G021100	MODIFIER	carrier
Chr07_2001239_2001896_DEL	0.88 (21/35)	0 (0/30)	0 (0/29)	0 (0/28)	0.12 (3/31)	0 (0/53)	0 (0/43)	0 (0/29)	5.98247e-24	0	1	splice_acceptor_variant&splice_region_variant&5_prime_UTR_variant&intron_variant	Sobic.007G021200	HIGH	carrier
Chr07_20720750_20722368_DEL	0 (0/33)	0.05 (1/34)	0 (0/29)	0 (0/29)	0 (0/32)	0.86 (19/56)	0 (0/40)	0.09 (2/34)	2.37149e-11	0	6	intergenic_region	Sobic.007G098800-Sobic.007G098950	MODIFIER
Chr07_22461639_22493922_DEL	0 (0/32)	0.05 (1/36)	0 (0/29)	0 (0/28)	0 (0/30)	0.86 (18/51)	0 (0/40)	0.1 (2/33)	1.25965e-11	0	6	intergenic_region	Sobic.007G099200-Sobic.007G099400	MODIFIER
Chr07_22525483_22525611_DEL	0 (0/33)	0 (0/38)	0 (0/30)	0 (0/26)	0 (0/30)	0.92 (12/39)	0 (0/50)	0.08 (1/34)	5.52767e-12	1	6	intergenic_region	Sobic.007G099200-Sobic.007G099400	MODIFIER
Chr07_30180337_30192373_DEL	0 (0/36)	0 (0/34)	0 (0/30)	0.79 (11/27)	0.21 (3/30)	0 (0/54)	0 (0/43)	0 (0/34)	1.77068e-15	0	4	intergenic_region	Sobic.007G103350-Sobic.007G103400	MODIFIER
Chr07_3616628_3617082_DEL	0 (0/41)	0.06 (1/42)	0 (0/32)	0 (0/31)	0.19 (3/36)	0 (0/54)	0 (0/46)	0.75 (12/24)	1.61757e-19	0	8	intergenic_region	Sobic.007G037301-Sobic.007G037400	MODIFIER
Chr07_3641758_3641925_DEL	0.88 (14/34)	0 (0/40)	0 (0/30)	0 (0/23)	0.12 (2/30)	0 (0/42)	0 (0/48)	0 (0/33)	4.61018e-16	0	1	downstream_gene_variant	Sobic.007G037400	MODIFIER	expressed protein
Chr07_3701021_3701172_DEL	0.92 (22/26)	0 (0/38)	0 (0/31)	0 (0/27)	0.08 (2/33)	0 (0/49)	0 (0/49)	0 (0/34)	1.11552e-39	0	1	upstream_gene_variant	Sobic.007G038000	MODIFIER	receptor-like protein kinase 5 precursor
Chr07_3757992_3758482_DEL	0 (0/32)	0 (0/33)	0 (0/32)	1 (14/28)	0 (0/32)	0 (0/54)	0 (0/43)	0 (0/32)	1.01677e-24	0	4	upstream_gene_variant	Sobic.007G039001	MODIFIER
Chr07_40038464_40038520_DEL	0 (0/36)	0.07 (1/41)	0 (0/32)	0 (0/23)	0 (0/29)	0.93 (13/41)	0 (0/47)	0 (0/32)	2.12063e-12	0	6	intergenic_region	Sobic.007G110400-Sobic.007G110500	MODIFIER
Chr07_43146976_43149993_DEL	0.05 (1/34)	0 (0/30)	0 (0/29)	0 (0/29)	0.05 (1/33)	0 (0/48)	0.14 (3/40)	0.77 (17/35)	8.42385e-16	0	8	intergenic_region	Sobic.007G112301-Sobic.007G112400	MODIFIER
Chr07_4462241_4463313_DEL	0 (0/30)	1 (13/35)	0 (0/30)	0 (0/31)	0 (0/30)	0 (0/55)	0 (0/40)	0 (0/28)	9.19071e-17	0	2	splice_region_variant	Sobic.007G044100	LOW	retrotransposon protein, unclassified
Chr07_4489405_4489811_DEL	0 (0/32)	0.18 (3/34)	0.06 (1/31)	0.76 (13/30)	0 (0/33)	0 (0/49)	0 (0/42)	0 (0/31)	7.2265e-15	0	4	upstream_gene_variant	Sobic.007G044300	MODIFIER	peptide transporter PTR2
Chr07_48155747_48155802_DEL	0 (0/34)	0.07 (1/41)	0 (0/32)	0 (0/20)	0 (0/37)	0.86 (12/42)	0 (0/47)	0.07 (1/32)	6.17624e-10	0	6	intergenic_region	Sobic.007G114100-Sobic.007G114200	MODIFIER
Chr07_5138114_5139177_DEL	0 (0/35)	0 (0/34)	0 (0/30)	1 (15/24)	0 (0/33)	0 (0/50)	0 (0/51)	0 (0/34)	1.14401e-32	0	4	downstream_gene_variant	Sobic.007G050600	MODIFIER	CSLF6 - cellulose synthase-like family F; beta1,3;1,4 glucan synthase
Chr07_52891071_52892369_DEL	0.95 (19/27)	0 (0/32)	0 (0/29)	0 (0/30)	0.05 (1/39)	0 (0/55)	0 (0/40)	0 (0/26)	1.58379e-32	0	1	intergenic_region	Sobic.007G123350-Sobic.007G123400	MODIFIER
Chr07_52913433_52914365_DEL	0.81 (21/36)	0 (0/34)	0 (0/30)	0.04 (1/28)	0.15 (4/36)	0 (0/55)	0 (0/46)	0 (0/31)	1.28089e-22	0	1	downstream_gene_variant	Sobic.007G123400	MODIFIER	heavy metal-associated domain containing protein
Chr07_53207757_53210094_DEL	0.92 (23/33)	0 (0/31)	0 (0/30)	0 (0/27)	0.08 (2/36)	0 (0/50)	0 (0/42)	0 (0/35)	7.07814e-31	0	1	upstream_gene_variant	Sobic.007G124200	MODIFIER	uncharacterized glycosyl hydrolase Rv2006/MT2062
Chr07_54567099_54567248_DEL	0.7 (19/23)	0 (0/41)	0.04 (1/36)	0.04 (1/21)	0.11 (3/32)	0 (0/46)	0 (0/52)	0.11 (3/38)	1.45879e-28	0	1	upstream_gene_variant	Sobic.007G129201	MODIFIER	expressed protein
Chr07_55751325_55751562_DEL	0.97 (33/41)	0 (0/36)	0 (0/32)	0 (0/19)	0.03 (1/33)	0 (0/43)	0 (0/48)	0 (0/30)	8.04335e-37	0	1	5_prime_UTR_variant	Sobic.007G133766	MODIFIER	cytochrome P450
Chr07_56279224_56281700_DEL	0.04 (1/32)	0 (0/31)	0 (0/28)	0 (0/29)	0.78 (21/36)	0 (0/51)	0.15 (4/40)	0.04 (1/31)	1.68407e-19	0	5	downstream_gene_variant	Sobic.007G136200	MODIFIER	expressed protein
Chr07_56347917_56362127_DEL	0.04 (1/32)	0 (0/38)	0 (0/28)	0 (0/31)	0.74 (17/33)	0 (0/46)	0.17 (4/41)	0.04 (1/33)	1.28803e-16	0	5	intergenic_region	Sobic.007G136200-Sobic.007G136300	MODIFIER
Chr07_56399173_56399299_DEL	0 (0/37)	0 (0/42)	0.21 (3/32)	0 (0/24)	0 (0/36)	0.79 (11/41)	0 (0/46)	0 (0/37)	2.23416e-09	0	6	upstream_gene_variant	Sobic.007G136600	MODIFIER	SET domain-containing protein
Chr07_56451304_56452057_DEL	0 (0/39)	0 (0/30)	0.14 (2/31)	0 (0/29)	0.79 (11/33)	0 (0/49)	0 (0/42)	0.07 (1/38)	1.22486e-11	0	5	downstream_gene_variant	Sobic.007G137000	MODIFIER	lipoate protein ligase
Chr07_5690237_5702646_DEL	0 (0/33)	0 (0/31)	0.06 (1/32)	0 (0/30)	0.75 (12/32)	0 (0/54)	0.19 (3/43)	0 (0/32)	2.31575e-12	0	5	intergenic_region	Sobic.007G055600-Sobic.007G055700	MODIFIER
Chr07_57148356_57150725_DEL	0.74 (17/35)	0 (0/33)	0.13 (3/31)	0 (0/30)	0.13 (3/37)	0 (0/55)	0 (0/45)	0 (0/33)	6.75552e-17	0	1	upstream_gene_variant	Sobic.007G141801	MODIFIER
Chr07_57818391_57818951_DEL	0.9 (19/26)	0 (0/37)	0 (0/29)	0 (0/31)	0.1 (2/36)	0 (0/53)	0 (0/39)	0 (0/35)	3.03596e-33	0	1	downstream_gene_variant	Sobic.007G147700	MODIFIER	OsSAUR33 - Auxin-responsive SAUR gene family member
Chr07_57986771_57987151_DEL	0.86 (32/40)	0 (0/29)	0 (0/29)	0.05 (2/30)	0.08 (3/34)	0 (0/52)	0 (0/37)	0 (0/28)	5.10935e-31	0	1	upstream_gene_variant	Sobic.007G149000	MODIFIER	cytochrome P450
Chr07_58846090_58846674_DEL	0.7 (14/35)	0 (0/34)	0 (0/33)	0 (0/23)	0.25 (5/34)	0 (0/43)	0.05 (1/42)	0 (0/36)	2.32244e-12	0	1	exon_loss_variant	Sobic.007G154901	HIGH	bifunctional monodehydroascorbate reductase and carbonic anhydrasenectarin-3 precursor
Chr07_59176634_59177379_DEL	1 (15/34)	0 (0/35)	0 (0/31)	0 (0/30)	0 (0/34)	0 (0/51)	0 (0/42)	0 (0/33)	2.25124e-21	0	1	upstream_gene_variant	Sobic.007G157500	MODIFIER	gibberellin receptor GID1L2
Chr07_59342897_59349877_DEL	0 (0/34)	0 (0/33)	0.05 (1/32)	0 (0/29)	0.05 (1/34)	0.79 (15/53)	0.11 (2/43)	0 (0/37)	1.98189e-08	0	6	downstream_gene_variant	Sobic.007G158800	MODIFIER	patatin
Chr07_59567041_59568122_DEL	0.89 (39/42)	0 (0/33)	0 (0/28)	0 (0/28)	0.11 (5/32)	0 (0/51)	0 (0/36)	0 (0/33)	2.19227e-38	0	1	downstream_gene_variant	Sobic.007G160900	MODIFIER	peptide transporter PTR2
Chr07_59639026_59639126_DEL	0.76 (25/29)	0 (0/43)	0.12 (4/31)	0 (0/24)	0.06 (2/32)	0 (0/51)	0.03 (1/50)	0.03 (1/33)	3.63421e-32	0	1	upstream_gene_variant	Sobic.007G162100	MODIFIER	TENA/THI-4 family protein
Chr07_61107995_61108429_DEL	0.12 (2/33)	0 (0/32)	0 (0/32)	0 (0/27)	0.06 (1/32)	0 (0/50)	0 (0/41)	0.82 (14/36)	8.28834e-14	0	8	downstream_gene_variant	Sobic.007G177300	MODIFIER	kinetochore protein
Chr07_61142839_61143466_DEL	0.13 (2/34)	0 (0/34)	0 (0/32)	0 (0/30)	0.13 (2/33)	0 (0/54)	0 (0/43)	0.73 (11/29)	1.48396e-12	0	8	5_prime_UTR_variant	Sobic.007G178100	MODIFIER	zinc finger, C3HC4 type family protein
Chr07_61421164_61421268_DEL	0.11 (3/40)	0 (0/41)	0 (0/34)	0 (0/28)	0.18 (5/32)	0 (0/48)	0 (0/51)	0.71 (20/32)	9.26313e-23	0	8	upstream_gene_variant	Sobic.007G181000	MODIFIER	serpin domain containing protein
Chr07_62251028_62251545_DEL	0 (0/32)	0.03 (1/31)	0.03 (1/30)	0.03 (1/27)	0.13 (4/35)	0 (0/49)	0.77 (23/42)	0 (0/32)	5.02827e-17	0	7	upstream_gene_variant	Sobic.007G189700	MODIFIER
Chr07_6226197_6226710_DEL	0 (0/33)	0 (0/37)	0.09 (2/27)	0.77 (17/29)	0.09 (2/34)	0 (0/52)	0 (0/38)	0.05 (1/36)	4.77573e-21	0	4	intergenic_region	Sobic.007G059500-Sobic.007G059600	MODIFIER
Chr07_63083248_63083634_DEL	0.12 (4/37)	0 (0/37)	0 (0/31)	0 (0/25)	0.12 (4/35)	0 (0/52)	0 (0/45)	0.76 (25/34)	5.42931e-27	0	8	3_prime_UTR_variant	Sobic.007G200000	MODIFIER	expressed protein
Chr07_64129237_64131107_DEL	0.88 (14/36)	0 (0/28)	0 (0/30)	0 (0/28)	0.12 (2/32)	0 (0/54)	0 (0/38)	0 (0/33)	8.15037e-15	0	1	upstream_gene_variant	Sobic.007G212500	MODIFIER	nodulation protein-related
Chr07_64772589_64773246_DEL	0.73 (27/36)	0 (0/29)	0 (0/30)	0 (0/31)	0.24 (9/32)	0 (0/51)	0 (0/39)	0.03 (1/31)	5.59074e-26	0	1	downstream_gene_variant	Sobic.007G219601	MODIFIER	expressed protein
Chr07_65094166_65096659_DEL	0 (0/38)	0.08 (2/42)	0.04 (1/31)	0 (0/30)	0.04 (1/37)	0.72 (18/57)	0.12 (3/45)	0 (0/39)	5.69659e-09	0	6	upstream_gene_variant	Sobic.007G223400	MODIFIER	ZOS2-06 - C2H2 zinc finger protein
Chr07_7124199_7124302_DEL	0.96 (24/27)	0 (0/42)	0 (0/34)	0 (0/22)	0.04 (1/31)	0 (0/43)	0 (0/49)	0 (0/36)	2.01722e-43	0	1	intergenic_region	Sobic.007G066200-Sobic.007G066566	MODIFIER
Chr07_9099341_9099965_DEL	0.89 (33/35)	0 (0/34)	0 (0/31)	0 (0/29)	0.08 (3/33)	0 (0/50)	0 (0/46)	0.03 (1/34)	5.52814e-42	0	1	intergenic_region	Sobic.007G077832-Sobic.007G077900	MODIFIER
Chr07_9190121_9190227_DEL	0.9 (27/31)	0 (0/43)	0 (0/34)	0 (0/27)	0.1 (3/39)	0 (0/51)	0 (0/53)	0 (0/35)	1.97221e-43	0	1	upstream_gene_variant	Sobic.007G078500	MODIFIER	serine/threonine-protein kinase HT1
Chr08_10552799_10553173_DEL	0.85 (11/35)	0 (0/33)	0 (0/27)	0 (0/28)	0.08 (1/34)	0 (0/51)	0 (0/41)	0.08 (1/32)	3.72285e-11	0	1	intron_variant	Sobic.008G073900	MODIFIER	OsSCP65 - Putative Serine Carboxypeptidase homologue
Chr08_13892848_13894057_DEL	0.86 (25/38)	0 (0/33)	0 (0/32)	0 (0/29)	0.14 (4/36)	0 (0/51)	0 (0/36)	0 (0/37)	3.01424e-27	0	1	intergenic_region	Sobic.008G080500-Sobic.008G080600	MODIFIER
Chr08_20239026_20248979_DEL	0 (0/30)	0 (0/31)	0 (0/27)	1 (16/30)	0 (0/35)	0 (0/50)	0 (0/39)	0 (0/39)	9.77307e-26	0	4	intergenic_region	Sobic.008G088818-Sobic.008G088821	MODIFIER
Chr08_29803510_29810756_DEL	0 (0/36)	0 (0/35)	0 (0/29)	0 (0/30)	0.09 (2/36)	0 (0/54)	0 (0/46)	0.91 (20/33)	6.54017e-28	0	8	upstream_gene_variant	Sobic.008G088890	MODIFIER	retrotransposon protein, unclassified
Chr08_3249074_3251118_DEL	0.27 (4/35)	0 (0/36)	0 (0/33)	0 (0/29)	0 (0/31)	0 (0/56)	0 (0/43)	0.73 (11/34)	1.88109e-11	0	8	upstream_gene_variant	Sobic.008G035300	MODIFIER	ligA
Chr08_3908849_3911371_DEL	0.9 (26/34)	0 (0/40)	0 (0/30)	0 (0/21)	0.1 (3/35)	0 (0/49)	0 (0/49)	0 (0/35)	2.85226e-34	0	1	exon_loss_variant	Sobic.008G040600	HIGH	bZIP transcription factor domain containing protein
Chr08_40566378_40566436_DEL	0 (0/35)	0.12 (3/33)	0.04 (1/30)	0 (0/25)	0.08 (2/33)	0.73 (19/42)	0.04 (1/50)	0 (0/32)	7.76701e-13	0	6	intergenic_region	Sobic.008G092532-Sobic.008G092600	MODIFIER
Chr08_42245227_42245345_DEL	0 (0/39)	0.16 (6/38)	0.03 (1/33)	0 (0/26)	0.08 (3/34)	0.74 (28/50)	0 (0/48)	0 (0/35)	4.63084e-18	0	6	intergenic_region	Sobic.008G092932-Sobic.008G093000	MODIFIER
Chr08_4374131_4374273_DEL	0.83 (19/29)	0 (0/36)	0 (0/33)	0 (0/23)	0.13 (3/35)	0 (0/40)	0.04 (1/48)	0 (0/34)	4.23297e-25	0	1	downstream_gene_variant	Sobic.008G044400	MODIFIER	expressed protein
Chr08_4652174_4652981_DEL	0.9 (19/35)	0 (0/28)	0 (0/32)	0 (0/29)	0.1 (2/35)	0 (0/49)	0 (0/41)	0 (0/29)	3.14339e-22	0	1	upstream_gene_variant	Sobic.008G047200	MODIFIER
Chr08_47586720_47587302_DEL	0.89 (25/40)	0 (0/42)	0 (0/34)	0 (0/31)	0.11 (3/37)	0 (0/56)	0 (0/49)	0 (0/38)	1.17594e-30	0	1	splice_donor_variant&splice_region_variant&3_prime_UTR_variant&intron_variant	Sobic.008G100400	HIGH	pentatricopeptide, putative, expressed
Chr08_47592280_47592857_DEL	0.93 (25/40)	0 (0/36)	0 (0/32)	0 (0/29)	0.07 (2/33)	0 (0/56)	0 (0/44)	0 (0/29)	1.44436e-28	0	1	upstream_gene_variant	Sobic.008G100400	MODIFIER	tetratricopeptide-like helical
Chr08_47592332_47592676_DEL	1 (17/33)	0 (0/41)	0 (0/31)	0 (0/26)	0 (0/35)	0 (0/53)	0 (0/47)	0 (0/36)	1.01029e-26	0	1	upstream_gene_variant	Sobic.008G100400	MODIFIER	tetratricopeptide-like helical
Chr08_47664165_47684417_DEL	0.94 (17/35)	0 (0/39)	0 (0/29)	0 (0/31)	0.06 (1/30)	0 (0/55)	0 (0/37)	0 (0/35)	5.13573e-22	0	1	downstream_gene_variant	Sobic.008G100600	MODIFIER	pattern formation protein EMB30
Chr08_48247450_48247825_DEL	0.77 (23/37)	0 (0/35)	0 (0/27)	0 (0/30)	0.23 (7/31)	0 (0/51)	0 (0/41)	0 (0/30)	1.09626e-22	0	1	conservative_inframe_deletion	Sobic.008G101400	MODERATE
Chr08_4841020_4843378_DEL	0.77 (30/36)	0 (0/32)	0.03 (1/28)	0 (0/31)	0.21 (8/34)	0 (0/54)	0 (0/45)	0 (0/33)	6.70068e-32	0	1	downstream_gene_variant	Sobic.008G049100	MODIFIER	nucleolar protein family 6
Chr08_4856322_4861241_DEL	0.72 (33/35)	0 (0/31)	0 (0/28)	0 (0/28)	0.26 (12/36)	0 (0/51)	0.02 (1/40)	0 (0/30)	1.01215e-32	0	1	upstream_gene_variant	Sobic.008G049250	MODIFIER
Chr08_52816247_52818204_DEL	0 (0/35)	0 (0/31)	0 (0/31)	0 (0/30)	0.16 (3/31)	0 (0/56)	0 (0/47)	0.84 (16/37)	1.80042e-17	0	8	upstream_gene_variant	Sobic.008G117600	MODIFIER	OsGrx_C12 - glutaredoxin subgroup III
Chr08_53092388_53092504_DEL	0 (0/38)	0 (0/40)	0.05 (1/32)	0.11 (2/25)	0.11 (2/33)	0 (0/47)	0 (0/46)	0.74 (14/33)	3.97816e-14	0	8	upstream_gene_variant	Sobic.008G118500	MODIFIER	tRNA synthetase
Chr08_53294234_53294346_DEL	0 (0/39)	0 (0/39)	0 (0/32)	0 (0/21)	0.07 (1/26)	0 (0/43)	0 (0/49)	0.93 (13/35)	1.48788e-15	0	8	intergenic_region	Sobic.008G120132-Sobic.008G120200	MODIFIER
Chr08_53711588_53717859_DEL	0.71 (29/35)	0 (0/29)	0.02 (1/31)	0.2 (8/29)	0.07 (3/33)	0 (0/55)	0 (0/43)	0 (0/30)	9.4393e-28	0	1	exon_loss_variant&splice_acceptor_variant&3_prime_UTR_truncation&exon_loss_variant&splice_region_variant&intron_variant	Sobic.008G121080	HIGH
Chr08_53846288_53846398_DEL	0.82 (23/31)	0 (0/43)	0 (0/34)	0 (0/29)	0.14 (4/39)	0 (0/51)	0 (0/50)	0.04 (1/38)	4.3086e-33	0	1	downstream_gene_variant	Sobic.008G121400	MODIFIER	expressed protein
Chr08_53915769_53921585_DEL	0.86 (19/32)	0 (0/36)	0 (0/36)	0 (0/29)	0.14 (3/34)	0 (0/52)	0 (0/50)	0 (0/35)	1.66138e-26	0	1	upstream_gene_variant	Sobic.008G121501	MODIFIER
Chr08_53923812_53927272_DEL	0.83 (19/32)	0 (0/35)	0 (0/33)	0 (0/27)	0.17 (4/33)	0 (0/39)	0 (0/43)	0 (0/36)	1.11552e-22	0	1
Chr08_54039946_54040614_DEL	0 (0/37)	0.88 (15/40)	0 (0/29)	0.06 (1/31)	0.06 (1/28)	0 (0/51)	0 (0/39)	0 (0/31)	2.44675e-14	0	2	intergenic_region	Sobic.008G121800-Sobic.008G121850	MODIFIER
Chr08_54435051_54435146_DEL	0 (0/26)	0.13 (2/36)	0 (0/35)	0 (0/27)	0 (0/34)	0.87 (13/46)	0 (0/50)	0 (0/35)	3.91355e-10	0	6	intergenic_region	Sobic.008G122300-Sobic.008G122400	MODIFIER
Chr08_55440110_55440728_DEL	0.85 (29/34)	0 (0/43)	0 (0/35)	0 (0/29)	0.03 (1/37)	0.06 (2/54)	0 (0/51)	0.06 (2/34)	2.2063e-39	0	1	intergenic_region	Sobic.008G128200-Sobic.008G128500	MODIFIER
Chr08_56143481_56143713_DEL	0 (0/38)	0.03 (1/36)	0 (0/26)	0 (0/25)	0.07 (2/34)	0.79 (23/40)	0.03 (1/47)	0.07 (2/36)	3.60607e-19	0	6	upstream_gene_variant	Sobic.008G133700	MODIFIER	MYB family transcription factor
Chr08_5650807_5650902_DEL	0.04 (1/38)	0 (0/39)	0.17 (4/31)	0 (0/23)	0.04 (1/33)	0 (0/49)	0.75 (18/43)	0 (0/35)	1.98455e-13	0	7	upstream_gene_variant	Sobic.008G055500	MODIFIER	Protein-tyrosine phosphatase domain containing protein
Chr08_57051968_57053543_DEL	0.88 (15/27)	0 (0/40)	0 (0/32)	0 (0/28)	0.12 (2/37)	0 (0/46)	0 (0/52)	0 (0/34)	6.34493e-25	0	1	downstream_gene_variant	Sobic.008G139700	MODIFIER	bromodomain associated family protein
Chr08_57314480_57314620_DEL	0.79 (19/31)	0 (0/43)	0 (0/35)	0 (0/15)	0.21 (5/38)	0 (0/53)	0 (0/50)	0 (0/39)	2.59462e-25	0	1	upstream_gene_variant	Sobic.008G142000	MODIFIER	expressed protein
Chr08_57580959_57581557_DEL	0.83 (34/39)	0.02 (1/38)	0 (0/29)	0 (0/30)	0.12 (5/35)	0 (0/51)	0.02 (1/40)	0 (0/31)	1.1792e-34	0	1	upstream_gene_variant	Sobic.008G144401	MODIFIER	cytochrome P450
Chr08_58054088_58055872_DEL	0.81 (30/37)	0 (0/29)	0 (0/29)	0 (0/31)	0.19 (7/37)	0 (0/53)	0 (0/43)	0 (0/31)	4.5476e-32	0	1	intergenic_region	Sobic.008G147000-Sobic.008G147101	MODIFIER
Chr08_58182692_58182779_DEL	0.11 (2/39)	0 (0/42)	0 (0/34)	0 (0/23)	0.11 (2/35)	0 (0/50)	0 (0/51)	0.78 (14/32)	1.35261e-16	0	8	upstream_gene_variant	Sobic.008G148500	MODIFIER	expressed protein
Chr08_58310185_58310278_DEL	0 (0/36)	0 (0/40)	0 (0/33)	1 (15/22)	0 (0/35)	0 (0/44)	0 (0/50)	0 (0/33)	1.91134e-36	0	4	downstream_gene_variant	Sobic.008G150100	MODIFIER	resistance protein
Chr08_58580912_58582984_DEL	0.71 (20/32)	0 (0/42)	0 (0/35)	0 (0/31)	0.14 (4/35)	0.07 (2/57)	0 (0/48)	0.07 (2/36)	6.70969e-23	0	1	downstream_gene_variant	Sobic.008G153500	MODIFIER	KH domain containing protein
Chr08_58685748_58686815_DEL	0.78 (25/38)	0 (0/30)	0 (0/30)	0 (0/29)	0.16 (5/35)	0 (0/53)	0 (0/43)	0.06 (2/35)	3.93886e-24	0	1	upstream_gene_variant	Sobic.008G154200	MODIFIER	helix-loop-helix DNA-binding domain containing protein
Chr08_58740404_58740800_DEL	0.79 (11/29)	0 (0/33)	0 (0/29)	0 (0/31)	0.21 (3/33)	0 (0/55)	0 (0/45)	0 (0/31)	6.15434e-14	0	1	downstream_gene_variant	Sobic.008G154700	MODIFIER	expressed protein
Chr08_59053933_59054081_DEL	0.8 (24/29)	0 (0/38)	0 (0/34)	0 (0/22)	0.1 (3/35)	0.1 (3/43)	0 (0/49)	0 (0/36)	5.08776e-32	0	1	downstream_gene_variant	Sobic.008G157950	MODIFIER
Chr08_59637865_59642255_DEL	0.79 (34/40)	0.02 (1/38)	0.07 (3/18)	0 (0/31)	0.09 (4/37)	0.02 (1/56)	0 (0/51)	0 (0/36)	2.16485e-33	0	1	downstream_gene_variant	Sobic.008G162600	MODIFIER	fatty acid hydroxylase
Chr08_59983862_59985528_DEL	0.79 (19/33)	0 (0/31)	0 (0/29)	0 (0/30)	0.17 (4/32)	0 (0/54)	0 (0/41)	0.04 (1/29)	1.23246e-20	0	1	frameshift_variant&stop_lost&splice_region_variant	Sobic.008G166200	HIGH	expressed protein
Chr08_60198906_60199939_DEL	0.82 (18/37)	0 (0/36)	0 (0/32)	0 (0/29)	0.18 (4/33)	0 (0/57)	0 (0/47)	0 (0/34)	5.8447e-20	0	1	upstream_gene_variant	Sobic.008G168000	MODIFIER	Methyltransferase small domain containing protein
Chr08_60283657_60292132_DEL	0 (0/26)	0.94 (15/41)	0 (0/31)	0.06 (1/29)	0 (0/30)	0 (0/52)	0 (0/48)	0 (0/29)	3.85223e-15	0	2	upstream_gene_variant	Sobic.008G168650	MODIFIER	OsFBX358 - F-box domain containing protein
Chr08_60813653_60813761_DEL	0.79 (23/35)	0 (0/40)	0 (0/35)	0 (0/19)	0.14 (4/31)	0.03 (1/50)	0 (0/52)	0.03 (1/33)	4.91602e-25	0	1	downstream_gene_variant	Sobic.008G173500	MODIFIER
Chr08_60920502_60920606_DEL	0.72 (13/35)	0 (0/39)	0 (0/33)	0 (0/27)	0.22 (4/37)	0 (0/45)	0.06 (1/47)	0 (0/36)	1.66388e-12	0	1	upstream_gene_variant	Sobic.008G174850	MODIFIER
Chr08_61246250_61246422_DEL	0.95 (19/35)	0 (0/34)	0 (0/29)	0 (0/21)	0.05 (1/36)	0 (0/49)	0 (0/45)	0 (0/31)	7.69471e-24	0	1	upstream_gene_variant	Sobic.008G178600	MODIFIER	NBS-LRR disease resistance protein
Chr08_61502263_61503108_DEL	0.1 (2/36)	0 (0/36)	0 (0/28)	0 (0/31)	0.15 (3/33)	0 (0/55)	0.05 (1/37)	0.7 (14/38)	6.40979e-11	0	8	upstream_gene_variant	Sobic.008G181250	MODIFIER	ubiquitin-conjugating enzyme
Chr08_62493069_62493597_DEL	0.91 (30/40)	0 (0/34)	0 (0/30)	0 (0/28)	0.09 (3/37)	0 (0/49)	0 (0/39)	0 (0/35)	5.88952e-33	0	1	upstream_gene_variant	Sobic.008G190800	MODIFIER	DUF260 domain containing protein
Chr08_7307715_7308147_DEL	0.8 (16/36)	0 (0/32)	0 (0/30)	0 (0/29)	0.2 (4/33)	0 (0/53)	0 (0/42)	0 (0/33)	1.6572e-16	0	1	downstream_gene_variant	Sobic.008G065400	MODIFIER
Chr08_9181648_9181720_DEL	0.89 (17/32)	0 (0/40)	0 (0/32)	0 (0/23)	0.11 (2/32)	0 (0/43)	0 (0/49)	0 (0/33)	2.13504e-22	0	1	downstream_gene_variant	Sobic.008G070350	MODIFIER	phosphoribosylamine--glycine ligase
Chr09_10045313_10045382_DEL	0.93 (26/30)	0 (0/40)	0 (0/33)	0 (0/29)	0.07 (2/33)	0 (0/47)	0 (0/49)	0 (0/35)	4.21407e-42	0	1	intergenic_region	Sobic.009G076500-Sobic.009G076600	MODIFIER
Chr09_10235846_10235902_DEL	0 (0/38)	0 (0/40)	0 (0/32)	0 (0/23)	0.06 (1/32)	0.94 (15/45)	0 (0/51)	0 (0/36)	4.67988e-14	0	6	intergenic_region	Sobic.009G077200-Sobic.009G077250	MODIFIER
Chr09_10317905_10318595_DEL	0 (0/34)	0.21 (5/34)	0.04 (1/30)	0.75 (18/29)	0 (0/33)	0 (0/54)	0 (0/40)	0 (0/33)	1.36521e-22	0	4	intergenic_region	Sobic.009G077300-Sobic.009G077400	MODIFIER
Chr09_11026500_11040623_DEL	0.88 (21/38)	0 (0/29)	0 (0/28)	0 (0/30)	0.12 (3/32)	0 (0/54)	0 (0/40)	0 (0/28)	1.24423e-21	0	1	intergenic_region	Sobic.009G080266-Sobic.009G080300	MODIFIER
Chr09_13282864_13282940_DEL	0.82 (23/29)	0 (0/40)	0 (0/31)	0 (0/22)	0.04 (1/35)	0 (0/49)	0 (0/48)	0.14 (4/35)	2.46773e-32	0	1	upstream_gene_variant	Sobic.009G084000	MODIFIER	ubiquitin-conjugating enzyme
Chr09_13752664_13752813_DEL	0.91 (20/28)	0 (0/44)	0 (0/35)	0 (0/28)	0.09 (2/36)	0 (0/49)	0 (0/51)	0 (0/38)	1.75907e-35	0	1	intergenic_region	Sobic.009G084500-Sobic.009G084600	MODIFIER
Chr09_14793782_14793861_DEL	0.23 (3/36)	0 (0/36)	0 (0/34)	0 (0/29)	0.77 (10/28)	0 (0/41)	0 (0/48)	0 (0/33)	1.02879e-12	0	5	frameshift_variant&stop_lost	Sobic.009G086900	HIGH	expressed protein
Chr09_14814432_14815494_DEL	0 (0/33)	0 (0/33)	0 (0/33)	1 (20/29)	0 (0/32)	0 (0/55)	0 (0/40)	0 (0/30)	1.04146e-34	0	4	downstream_gene_variant	Sobic.009G087000	MODIFIER	MCM6 - Putative minichromosome maintenance MCM complex subunit 6
Chr09_15826458_15828042_DEL	0 (0/32)	0.05 (1/34)	0.05 (1/30)	0 (0/30)	0.05 (1/32)	0.86 (18/53)	0 (0/44)	0 (0/34)	1.96393e-11	0	6	intergenic_region	Sobic.009G089532-Sobic.009G089700	MODIFIER
Chr09_16973731_16974471_DEL	0.16 (3/38)	0 (0/37)	0 (0/28)	0.79 (15/24)	0.05 (1/33)	0 (0/54)	0 (0/38)	0 (0/35)	3.15116e-24	0	4	frameshift_variant&start_lost	Sobic.009G090100	HIGH	OsSCP28 - Putative Serine Carboxypeptidase homologue
Chr09_17754892_17754994_DEL	0.05 (1/36)	0 (0/41)	0 (0/34)	0.84 (16/22)	0.11 (2/36)	0 (0/45)	0 (0/48)	0 (0/32)	6.77933e-32	0	4	upstream_gene_variant	Sobic.009G090800	MODIFIER	CRAL/TRIO domain containing protein
Chr09_18801783_18801867_DEL	0 (0/40)	0 (0/41)	0 (0/32)	1 (16/24)	0 (0/32)	0 (0/41)	0 (0/48)	0 (0/33)	5.15136e-35	0	4	intergenic_region	Sobic.009G091101-Sobic.009G091200	MODIFIER
Chr09_1984483_1988967_DEL	0.75 (24/29)	0.03 (1/33)	0.03 (1/31)	0 (0/29)	0.16 (5/36)	0.03 (1/55)	0 (0/48)	0 (0/37)	2.93349e-31	0	1	upstream_gene_variant	Sobic.009G022400	MODIFIER	ribosomal protein L13
Chr09_24515480_24516093_DEL	0 (0/31)	0 (0/34)	0 (0/30)	1 (16/26)	0 (0/34)	0 (0/53)	0 (0/47)	0 (0/36)	7.21906e-32	0	4	intergenic_region	Sobic.009G093900-Sobic.009G094200	MODIFIER
Chr09_25262667_25266182_DEL	0 (0/36)	0 (0/29)	0 (0/32)	1 (17/26)	0 (0/31)	0 (0/52)	0 (0/41)	0 (0/34)	1.22694e-32	0	4	intergenic_region	Sobic.009G094600-Sobic.009G094700	MODIFIER
Chr09_2842494_2854272_DEL	0.85 (28/38)	0 (0/41)	0 (0/33)	0 (0/28)	0.12 (4/37)	0.03 (1/52)	0 (0/47)	0 (0/35)	2.02932e-32	0	1	downstream_gene_variant	Sobic.009G031900	MODIFIER	MYB family transcription factor
Chr09_2907929_2908005_DEL	0.78 (18/34)	0 (0/38)	0 (0/32)	0 (0/24)	0.04 (1/34)	0.17 (4/42)	0 (0/48)	0 (0/37)	4.37854e-19	0	1	intergenic_region	Sobic.009G032300-Sobic.009G032350	MODIFIER
Chr09_34478946_34479565_DEL	0 (0/38)	0 (0/35)	0 (0/32)	1 (17/27)	0 (0/34)	0 (0/53)	0 (0/43)	0 (0/30)	1.15693e-32	0	4	intergenic_region	Sobic.009G097000-Sobic.009G097100	MODIFIER
Chr09_34530525_34530616_DEL	0 (0/37)	0 (0/41)	0 (0/33)	1 (18/25)	0 (0/34)	0 (0/45)	0 (0/46)	0 (0/37)	6.14044e-39	0	4	intergenic_region	Sobic.009G097000-Sobic.009G097100	MODIFIER
Chr09_3470935_3471952_DEL	0.8 (16/37)	0 (0/33)	0 (0/27)	0 (0/30)	0.2 (4/34)	0 (0/50)	0 (0/42)	0 (0/31)	1.35421e-15	0	1	upstream_gene_variant	Sobic.009G036700	MODIFIER	EGG APPARATUS-1
Chr09_3628850_3628954_DEL	1 (13/20)	0 (0/42)	0 (0/31)	0 (0/25)	0 (0/32)	0 (0/45)	0 (0/48)	0 (0/39)	2.17019e-33	0	1	upstream_gene_variant	Sobic.009G038900	MODIFIER	CGMC_MAPKCGMC_2.1 - CGMC includes CDA, MAPK, GSK3, and CLKC kinases
Chr09_40300431_40308014_DEL	0 (0/33)	0 (0/35)	0 (0/31)	0.89 (16/28)	0.11 (2/34)	0 (0/53)	0 (0/42)	0 (0/34)	3.53346e-25	0	4	intergenic_region	Sobic.009G101200-Sobic.009G101250	MODIFIER
Chr09_40421164_40422202_DEL	0 (0/32)	0 (0/37)	0 (0/29)	0.9 (18/30)	0.1 (2/34)	0 (0/55)	0 (0/42)	0 (0/33)	6.79678e-27	0	4	intergenic_region	Sobic.009G101250-Sobic.009G101300	MODIFIER
Chr09_40753417_40765528_DEL	0 (0/39)	0 (0/40)	0 (0/32)	0.93 (13/22)	0.07 (1/34)	0 (0/47)	0 (0/49)	0 (0/32)	8.4387e-29	0	4	5_prime_UTR_variant	Sobic.009G102000	MODIFIER	OsFBX9 - F-box domain containing protein
Chr09_42360356_42360777_DEL	0 (0/32)	0.06 (1/38)	0.06 (1/29)	0 (0/29)	0.06 (1/33)	0.78 (14/54)	0 (0/42)	0.06 (1/32)	4.67461e-07	0	6	intron_variant	Sobic.009G104800	MODIFIER	AMP deaminase
Chr09_42729732_42729811_DEL	0.95 (18/30)	0 (0/41)	0 (0/31)	0 (0/28)	0.05 (1/35)	0 (0/51)	0 (0/51)	0 (0/38)	3.92883e-30	0	1	intergenic_region	Sobic.009G105050-Sobic.009G105100	MODIFIER
Chr09_44196936_44197105_DEL	0.93 (14/27)	0 (0/41)	0 (0/35)	0 (0/28)	0.07 (1/34)	0 (0/54)	0 (0/48)	0 (0/36)	2.148e-25	0	1	intergenic_region	Sobic.009G109700-Sobic.009G109775	MODIFIER
Chr09_44347690_44347814_DEL	0.7 (16/31)	0 (0/44)	0 (0/32)	0.17 (4/21)	0.04 (1/40)	0.04 (1/53)	0 (0/48)	0.04 (1/37)	2.86069e-18	0	1	intergenic_region	Sobic.009G109775-Sobic.009G109850	MODIFIER
Chr09_44783472_44783649_DEL	0.95 (18/31)	0 (0/39)	0 (0/34)	0 (0/24)	0.05 (1/37)	0 (0/46)	0 (0/47)	0 (0/32)	3.23416e-27	0	1	upstream_gene_variant	Sobic.009G111200	MODIFIER	AP2 domain containing protein
Chr09_44786374_44786459_DEL	0.96 (24/36)	0 (0/39)	0 (0/30)	0 (0/24)	0.04 (1/32)	0 (0/45)	0 (0/44)	0 (0/36)	6.97252e-31	0	1	3_prime_UTR_variant	Sobic.009G111200	MODIFIER	AP2 domain containing protein
Chr09_44992840_44993988_DEL	0.95 (38/41)	0 (0/40)	0 (0/29)	0 (0/30)	0.05 (2/37)	0 (0/52)	0 (0/43)	0 (0/35)	2.84215e-46	0	1	exon_loss_variant	Sobic.009G111901	HIGH
Chr09_45017694_45024711_DEL	0.94 (15/30)	0 (0/33)	0 (0/28)	0 (0/30)	0.06 (1/33)	0 (0/53)	0 (0/42)	0 (0/30)	7.24848e-22	0	1	upstream_gene_variant	Sobic.009G112101	MODIFIER
Chr09_45614230_45614328_DEL	0.93 (27/37)	0 (0/42)	0 (0/35)	0 (0/22)	0.07 (2/36)	0 (0/40)	0 (0/49)	0 (0/34)	7.26256e-34	0	1	frameshift_variant&splice_acceptor_variant&splice_region_variant&intron_variant	Sobic.009G115050	HIGH
Chr09_46061806_46063338_DEL	1 (20/26)	0 (0/33)	0 (0/31)	0 (0/29)	0 (0/33)	0 (0/50)	0 (0/48)	0 (0/34)	2.43015e-39	0	1	upstream_gene_variant	Sobic.009G117000	MODIFIER	expressed protein
Chr09_46844366_46846039_DEL	0 (0/37)	0 (0/37)	0.03 (1/34)	0.1 (3/27)	0.13 (4/34)	0 (0/55)	0.73 (22/45)	0 (0/32)	7.18535e-16	0	7	intergenic_region	Sobic.009G119200-Sobic.009G119300	MODIFIER
Chr09_47158357_47158856_DEL	0 (0/36)	0 (0/36)	0.15 (8/26)	0.05 (3/27)	0.02 (1/31)	0.04 (2/49)	0.71 (39/47)	0.04 (2/33)	1.36126e-24	0	7	downstream_gene_variant	Sobic.009G121000	MODIFIER	expressed protein
Chr09_47600875_47603727_DEL	0 (0/35)	0 (0/31)	0 (0/31)	0 (0/30)	0.16 (3/33)	0 (0/54)	0.05 (1/43)	0.79 (15/29)	3.71096e-19	0	8	upstream_gene_variant	Sobic.009G123600	MODIFIER	tungus CG8253-PA
Chr09_47952061_47966646_DEL	0 (0/37)	0 (0/34)	0.11 (2/28)	0.79 (15/27)	0.11 (2/31)	0 (0/50)	0 (0/43)	0 (0/28)	4.01789e-20	0	4	downstream_gene_variant	Sobic.009G126100	MODIFIER	glycosyltransferase
Chr09_48119836_48119976_DEL	0.8 (28/30)	0.03 (1/40)	0 (0/32)	0 (0/28)	0.14 (5/34)	0 (0/47)	0 (0/48)	0.03 (1/36)	5.92139e-38	0	1	upstream_gene_variant	Sobic.009G127600	MODIFIER	tetratricopeptide-like helical
Chr09_48138101_48148020_DEL	0.75 (27/29)	0.08 (3/43)	0 (0/32)	0 (0/28)	0.11 (4/32)	0 (0/52)	0 (0/48)	0.06 (2/35)	2.33802e-35	0	1	feature_ablation	Sobic.009G127900&Sobic.009G128000	HIGH
Chr09_48327763_48328172_DEL	0 (0/31)	0 (0/31)	0.05 (1/30)	0 (0/27)	0 (0/35)	0.05 (1/53)	0.9 (18/47)	0 (0/33)	1.60645e-14	0	7	upstream_gene_variant	Sobic.009G129900	MODIFIER	endo-1,3;1,4-beta-D-glucanase precursor
Chr09_4892928_4893100_DEL	0.88 (23/28)	0 (0/34)	0 (0/31)	0 (0/25)	0.08 (2/30)	0 (0/50)	0 (0/48)	0.04 (1/33)	4.05784e-35	0	1	intergenic_region	Sobic.009G049300-Sobic.009G049400	MODIFIER
Chr09_49035516_49036700_DEL	0.08 (2/37)	0 (0/36)	0 (0/34)	0.04 (1/30)	0.08 (2/32)	0.04 (1/53)	0.04 (1/46)	0.71 (17/31)	7.3195e-18	0	8	intergenic_region	Sobic.009G135100-Sobic.009G135300	MODIFIER
Chr09_49893992_49895129_DEL	0 (0/34)	0 (0/33)	0.1 (3/32)	0 (0/31)	0.1 (3/34)	0.07 (2/53)	0.72 (21/32)	0 (0/32)	7.03713e-21	0	7	upstream_gene_variant	Sobic.009G141700	MODIFIER	expressed protein
Chr09_4994105_4996661_DEL	0 (0/31)	0 (0/38)	0.12 (6/29)	0.08 (4/28)	0 (0/34)	0.06 (3/54)	0.72 (36/46)	0.02 (1/32)	3.76227e-24	0	7	transcript_ablation	Sobic.009G049850	HIGH	pattern formation protein EMB30
Chr09_4997091_4998596_DEL	0.94 (31/41)	0 (0/31)	0 (0/31)	0 (0/29)	0.06 (2/33)	0 (0/51)	0 (0/43)	0 (0/33)	1.75968e-34	0	1	exon_loss_variant	Sobic.009G049900	HIGH	peptide transporter PTR2
Chr09_50970326_50970417_DEL	0.81 (17/30)	0 (0/41)	0 (0/33)	0 (0/25)	0.19 (4/32)	0 (0/44)	0 (0/51)	0 (0/36)	8.03144e-23	0	1	5_prime_UTR_variant	Sobic.009G153366	MODIFIER
Chr09_51067619_51067692_DEL	0 (0/39)	0 (0/39)	0.04 (1/32)	0 (0/25)	0 (0/36)	0.04 (1/49)	0.92 (22/36)	0 (0/38)	2.67921e-27	0	7	intergenic_region	Sobic.009G154100-Sobic.009G154200	MODIFIER
Chr09_51293265_51293373_DEL	0.96 (27/31)	0 (0/43)	0 (0/34)	0 (0/23)	0.04 (1/35)	0 (0/45)	0 (0/50)	0 (0/38)	1.23754e-44	0	1	upstream_gene_variant	Sobic.009G155600	MODIFIER	60S acidic ribosomal protein
Chr09_51680248_51680345_DEL	0 (0/40)	0 (0/42)	0.17 (4/27)	0 (0/25)	0.08 (2/37)	0 (0/50)	0.75 (18/43)	0 (0/39)	1.39426e-14	0	7	intron_variant	Sobic.009G159200	MODIFIER	guanylyl cyclase
Chr09_52318403_52318578_DEL	0.87 (13/31)	0 (0/40)	0 (0/32)	0 (0/25)	0.13 (2/35)	0 (0/47)	0 (0/41)	0 (0/32)	1.23143e-16	0	1	upstream_gene_variant	Sobic.009G166700	MODIFIER	expressed protein
Chr09_53336381_53337060_DEL	0 (0/27)	0 (0/40)	0.11 (4/34)	0 (0/27)	0.06 (2/35)	0.09 (3/56)	0.74 (26/53)	0 (0/35)	2.76309e-15	0	7	upstream_gene_variant	Sobic.009G178600	MODIFIER	ADP-ribosylation factor
Chr09_5365712_5370610_DEL	0 (0/39)	0 (0/41)	0 (0/25)	0 (0/24)	0 (0/37)	0 (0/53)	0.94 (16/43)	0.06 (1/33)	5.51393e-16	0	7	splice_acceptor_variant&3_prime_UTR_truncation&exon_loss_variant&splice_region_variant&intron_variant	Sobic.009G053201	HIGH
Chr09_54326941_54327062_DEL	0.73 (22/28)	0 (0/41)	0.17 (5/27)	0 (0/27)	0.07 (2/33)	0 (0/44)	0 (0/48)	0.03 (1/32)	2.58893e-27	0	1	upstream_gene_variant	Sobic.009G191100	MODIFIER	expressed protein
Chr09_54594650_54594785_DEL	0.83 (24/29)	0 (0/43)	0 (0/31)	0 (0/26)	0.17 (5/31)	0 (0/49)	0 (0/50)	0 (0/34)	2.12291e-35	0	1	3_prime_UTR_variant	Sobic.009G194900	MODIFIER	glucan endo-1,3-beta-glucosidase-like protein 3 precursor
Chr09_55081692_55081778_DEL	0.79 (11/35)	0 (0/37)	0 (0/28)	0 (0/23)	0 (0/35)	0 (0/40)	0 (0/49)	0.21 (3/35)	1.03697e-10	0	1	downstream_gene_variant	Sobic.009G201100	MODIFIER	metalloendoproteinase 1 precursor
Chr09_55753009_55753393_DEL	0.79 (15/41)	0 (0/38)	0 (0/35)	0 (0/30)	0.16 (3/38)	0 (0/57)	0 (0/51)	0.05 (1/37)	1.38442e-14	0	1	upstream_gene_variant	Sobic.009G211400	MODIFIER	endonuclease/exonuclease/phosphatase family domain containing protein
Chr09_55834584_55834652_DEL	0 (0/39)	0 (0/41)	0.2 (5/30)	0 (0/23)	0 (0/34)	0.04 (1/48)	0.76 (19/45)	0 (0/37)	1.11431e-14	0	7	upstream_gene_variant	Sobic.009G212800	MODIFIER	WRKY7
Chr09_56454571_56454720_DEL	0 (0/39)	0 (0/40)	0.14 (3/34)	0 (0/27)	0.1 (2/36)	0.71 (15/39)	0 (0/54)	0.05 (1/38)	2.12412e-12	0	6	upstream_gene_variant	Sobic.009G221400	MODIFIER	B3 DNA binding domain containing protein
Chr09_56557815_56557939_DEL	0 (0/36)	0 (0/40)	0.07 (1/34)	0 (0/24)	0.07 (1/35)	0.87 (13/36)	0 (0/47)	0 (0/34)	1.07668e-13	0	6	intergenic_region	Sobic.009G222900-Sobic.009G223100	MODIFIER
Chr09_56894378_56894504_DEL	0.94 (16/32)	0 (0/44)	0 (0/35)	0 (0/28)	0.06 (1/39)	0 (0/52)	0 (0/52)	0 (0/39)	7.05602e-26	0	1	upstream_gene_variant	Sobic.009G227650	MODIFIER
Chr09_57564201_57564344_DEL	0 (0/35)	0 (0/38)	0.17 (3/32)	0.72 (13/19)	0.06 (1/32)	0 (0/44)	0.06 (1/47)	0 (0/34)	4.16359e-24	0	4	downstream_gene_variant	Sobic.009G237350	MODIFIER	OsFBX121 - F-box domain containing protein
Chr09_57590330_57593907_DEL	0.03 (1/39)	0.03 (1/41)	0.06 (2/32)	0 (0/25)	0.11 (4/35)	0.06 (2/51)	0.72 (26/43)	0 (0/36)	4.49064e-19	0	7	upstream_gene_variant	Sobic.009G237700	MODIFIER	aldose 1-epimerase
Chr09_57718528_57719408_DEL	0 (0/34)	1 (13/33)	0 (0/32)	0 (0/30)	0 (0/32)	0 (0/51)	0 (0/43)	0 (0/30)	1.52441e-18	0	2	splice_region_variant	Sobic.009G239500	LOW	CTP synthase
Chr09_57852812_57853720_DEL	0 (0/41)	0 (0/43)	0 (0/32)	0.87 (13/21)	0.13 (2/36)	0 (0/54)	0 (0/46)	0 (0/27)	9.81248e-29	0	4	upstream_gene_variant	Sobic.009G241700	MODIFIER	oxidoreductase, 2OG-FeII oxygenase domain containing protein
Chr09_57938888_57939624_DEL	0 (0/35)	0 (0/32)	0 (0/30)	0 (0/29)	0.03 (1/32)	0.06 (2/52)	0.91 (31/45)	0 (0/34)	8.62402e-29	0	7	upstream_gene_variant	Sobic.009G242900	MODIFIER	expressed protein
Chr09_58203931_58212201_DEL	0.84 (32/36)	0 (0/30)	0 (0/26)	0 (0/30)	0.11 (4/34)	0.03 (1/53)	0 (0/41)	0.03 (1/33)	5.93961e-35	0	1	upstream_gene_variant	Sobic.009G246400	MODIFIER	polyprenyl synthetase
Chr09_58302644_58305036_DEL	0 (0/37)	0 (0/32)	0.13 (4/31)	0.77 (23/28)	0.07 (2/36)	0.03 (1/51)	0 (0/41)	0 (0/33)	7.55272e-31	0	4	exon_loss_variant	Sobic.009G247601	HIGH	pre-mRNA-processing factor 6
Chr09_58312365_58313128_DEL	0 (0/37)	0 (0/31)	0.04 (1/33)	0.93 (25/30)	0.04 (1/37)	0 (0/39)	0 (0/44)	0 (0/35)	1.85963e-38	0	4	upstream_gene_variant	Sobic.009G248000	MODIFIER	harpin-induced protein 1 domain containing protein
Chr09_59154303_59154936_DEL	0 (0/33)	0 (0/30)	0.03 (1/28)	0.93 (27/29)	0 (0/33)	0.03 (1/53)	0 (0/41)	0 (0/31)	2.57373e-42	0	4	upstream_gene_variant	Sobic.009G257300	MODIFIER	ELF3 protein
Chr09_6180848_6186253_DEL	0 (0/41)	0 (0/36)	0.06 (1/34)	0.82 (14/29)	0.06 (1/37)	0.06 (1/52)	0 (0/49)	0 (0/32)	2.8534e-20	0	4	downstream_gene_variant	Sobic.009G059000	MODIFIER
Chr09_6427892_6428053_DEL	0 (0/38)	0 (0/42)	0 (0/31)	0.88 (14/24)	0.06 (1/37)	0.06 (1/51)	0 (0/48)	0 (0/36)	2.35705e-27	0	4	downstream_gene_variant	Sobic.009G061601	MODIFIER
Chr09_8553072_8553167_DEL	0.95 (20/28)	0 (0/42)	0 (0/34)	0 (0/26)	0.05 (1/36)	0 (0/47)	0 (0/48)	0 (0/38)	4.99858e-36	0	1	downstream_gene_variant	Sobic.009G071600	MODIFIER	no apical meristem protein
Chr09_9037669_9037753_DEL	0.73 (19/36)	0 (0/40)	0.12 (3/28)	0.04 (1/24)	0.12 (3/33)	0 (0/44)	0 (0/47)	0 (0/37)	3.73682e-17	0	1	intergenic_region	Sobic.009G072900-Sobic.009G073000	MODIFIER
Chr09_9961624_9961755_DEL	0.77 (24/29)	0 (0/43)	0 (0/35)	0 (0/29)	0.1 (3/35)	0 (0/51)	0 (0/50)	0.13 (4/36)	5.03164e-34	0	1	upstream_gene_variant	Sobic.009G076300	MODIFIER	expressed protein
Chr10_10637082_10647882_DEL	0 (0/38)	0 (0/36)	0 (0/34)	0 (0/28)	0.25 (8/37)	0.03 (1/55)	0.72 (23/48)	0 (0/36)	3.79883e-17	0	7	upstream_gene_variant	Sobic.010G107901	MODIFIER	ZOS5-11 - C2H2 zinc finger protein
Chr10_12823333_12823424_DEL	0.85 (29/41)	0 (0/42)	0 (0/35)	0 (0/26)	0.15 (5/35)	0 (0/49)	0 (0/47)	0 (0/37)	2.19362e-31	0	1	upstream_gene_variant	Sobic.010G117000	MODIFIER	anthocyanin 3-O-beta-glucosyltransferase
Chr10_14737717_14737796_DEL	0.06 (1/40)	0 (0/42)	0 (0/33)	0 (0/27)	0.06 (1/30)	0 (0/42)	0 (0/50)	0.88 (15/30)	1.555e-21	0	8	intergenic_region	Sobic.010G123800-Sobic.010G123901	MODIFIER
Chr10_15734642_15747096_DEL	0 (0/33)	0 (0/34)	0.14 (3/30)	0.81 (17/29)	0.05 (1/34)	0 (0/52)	0 (0/44)	0 (0/33)	5.53507e-23	0	4	intergenic_region	Sobic.010G126000-Sobic.010G126100	MODIFIER
Chr10_17198142_17205376_DEL	0.03 (1/43)	0 (0/38)	0.09 (3/28)	0 (0/30)	0.15 (5/35)	0 (0/50)	0.71 (24/33)	0.03 (1/37)	3.68554e-24	0	7	upstream_gene_variant	Sobic.010G129000	MODIFIER	aspartic proteinase nepenthesin-2 precursor
Chr10_18384147_18384295_DEL	0.83 (15/30)	0 (0/42)	0 (0/31)	0 (0/27)	0.11 (2/34)	0 (0/48)	0 (0/50)	0.06 (1/37)	1.48993e-20	0	1	upstream_gene_variant	Sobic.010G132700	MODIFIER
Chr10_18679830_18680282_DEL	0.04 (1/32)	0 (0/32)	0 (0/28)	0 (0/29)	0.04 (1/30)	0 (0/54)	0 (0/42)	0.92 (24/35)	8.64666e-30	0	8	intergenic_region	Sobic.010G133100-Sobic.010G133150	MODIFIER
Chr10_19442565_19442642_DEL	0.04 (1/41)	0 (0/42)	0 (0/31)	0 (0/26)	0.09 (2/36)	0 (0/50)	0 (0/48)	0.87 (20/28)	1.471e-32	0	8	downstream_gene_variant	Sobic.010G133450	MODIFIER
Chr10_21467182_21467243_DEL	0 (0/36)	0.14 (4/37)	0 (0/29)	0 (0/25)	0.04 (1/36)	0.79 (22/44)	0 (0/48)	0.04 (1/33)	1.13192e-16	0	6	intergenic_region	Sobic.010G137200-Sobic.010G137300	MODIFIER
Chr10_2174670_2176840_DEL	0.93 (26/35)	0 (0/38)	0 (0/32)	0 (0/31)	0.04 (1/30)	0 (0/49)	0 (0/44)	0.04 (1/28)	1.80529e-33	0	1	upstream_gene_variant	Sobic.010G027000	MODIFIER	enolase
Chr10_25362871_25362979_DEL	0 (0/38)	0.07 (1/43)	0.07 (1/29)	0.07 (1/26)	0 (0/35)	0 (0/54)	0.8 (12/45)	0 (0/38)	4.28366e-09	0	7	downstream_gene_variant	Sobic.010G140100	MODIFIER
Chr10_26191908_26192037_DEL	0 (0/36)	0.22 (6/36)	0.04 (1/31)	0 (0/18)	0 (0/33)	0.7 (19/40)	0.04 (1/49)	0 (0/35)	6.28613e-14	0	6	intergenic_region	Sobic.010G140400-Sobic.010G140500	MODIFIER
Chr10_2634052_2635049_DEL	0.82 (27/39)	0 (0/30)	0 (0/29)	0 (0/30)	0.12 (4/33)	0 (0/51)	0 (0/40)	0.06 (2/28)	4.023e-25	0	1	upstream_gene_variant	Sobic.010G033300	MODIFIER	myristoyl-acyl carrier protein thioesterase, chloroplast precursor
Chr10_27266561_27311267_DEL	0 (0/37)	0.18 (3/37)	0 (0/32)	0 (0/31)	0 (0/36)	0.76 (13/51)	0 (0/48)	0.06 (1/35)	3.98343e-08	0	6	transcript_ablation	Sobic.010G140575	HIGH	retrotransposon protein, unclassified
Chr10_27516486_27517501_DEL	0 (0/29)	0.06 (1/32)	0.17 (3/30)	0.06 (1/31)	0 (0/32)	0 (0/54)	0.72 (13/43)	0 (0/33)	1.62041e-08	0	7	intergenic_region	Sobic.010G140575-Sobic.010G140600	MODIFIER
Chr10_2876704_2877076_DEL	0.78 (14/33)	0 (0/38)	0 (0/30)	0 (0/28)	0.22 (4/36)	0 (0/55)	0 (0/45)	0 (0/33)	3.68882e-16	0	1
Chr10_3062045_3063349_DEL	0.71 (24/33)	0 (0/31)	0 (0/30)	0.03 (1/28)	0.12 (4/32)	0.12 (4/53)	0 (0/42)	0.03 (1/33)	2.02861e-22	0	1	downstream_gene_variant	Sobic.010G038300	MODIFIER	OsFBDUF33 - F-box and DUF domain containing protein
Chr10_34835283_34835905_DEL	0 (0/32)	0.04 (1/34)	0.22 (5/28)	0.04 (1/28)	0 (0/32)	0 (0/54)	0.7 (16/45)	0 (0/34)	1.55077e-10	0	7	intergenic_region	Sobic.010G141400-Sobic.010G141433	MODIFIER
Chr10_3844601_3845459_DEL	0 (0/33)	0.75 (15/34)	0.05 (1/30)	0 (0/28)	0.15 (3/32)	0.05 (1/53)	0 (0/39)	0 (0/30)	5.71019e-14	0	2	frameshift_variant	Sobic.010G049700	HIGH	expressed protein
Chr10_42382406_42382913_DEL	0 (0/42)	0.26 (6/41)	0 (0/34)	0 (0/30)	0 (0/39)	0.7 (16/55)	0.04 (1/52)	0 (0/35)	8.72255e-10	0	6	upstream_gene_variant	Sobic.010G148200	MODIFIER	OsCML31 - Calmodulin-related calcium sensor protein
Chr10_42433482_42433751_DEL	0.04 (1/38)	0 (0/34)	0 (0/29)	0 (0/20)	0.08 (2/31)	0 (0/49)	0 (0/47)	0.88 (22/32)	2.62302e-28	0	8	splice_donor_variant&splice_region_variant&3_prime_UTR_variant&intron_variant	Sobic.010G148501	HIGH
Chr10_4267598_4268404_DEL	0.05 (1/33)	0 (0/37)	0.11 (2/33)	0 (0/31)	0.79 (15/34)	0 (0/54)	0 (0/41)	0.05 (1/35)	3.8144e-16	0	5	upstream_gene_variant	Sobic.010G054400	MODIFIER	leucine-rich repeat family protein
Chr10_43417227_43427420_DEL	0.1 (4/34)	0 (0/30)	0 (0/28)	0 (0/29)	0.2 (8/34)	0 (0/53)	0 (0/42)	0.71 (29/36)	1.11503e-26	0	8	intergenic_region	Sobic.010G150700-Sobic.010G150701	MODIFIER
Chr10_43685543_43685643_DEL	0.87 (20/25)	0 (0/43)	0 (0/34)	0 (0/27)	0.09 (2/28)	0 (0/50)	0 (0/53)	0.04 (1/31)	8.73069e-36	0	1	intergenic_region	Sobic.010G151000-Sobic.010G151050	MODIFIER
Chr10_44543006_44543071_DEL	0.85 (22/28)	0 (0/41)	0 (0/35)	0 (0/28)	0.15 (4/37)	0 (0/45)	0 (0/49)	0 (0/35)	8.06718e-35	0	1	downstream_gene_variant	Sobic.010G153100	MODIFIER	prefoldin
Chr10_44673162_44673762_DEL	0 (0/33)	0.02 (1/33)	0.2 (10/27)	0 (0/29)	0.02 (1/33)	0.04 (2/52)	0.71 (35/42)	0 (0/33)	3.19277e-27	0	7	downstream_gene_variant	Sobic.010G153700	MODIFIER	cyclic nucleotide-gated ion channel 1
Chr10_45537027_45545206_DEL	0.71 (29/34)	0 (0/44)	0.02 (1/37)	0 (0/29)	0.24 (10/35)	0 (0/55)	0.02 (1/51)	0 (0/27)	3.48112e-33	0	1	downstream_gene_variant	Sobic.010G154400	MODIFIER	expressed protein
Chr10_4653540_4653666_DEL	0.79 (19/29)	0.04 (1/40)	0 (0/34)	0 (0/26)	0.12 (3/33)	0.04 (1/43)	0 (0/48)	0 (0/38)	4.22156e-25	0	1	upstream_gene_variant	Sobic.010G059400	MODIFIER	exostosin family protein
Chr10_50186602_50186760_DEL	0.88 (21/30)	0 (0/41)	0 (0/35)	0 (0/28)	0.12 (3/38)	0 (0/45)	0 (0/46)	0 (0/37)	8.62245e-32	0	1	downstream_gene_variant	Sobic.010G170500	MODIFIER	Leucine Rich Repeat family protein
Chr10_50287488_50287580_DEL	0.76 (16/30)	0 (0/40)	0 (0/32)	0 (0/25)	0.14 (3/33)	0 (0/41)	0 (0/49)	0.1 (2/29)	3.02949e-18	0	1	downstream_gene_variant	Sobic.010G171300	MODIFIER	metal cation transporter
Chr10_50800745_50800843_DEL	0.81 (17/28)	0 (0/44)	0 (0/32)	0 (0/27)	0.14 (3/38)	0 (0/51)	0 (0/52)	0.05 (1/32)	2.08206e-25	0	1	downstream_gene_variant	Sobic.010G172800	MODIFIER	helix-loop-helix DNA-binding domain containing protein
Chr10_50814009_50823254_DEL	0.79 (30/35)	0 (0/33)	0 (0/30)	0 (0/27)	0.13 (5/35)	0 (0/50)	0.03 (1/38)	0.05 (2/31)	1.25629e-30	0	1	downstream_gene_variant	Sobic.010G172900	MODIFIER	histone deacetylase
Chr10_51920526_51920915_DEL	0.9 (18/26)	0 (0/37)	0 (0/32)	0 (0/29)	0.1 (2/35)	0 (0/55)	0 (0/45)	0 (0/36)	2.23626e-32	0	1	upstream_gene_variant	Sobic.010G180100	MODIFIER	transferase family protein
Chr10_51924897_51925488_DEL	0 (0/37)	0 (0/38)	0.05 (1/29)	0 (0/24)	0 (0/32)	0 (0/47)	0.95 (21/46)	0 (0/34)	2.02402e-19	0	7	splice_region_variant	Sobic.010G180100	LOW	transferase family protein
Chr10_52202010_52202094_DEL	0 (0/38)	0 (0/41)	0.11 (2/31)	0 (0/21)	0 (0/36)	0.17 (3/42)	0.72 (13/41)	0 (0/35)	4.24853e-09	0	7	3_prime_UTR_variant	Sobic.010G182300	MODIFIER	elongation factor Tu
Chr10_52243084_52244423_DEL	0 (0/32)	0.04 (2/32)	0.02 (1/29)	0 (0/30)	0.04 (2/31)	0.81 (39/55)	0.04 (2/40)	0.04 (2/33)	2.58201e-22	0	6	upstream_gene_variant	Sobic.010G182800	MODIFIER	lectin-like receptor kinase 1
Chr10_53336964_53337360_DEL	0 (0/36)	0.06 (1/35)	0 (0/36)	0.06 (1/30)	0.12 (2/33)	0 (0/56)	0 (0/54)	0.75 (12/36)	7.11242e-12	0	8	upstream_gene_variant	Sobic.010G191750	MODIFIER	receptor-like protein kinase 5 precursor
Chr10_53540055_53541497_DEL	0.7 (21/28)	0 (0/34)	0 (0/28)	0 (0/29)	0.07 (2/34)	0.2 (6/50)	0 (0/43)	0.03 (1/33)	8.64289e-24	0	1	exon_loss_variant	Sobic.010G193400	HIGH	GDSL-like lipase/acylhydrolase
Chr10_55005319_55006714_DEL	0.95 (18/27)	0 (0/32)	0 (0/29)	0 (0/29)	0.05 (1/31)	0 (0/54)	0 (0/47)	0 (0/33)	3.92406e-31	0	1	exon_loss_variant	Sobic.010G207250	HIGH	expressed protein
Chr10_55449308_55449783_DEL	0.79 (26/36)	0 (0/34)	0 (0/31)	0 (0/29)	0.21 (7/35)	0 (0/51)	0 (0/36)	0 (0/28)	1.20784e-26	0	1	upstream_gene_variant	Sobic.010G211500	MODIFIER	DNA-directed RNA polymerase 3A, chloroplast precursor
Chr10_56020160_56020547_DEL	0 (0/34)	0 (0/39)	0.11 (2/33)	0.05 (1/24)	0 (0/36)	0 (0/50)	0.84 (16/47)	0 (0/34)	2.71898e-12	0	7	upstream_gene_variant	Sobic.010G217001	MODIFIER
Chr10_56734041_56734096_DEL	0.86 (19/32)	0 (0/44)	0 (0/33)	0 (0/25)	0.14 (3/34)	0 (0/43)	0 (0/50)	0 (0/39)	4.56948e-26	0	1	intergenic_region	Sobic.010G225001-Sobic.010G225100	MODIFIER
Chr10_57177098_57177239_DEL	0.72 (18/27)	0 (0/42)	0 (0/34)	0 (0/26)	0.24 (6/35)	0 (0/49)	0.04 (1/54)	0 (0/35)	1.79089e-25	0	1	exon_loss_variant&splice_acceptor_variant&splice_region_variant&intron_variant	Sobic.010G228800	HIGH	leucine rich repeat
Chr10_57197877_57198113_DEL	0.8 (20/36)	0.04 (1/36)	0 (0/30)	0 (0/20)	0.16 (4/36)	0 (0/41)	0 (0/47)	0 (0/35)	9.08701e-20	0	1	upstream_gene_variant	Sobic.010G229050	MODIFIER
Chr10_57804853_57807507_DEL	0 (0/38)	0 (0/37)	0.05 (1/30)	0.1 (2/27)	0 (0/35)	0 (0/51)	0.81 (17/35)	0.05 (1/33)	1.58603e-17	0	7	upstream_gene_variant	Sobic.010G235800	MODIFIER	OsFBLD1 - F-box, LRR and FBD domain containing protein
Chr10_5785973_5787250_DEL	0.87 (13/37)	0 (0/32)	0 (0/31)	0 (0/30)	0.13 (2/36)	0 (0/54)	0 (0/42)	0 (0/33)	5.58797e-14	0	1	upstream_gene_variant	Sobic.010G071650	MODIFIER
Chr10_5826740_5826804_DEL	0.88 (14/32)	0 (0/42)	0 (0/31)	0 (0/22)	0.12 (2/34)	0 (0/42)	0 (0/47)	0 (0/35)	1.05568e-17	0	1	upstream_gene_variant	Sobic.010G072100	MODIFIER	dehydrogenase
Chr10_58549858_58553024_DEL	0.91 (21/33)	0 (0/33)	0 (0/31)	0 (0/25)	0.09 (2/33)	0 (0/51)	0 (0/47)	0 (0/33)	5.30667e-28	0	1	feature_ablation	Sobic.010G245601&Sobic.010G245701	HIGH	DNA polymerase I family protein& anthocyanidin 5,3-O-glucosyltransferase
Chr10_591469_591812_DEL	0.83 (15/27)	0 (0/36)	0.06 (1/32)	0 (0/22)	0.06 (1/35)	0 (0/51)	0 (0/48)	0.06 (1/28)	2.59073e-21	0	1	upstream_gene_variant	Sobic.010G007500	MODIFIER	adenylate kinase
Chr10_59414065_59414433_DEL	0 (0/42)	0.05 (1/41)	0.23 (5/31)	0 (0/19)	0 (0/37)	0 (0/46)	0.73 (16/46)	0 (0/36)	1.77838e-11	0	7	upstream_gene_variant	Sobic.010G255500	MODIFIER	exostosin
Chr10_59999401_59999551_DEL	0 (0/39)	0 (0/43)	0.16 (3/35)	0 (0/24)	0 (0/34)	0.05 (1/52)	0.79 (15/37)	0 (0/34)	9.86124e-15	0	7	upstream_gene_variant	Sobic.010G263800	MODIFIER	UPF0183 protein
Chr10_60659020_60673963_DEL	0.75 (12/31)	0 (0/38)	0 (0/29)	0 (0/31)	0.25 (4/37)	0 (0/55)	0 (0/48)	0 (0/35)	1.10245e-14	0	1	upstream_gene_variant	Sobic.010G273600	MODIFIER	CHIT4 - Chitinase family protein precursor
Chr10_60683411_60683474_DEL	0.92 (12/23)	0 (0/41)	0 (0/34)	0 (0/25)	0.08 (1/35)	0 (0/42)	0 (0/49)	0 (0/31)	2.34837e-23	0	1	downstream_gene_variant	Sobic.010G273800	MODIFIER	1,4-alpha-glucan-branching enzyme, chloroplast precursor
Chr10_6429281_6429406_DEL	0.71 (27/27)	0 (0/38)	0 (0/33)	0 (0/25)	0.08 (3/34)	0 (0/47)	0 (0/46)	0.21 (8/31)	3.35529e-35	0	1	upstream_gene_variant	Sobic.010G077275	MODIFIER
Chr10_6541850_6548853_DEL	0 (0/33)	0 (0/36)	0.09 (3/28)	0 (0/29)	0.12 (4/35)	0 (0/53)	0.79 (27/41)	0 (0/30)	3.61036e-23	0	7	transcript_ablation	Sobic.010G078500	HIGH
Chr10_7397277_7398541_DEL	0 (0/36)	0 (0/35)	0 (0/30)	0 (0/31)	0.06 (1/35)	0 (0/54)	0 (0/46)	0.94 (17/33)	1.33369e-24	0	8	downstream_gene_variant	Sobic.010G086000	MODIFIER	cyclin
Chr10_7704225_7705190_DEL	0 (0/30)	0 (0/34)	0.13 (2/29)	0.87 (13/16)	0 (0/35)	0 (0/53)	0 (0/49)	0 (0/36)	9.69206e-37	0	4	downstream_gene_variant	Sobic.010G089500	MODIFIER	annexin
Chr10_785426_786141_DEL	0 (0/33)	0 (0/36)	0 (0/29)	0.12 (3/28)	0.12 (3/34)	0 (0/50)	0.73 (19/42)	0.04 (1/30)	2.34905e-13	0	7	splice_region_variant	Sobic.010G009600	LOW	OsFBX182 - F-box domain containing protein
Chr10_7975159_7979489_DEL	0.7 (14/31)	0 (0/37)	0.25 (5/34)	0 (0/30)	0 (0/34)	0.05 (1/56)	0 (0/52)	0 (0/36)	1.44353e-16	0	1	transcript_ablation	Sobic.010G091333	HIGH
Chr10_8545370_8549270_DEL	0.02 (1/39)	0.02 (1/33)	0 (0/33)	0 (0/28)	0.14 (6/37)	0.05 (2/51)	0.05 (2/47)	0.71 (30/34)	1.43281e-30	0	8	downstream_gene_variant	Sobic.010G095200	MODIFIER	glutathione S-transferase, N-terminal domain containing protein
Chr10_8653426_8654401_DEL	0.05 (1/39)	0.14 (3/33)	0 (0/32)	0 (0/29)	0.76 (16/40)	0 (0/48)	0 (0/51)	0.05 (1/36)	4.14781e-14	0	5	upstream_gene_variant	Sobic.010G096200	MODIFIER	expressed protein
Chr10_8962138_8962968_DEL	0.02 (1/31)	0.09 (4/33)	0 (0/29)	0 (0/31)	0.16 (7/32)	0 (0/53)	0 (0/41)	0.72 (31/37)	7.28135e-28	0	8	upstream_gene_variant	Sobic.010G099000	MODIFIER	spotted leaf 11
Chr10_9042869_9043355_DEL	0.78 (31/38)	0 (0/31)	0 (0/30)	0.05 (2/30)	0.1 (4/31)	0.07 (3/52)	0 (0/40)	0 (0/33)	2.74198e-28	0	1	upstream_gene_variant	Sobic.010G099800	MODIFIER	growth regulator related protein
Chr10_9823219_9837909_DEL	0 (0/39)	0 (0/41)	0.1 (2/33)	0.71 (15/30)	0.14 (3/37)	0 (0/57)	0 (0/51)	0.05 (1/37)	6.30233e-19	0	4	downstream_gene_variant	Sobic.010G104400	MODIFIER	cysteine-rich repeat secretory protein precursor

## Sheet: Supplemen table 4
Supplement table 4 Types of variant and their impact on genes from SNPEff in non-cluster-specific and cluster-specific clusters.
Types of variant	Impact on genes	Non-cluster-specific deletions	Total of each type of non-cluster-specific deletions	Cluster-specific	Total of each type of cluster-specific deletions	Cluster1	Cluster2	Cluster3	Cluster4	Cluster5	Cluster6	Cluster7	Cluster8
upstream_gene_variant	MODIFIER	2844	2844	280	280	156	5	3	23	6	14	39	34
intergenic_region	MODIFIER	1459	1459	192	192	89	8	2	18	3	21	35	16
downstream_gene_variant	LOW	12	1249	1	149	0	0	0	1	0	0	0	0
	MODIFIER	1237		148		88	1	2	15	3	6	17	16
intron_variant	HIGH	117	394	13	42	10	0	0	0	1	0	1	1
	LOW	10		0		0	0	0	0	0	0	0	0
	MODIFIER	267		29		14	4	0	1	0	1	5	4
splice_region_variant	HIGH	160	341	17	33	13	0	0	0	1	0	1	2
	LOW	181		16		5	2	1	2	0	0	4	2
transcript_ablation	HIGH	249	249	11	11	4	0	0	1	0	1	3	2
exon_loss_variant	HIGH	220	220	25	25	14	0	0	3	1	1	2	4
undetermined	NO IMPACT	160	160	15	15	8	0	0	0	0	0	3	4
3_prime_UTR_variant	HIGH	10	95	3	14	2	0	0	0	0	0	0	1
	MODIFIER	85		11		4	0	0	1	0	0	2	4
5_prime_UTR_variant	HIGH	6	94	3	15	3	0	0	0	0	0	0	0
	MODIFIER	88		12		7	0	0	1	0	0	1	3
frameshift_variant	HIGH	70	70	13	13	6	1	0	2	1	0	1	2
splice_acceptor_variant	HIGH	69	69	9	9	8	0	0	0	0	0	1	0
splice_donor_variant	HIGH	64	64	5	5	3	0	0	0	1	0	0	1
gene_fusion	HIGH	47	47	4	4	3	0	0	0	0	0	1	0
start_lost	HIGH	43	43	6	6	3	0	0	1	0	0	1	1
feature_ablation	HIGH	41	41	3	3	2	0	0	0	0	0	1	0
conservative_inframe_deletion	HIGH	29	39	0	0	0	0	0	0	0	0	0	0
	MODERATE	10		2		1	0	0	0	0	0	1	0
3_prime_UTR_truncation	HIGH	35	35	4	4	2	0	0	0	0	0	1	1
stop_lost	HIGH	33	33	2	2	1	0	0	0	1	0	0	0
bidirectional_gene_fusion	HIGH	28	28	3	3	2	0	0	0	0	0	1	0
disruptive_inframe_deletion	HIGH	3	5	1	1	1	0	0	0	0	0	0	0
	MODERATE	2		0		0	0	0	0	0	0	0	0

## Sheet: Supplement table 5
Supplement table 5 List of unique gene IDs with a CDS region impacted by a cluster-specific deletion.
Groups	Genes	Gene annotationes	Potential functions in local adaptations	Stress category	Reported organisms
Cluster 1	Sobic.001G060666
	Sobic.001G060732
	Sobic.001G209701	zinc knuckle family protein, expressed
	Sobic.001G252050
	Sobic.001G297966
	Sobic.001G311601
	Sobic.001G486500	tRNA methyltransferase, putative, expressed
	Sobic.002G096900	autophagy-related protein 3, putative, expressed	viral diesease resistance	biotic stress	cotton
	Sobic.003G032301
	Sobic.003G040200	60s ribosomal protein L18A
	Sobic.003G098650
	Sobic.003G178400
	Sobic.003G436800	luteolin triglucuronide degradation	toxin metabolism	biotic stress	rye
	Sobic.004G042400	Myb/SANT-like DNA-binding domain	drought tolerance	abiotic stress	sugarcane	3665
	Sobic.004G120000	expansin precursor, putative, expressed	drought and salt tolerance	abiotic stress	arabidopsis	3318
	Sobic.004G147050	retrotransposon protein, putative, unclassified, expressed
	Sobic.004G183600	molybdenum cofactor biosynthesis protein 1, putative, expressed	drought tolerance	abiotic stress	maize	-80
	Sobic.004G183701
	Sobic.004G211301
	Sobic.005G064500
	Sobic.006G100332	expressed protein
	Sobic.006G100400	expressed protein
	Sobic.006G239900	Cf-4A protein, putative, expressed	R gene	biotic stress	tomato
	Sobic.007G021200	carrier, putative, expressed
	Sobic.007G154901	bifunctional monodehydroascorbate reductase and carbonic anhydrasenectarin-3 precursor, putative, expressed	ROS stress	abiotic stress	sweet potato	-584
	Sobic.008G040600	bZIP transcription factor domain containing protein, expressed	drought and salt tolerance	abiotic stress	barley and rice	-2522
	Sobic.008G100400	pentatricopeptide, putative, expressed	drought tolerance	abiotic stress	wheat	-582
	Sobic.008G101400
	Sobic.008G121080
	Sobic.008G166200	expressed protein
	Sobic.009G111901
	Sobic.009G115050
	Sobic.009G127900
	Sobic.009G128000
	Sobic.010G091333
	Sobic.010G193400	GDSL-like lipase/acylhydrolase, putative, expressed	drought and pathogen resistance	both stress	sorghum
	Sobic.010G207250	expressed protein
	Sobic.010G228800	leucine rich repeat	R gene	biotic stress	most plants
	Sobic.010G245601	DNA polymerase I family protein, expressed
	Sobic.010G245701	anthocyanidin 5,3-O-glucosyltransferase, putative, expressed	flavonoid	latitude adaptation	Pinus sylvestris
Cluster 2	Sobic.010G049700	expressed protein
Cluster 4	Sobic.001G238500	UDP-glucoronosyl and UDP-glucosyl transferase domain containing protein, expressed	flavonoid	latitude adaptation	Pinus sylvestris
	Sobic.002G363901	late embryogenesis abundant (LEA) hydroxyproline-rich glycoprotein-related	drought and salt tolerance	abiotic stress	sweet orange	-1553
	Sobic.002G400200	CS domain containing protein, putative, expressed& CS domain containing protein, putative, expressed
	Sobic.004G117000	xa1, putative, expressed	bacterial resistance	biotic stress	rice
	Sobic.009G090100	OsSCP28 - Putative Serine Carboxypeptidase homologue, expressed
	Sobic.009G247601	pre-mRNA-processing factor 6, putative, expressed
Cluster 5	Sobic.005G081000	pentatricopeptide, putative, expressed	drought tolerance	abiotic stress	wheat	-1472
	Sobic.009G086900	expressed protein
Cluster 6	Sobic.003G435900	disease resistance protein RPS2, putative, expressed	disease	biotic stress	arabidopsis
	Sobic.010G140575	retrotransposon protein, putative, unclassified, expressed
Cluster 7	Sobic.001G343601	sterol-4-alpha-carboxylate 3-dehydrogenase, decarboxylating, putative, expressed
	Sobic.001G343700	transposon protein, putative, unclassified, expressed
	Sobic.001G343766	ulp1 protease family, C-terminal catalytic domain containing protein, expressed
	Sobic.001G343832	NAD dependent epimerase/dehydratase family protein, putative, expressed
	Sobic.002G216200	cytochrome P450, putative, expressed
	Sobic.003G067800	universal stress protein domain containing protein, putative, expressed
	Sobic.003G067900
	Sobic.005G023201
	Sobic.005G047500	expressed protein
	Sobic.005G084800	expressed protein
	Sobic.009G049850	pattern formation protein EMB30, putative, expressed
	Sobic.009G053201
	Sobic.010G078500
Cluster 8	Sobic.001G201200
	Sobic.001G249900
	Sobic.001G250000
	Sobic.001G252600	AAA-type ATPase family protein, putative, expressed	salt stress	abiotic stress	﻿halophyte ice plant (Mesembryanthemum crystallinum)	-3139
	Sobic.005G023600	pollen allergen Cyn d 23, putative, expressed
	Sobic.005G132033	retrotransposon protein, putative, unclassified, expressed
	Sobic.006G200400	expressed protein
	Sobic.007G011400	armadillo/beta-catenin repeat family protein, putative, expressed
	Sobic.010G148501

## Sheet: Supplement table 6
Supplement table 6 Enriched gene ontology of overall deletions on CDS showed GO ID from Fisher's Exact Test.
GO.ID	Term	Annotated	Significant	Expected	Rank in classic	p-value classic	p-value KS	p-value weight
GO:0008234	cysteine-type peptidase activity	121	16	1.7	1	1.2e-11	0.9976	1.2e-11
GO:0046872	metal ion binding	1867	43	26.24	3	0.00061	0.9689	0.00061
GO:0043531	ADP binding	302	12	4.25	5	0.00117	0.6385	0.00117
GO:0016616	oxidoreductase activity, acting on the C...	108	6	1.52	8	0.00417	0.2805	0.02753
GO:0004347	glucose-6-phosphate isomerase activity	2	1	0.03	11	0.02792	0.7530	0.02792
GO:0003935	GTP cyclohydrolase II activity	3	1	0.04	12	0.04158	0.9999	0.04158
GO:0008686	3,4-dihydroxy-2-butanone-4-phosphate syn...	3	1	0.04	13	0.04158	0.9999	0.04158
GO:0030247	polysaccharide binding	96	4	1.35	14	0.04632	0.1221	0.04632
GO:0008408	3'-5' exonuclease activity	26	2	0.37	15	0.05123	0.0200	0.05123
GO:0051015	actin filament binding	4	1	0.06	16	0.05506	0.7931	0.05506
GO:0003854	3-beta-hydroxy-delta5-steroid dehydrogen...	30	2	0.42	18	0.06614	0.0549	0.06614
GO:0005094	Rho GDP-dissociation inhibitor activity	5	1	0.07	21	0.06835	0.9995	0.06835
GO:0005337	nucleoside transmembrane transporter act...	5	1	0.07	22	0.06835	0.3356	0.06835
GO:0016620	oxidoreductase activity, acting on the a...	31	2	0.44	25	0.07007	0.9337	0.07007
GO:0010333	terpene synthase activity	43	2	0.6	35	0.12222	0.2287	0.12222
GO:0030599	pectinesterase activity	43	2	0.6	36	0.12222	0.4471	0.12222
GO:0051539	4 iron, 4 sulfur cluster binding	10	1	0.14	38	0.13205	0.6548	0.13205
GO:0015018	galactosylgalactosylxylosylprotein 3-bet...	11	1	0.15	40	0.14426	0.8646	0.14426
GO:0019139	cytokinin dehydrogenase activity	11	1	0.15	41	0.14426	0.5077	0.14426
GO:0015078	proton transmembrane transporter activit...	94	3	1.32	42	0.14614	0.9985	0.14614
GO:0005544	calcium-dependent phospholipid binding	12	1	0.17	44	0.15630	0.4331	0.15630
GO:0004427	inorganic diphosphatase activity	15	1	0.21	49	0.19141	1.0000	0.19141
GO:0003697	single-stranded DNA binding	16	1	0.22	52	0.20279	0.2063	0.20279
GO:0030598	rRNA N-glycosylase activity	18	1	0.25	56	0.22507	0.5036	0.22507
GO:0051087	chaperone binding	18	1	0.25	57	0.22507	0.7819	0.22507
GO:0004499	N,N-dimethylaniline monooxygenase activi...	20	1	0.28	62	0.24674	0.0045	0.24674
GO:0043169	cation binding	1879	43	26.41	4	0.00070	0.9694	0.27052
GO:0016705	oxidoreductase activity, acting on paire...	398	8	5.59	50	0.19835	0.0038	0.28797
GO:0020037	heme binding	520	9	7.31	79	0.30948	0.0043	0.30948
GO:0009378	four-way junction helicase activity	29	1	0.41	85	0.33700	0.8125	0.33700
GO:0015171	amino acid transmembrane transporter act...	29	1	0.41	86	0.33700	0.1971	0.33700
GO:0016702	oxidoreductase activity, acting on singl...	30	1	0.42	92	0.34634	0.0398	0.34634
GO:0050661	NADP binding	32	1	0.45	94	0.36463	0.0143	0.36463
GO:0050660	flavin adenine dinucleotide binding	92	2	1.29	97	0.37186	0.7102	0.37186
GO:0008270	zinc ion binding	922	23	12.96	9	0.00520	0.9985	0.39916
GO:0003924	GTPase activity	42	1	0.59	105	0.44872	0.0204	0.44872
GO:0051287	NAD binding	51	1	0.72	111	0.51488	0.2250	0.51488
GO:0004812	aminoacyl-tRNA ligase activity	58	1	0.82	113	0.56083	0.1548	0.56083
GO:0008171	O-methyltransferase activity	60	1	0.84	117	0.57314	0.9483	0.57314
GO:0004185	serine-type carboxypeptidase activity	61	1	0.86	118	0.57917	0.1106	0.57917
GO:0015297	antiporter activity	87	2	1.22	93	0.34647	0.6742	0.60108
GO:0005515	protein binding	2785	39	39.15	112	0.53999	0.3362	0.63132
GO:0004518	nuclease activity	94	3	1.32	43	0.14614	0.1145	0.63165
GO:0046906	tetrapyrrole binding	529	9	7.44	80	0.32710	0.0028	0.64698
GO:0004601	peroxidase activity	176	2	2.47	140	0.71153	0.2843	0.71153
GO:0005525	GTP binding	178	2	2.5	141	0.71738	0.0461	0.71738
GO:0016758	transferase activity, transferring hexos...	442	6	6.21	121	0.59241	0.4647	0.73082
GO:0004672	protein kinase activity	1212	15	17.04	147	0.73536	0.6943	0.73536
GO:0003700	DNA-binding transcription factor activit...	518	6	7.28	149	0.74098	0.5452	0.74098
GO:0005488	binding	7867	121	110.59	24	0.06872	0.1746	0.76708
GO:0043167	ion binding	3964	74	55.72	6	0.00258	0.9951	0.78457
GO:0004842	ubiquitin-protein transferase activity	112	1	1.57	157	0.79653	0.4148	0.79653
GO:0032559	adenyl ribonucleotide binding	1727	28	24.28	60	0.23599	0.6437	0.81386
GO:0000166	nucleotide binding	2136	33	30.03	77	0.30414	0.8990	0.81567
GO:0017076	purine nucleotide binding	1913	30	26.89	72	0.28633	0.8706	0.81626
GO:0030554	adenyl nucleotide binding	1731	28	24.33	61	0.23987	0.6251	0.81767
GO:0016779	nucleotidyltransferase activity	121	1	1.7	160	0.82107	0.8549	0.82107
GO:0032553	ribonucleotide binding	1927	30	27.09	76	0.30074	0.9104	0.82217
GO:0140110	transcription regulator activity	538	6	7.56	155	0.77291	0.4788	0.82930
GO:1901265	nucleoside phosphate binding	2136	33	30.03	78	0.30414	0.8990	0.83379
GO:0032555	purine ribonucleotide binding	1905	30	26.78	70	0.27822	0.8563	0.84122
GO:0016684	oxidoreductase activity, acting on perox...	178	2	2.5	142	0.71738	0.2688	0.84656
GO:0016853	isomerase activity	141	2	1.98	122	0.59242	0.0375	0.84791
GO:0016209	antioxidant activity	187	2	2.63	150	0.74245	0.4532	0.85922
GO:0035639	purine ribonucleoside triphosphate bindi...	1601	18	22.51	166	0.87341	0.0892	0.87230
GO:0097367	carbohydrate derivative binding	1957	30	27.51	84	0.33245	0.9192	0.87382
GO:0008236	serine-type peptidase activity	170	2	2.39	135	0.69340	0.0332	0.87393
GO:0097159	organic cyclic compound binding	4505	62	63.33	126	0.60883	0.2926	0.87448
GO:1901363	heterocyclic compound binding	4505	62	63.33	127	0.60883	0.2926	0.87448
GO:0016773	phosphotransferase activity, alcohol gro...	1340	15	18.84	163	0.85698	0.4960	0.88555
GO:0016301	kinase activity	1342	15	18.86	164	0.85847	0.6868	0.88701
GO:0003676	nucleic acid binding	1961	23	27.57	162	0.85442	0.0299	0.88704
GO:0005524	ATP binding	1423	16	20	165	0.85977	0.1511	0.88814
GO:0036094	small molecule binding	2243	33	31.53	99	0.41645	0.8071	0.89199
GO:0043168	anion binding	2169	33	30.49	91	0.33773	0.9677	0.90018
GO:0046983	protein dimerization activity	281	3	3.95	153	0.75965	0.6943	0.91077
GO:0016757	transferase activity, transferring glyco...	531	6	7.46	154	0.76208	0.2174	0.91081
GO:0016491	oxidoreductase activity	1557	26	21.89	51	0.20134	0.1211	0.92700
GO:0016772	transferase activity, transferring phosp...	1532	16	21.54	173	0.92289	0.8106	0.93298
GO:0022857	transmembrane transporter activity	526	7	7.39	128	0.61249	0.3839	0.95732
GO:0004553	hydrolase activity, hydrolyzing O-glycos...	360	2	5.06	177	0.96420	0.1839	0.96420
GO:0016798	hydrolase activity, acting on glycosyl b...	393	3	5.52	172	0.91777	0.1934	0.96502
GO:0016747	transferase activity, transferring acyl ...	241	1	3.39	178	0.96803	0.8671	0.96803
GO:0016788	hydrolase activity, acting on ester bond...	470	6	6.61	132	0.65198	0.2215	0.96965
GO:0140096	catalytic activity, acting on a protein	2006	34	28.2	39	0.13845	0.9860	0.97091
GO:0098772	molecular function regulator	753	7	10.59	171	0.91064	0.1855	0.97563
GO:0005215	transporter activity	719	8	10.11	158	0.79863	0.3974	0.97828
GO:0003677	DNA binding	1110	10	15.6	175	0.95549	0.1046	0.97881
GO:0016787	hydrolase activity	1983	35	27.88	26	0.08824	0.7629	0.99010
GO:0016740	transferase activity	2789	27	39.21	184	0.99147	0.8597	0.99432
GO:0003824	catalytic activity	7017	98	98.64	116	0.56694	0.1961	0.99735
GO:0000287	magnesium ion binding	105	2	1.48	103	0.43586	0.2408	1.00000
GO:0001882	nucleoside binding	190	2	2.67	152	0.75038	0.0550	1.00000
GO:0001883	purine nucleoside binding	178	2	2.5	143	0.71738	0.0461	1.00000
GO:0003674	molecular_function	13374	188	188	185	1.00000	1.0000	1.00000
GO:0003678	DNA helicase activity	38	1	0.53	100	0.41650	0.8586	1.00000
GO:0003779	actin binding	22	1	0.31	66	0.26780	0.0355	1.00000
GO:0003933	GTP cyclohydrolase activity	4	1	0.06	17	0.05506	0.9999	1.00000
GO:0004180	carboxypeptidase activity	62	1	0.87	120	0.58511	0.0941	1.00000
GO:0004386	helicase activity	58	1	0.82	114	0.56083	0.2165	1.00000
GO:0004470	malic enzyme activity	9	1	0.13	33	0.11966	0.2416	1.00000
GO:0004471	malate dehydrogenase (decarboxylating) (...	9	1	0.13	34	0.11966	0.2416	1.00000
GO:0004497	monooxygenase activity	28	1	0.39	81	0.32753	0.0020	1.00000
GO:0004527	exonuclease activity	36	2	0.51	27	0.09076	0.0555	1.00000
GO:0005092	GDP-dissociation inhibitor activity	5	1	0.07	23	0.06835	0.9995	1.00000
GO:0005342	organic acid transmembrane transporter a...	29	1	0.41	87	0.33700	0.1971	1.00000
GO:0005506	iron ion binding	399	9	5.61	32	0.11035	0.0495	1.00000
GO:0005509	calcium ion binding	124	3	1.74	65	0.25336	0.2100	1.00000
GO:0005543	phospholipid binding	37	1	0.52	98	0.40816	0.9882	1.00000
GO:0008092	cytoskeletal protein binding	94	1	1.32	148	0.73695	0.4462	1.00000
GO:0008094	DNA-dependent ATPase activity	45	1	0.63	107	0.47171	0.6890	1.00000
GO:0008168	methyltransferase activity	249	1	3.5	180	0.97152	0.5588	1.00000
GO:0008194	UDP-glycosyltransferase activity	123	1	1.73	161	0.82611	0.2075	1.00000
GO:0008233	peptidase activity	505	18	7.1	2	0.00027	0.9980	1.00000
GO:0008238	exopeptidase activity	75	1	1.05	133	0.65518	0.2387	1.00000
GO:0008289	lipid binding	85	1	1.19	137	0.70095	0.9237	1.00000
GO:0008324	cation transmembrane transporter activit...	188	3	2.64	110	0.49449	0.9557	1.00000
GO:0008509	anion transmembrane transporter activity	74	1	1.04	131	0.65024	0.1887	1.00000
GO:0008514	organic anion transmembrane transporter ...	32	1	0.45	95	0.36463	0.2779	1.00000
GO:0009678	pyrophosphate hydrolysis-driven proton t...	23	1	0.32	68	0.27811	0.3264	1.00000
GO:0015020	glucuronosyltransferase activity	12	1	0.17	45	0.15630	0.6799	1.00000
GO:0015075	ion transmembrane transporter activity	310	4	4.36	130	0.63763	0.6491	1.00000
GO:0015077	monovalent inorganic cation transmembran...	131	3	1.84	71	0.27997	0.8344	1.00000
GO:0015291	secondary active transmembrane transport...	110	2	1.55	106	0.45955	0.4752	1.00000
GO:0015298	solute:cation antiporter activity	28	1	0.39	82	0.32753	0.9571	1.00000
GO:0015299	solute:proton antiporter activity	28	1	0.39	83	0.32753	0.9571	1.00000
GO:0015318	inorganic molecular entity transmembrane...	294	4	4.13	123	0.59591	0.6899	1.00000
GO:0015399	primary active transmembrane transporter...	76	1	1.07	134	0.66005	0.4963	1.00000
GO:0015932	nucleobase-containing compound transmemb...	8	1	0.11	29	0.10710	0.6424	1.00000
GO:0016229	steroid dehydrogenase activity	30	2	0.42	19	0.06614	0.0549	1.00000
GO:0016462	pyrophosphatase activity	367	3	5.16	168	0.89313	0.6372	1.00000
GO:0016614	oxidoreductase activity, acting on CH-OH...	129	6	1.81	10	0.00975	0.2567	1.00000
GO:0016615	malate dehydrogenase activity	13	1	0.18	46	0.16817	0.5453	1.00000
GO:0016645	oxidoreductase activity, acting on the C...	19	1	0.27	59	0.23598	0.1499	1.00000
GO:0016701	oxidoreductase activity, acting on singl...	39	1	0.55	101	0.42473	0.0181	1.00000
GO:0016709	oxidoreductase activity, acting on paire...	20	1	0.28	63	0.24674	0.0045	1.00000
GO:0016741	transferase activity, transferring one-c...	259	1	3.64	181	0.97534	0.4061	1.00000
GO:0016746	transferase activity, transferring acyl ...	286	1	4.02	182	0.98331	0.8299	1.00000
GO:0016799	hydrolase activity, hydrolyzing N-glycos...	29	1	0.41	88	0.33700	0.7493	1.00000
GO:0016810	hydrolase activity, acting on carbon-nit...	39	1	0.55	102	0.42473	0.5214	1.00000
GO:0016814	hydrolase activity, acting on carbon-nit...	13	1	0.18	47	0.16817	0.9259	1.00000
GO:0016817	hydrolase activity, acting on acid anhyd...	384	3	5.4	170	0.90989	0.6007	1.00000
GO:0016818	hydrolase activity, acting on acid anhyd...	380	3	5.34	169	0.90617	0.6500	1.00000
GO:0016829	lyase activity	184	3	2.59	108	0.48023	0.0788	1.00000
GO:0016830	carbon-carbon lyase activity	61	1	0.86	119	0.57917	0.2672	1.00000
GO:0016835	carbon-oxygen lyase activity	76	2	1.07	73	0.28959	0.4420	1.00000
GO:0016838	carbon-oxygen lyase activity, acting on ...	45	2	0.63	37	0.13164	0.1885	1.00000
GO:0016860	intramolecular oxidoreductase activity	25	1	0.35	75	0.29829	0.0021	1.00000
GO:0016861	intramolecular oxidoreductase activity, ...	14	1	0.2	48	0.17987	0.3486	1.00000
GO:0016874	ligase activity	147	1	2.07	167	0.87663	0.1490	1.00000
GO:0016875	ligase activity, forming carbon-oxygen b...	58	1	0.82	115	0.56083	0.1548	1.00000
GO:0016887	ATPase activity	241	1	3.39	179	0.96803	0.5026	1.00000
GO:0016903	oxidoreductase activity, acting on the a...	39	2	0.55	28	0.10392	0.9186	1.00000
GO:0017111	nucleoside-triphosphatase activity	352	2	4.95	176	0.96055	0.4186	1.00000
GO:0017171	serine hydrolase activity	170	2	2.39	136	0.69340	0.0332	1.00000
GO:0019001	guanyl nucleotide binding	182	2	2.56	146	0.72876	0.0435	1.00000
GO:0019238	cyclohydrolase activity	8	1	0.11	30	0.10710	0.9994	1.00000
GO:0019787	ubiquitin-like protein transferase activ...	115	1	1.62	159	0.80506	0.6471	1.00000
GO:0022804	active transmembrane transporter activit...	186	3	2.61	109	0.48738	0.7002	1.00000
GO:0022853	active ion transmembrane transporter act...	76	2	1.07	74	0.28959	0.9278	1.00000
GO:0022890	inorganic cation transmembrane transport...	174	3	2.45	104	0.44380	0.9088	1.00000
GO:0030234	enzyme regulator activity	190	1	2.67	174	0.93341	0.2718	1.00000
GO:0030246	carbohydrate binding	189	4	2.66	67	0.27530	0.3320	1.00000
GO:0030597	RNA glycosylase activity	18	1	0.25	58	0.22507	0.5036	1.00000
GO:0030695	GTPase regulator activity	23	1	0.32	69	0.27811	0.6307	1.00000
GO:0032549	ribonucleoside binding	189	2	2.66	151	0.74776	0.0513	1.00000
GO:0032550	purine ribonucleoside binding	178	2	2.5	144	0.71738	0.0461	1.00000
GO:0032561	guanyl ribonucleotide binding	178	2	2.5	145	0.71738	0.0461	1.00000
GO:0033764	steroid dehydrogenase activity, acting o...	30	2	0.42	20	0.06614	0.0549	1.00000
GO:0043565	sequence-specific DNA binding	287	1	4.03	183	0.98355	0.0469	1.00000
GO:0044877	protein-containing complex binding	17	1	0.24	55	0.21401	0.5871	1.00000
GO:0046914	transition metal ion binding	1398	32	19.65	7	0.00376	0.9990	1.00000
GO:0046943	carboxylic acid transmembrane transporte...	29	1	0.41	89	0.33700	0.1971	1.00000
GO:0051213	dioxygenase activity	32	1	0.45	96	0.36463	0.0722	1.00000
GO:0051536	iron-sulfur cluster binding	65	1	0.91	124	0.60244	0.1362	1.00000
GO:0051540	metal cluster binding	65	1	0.91	125	0.60244	0.1362	1.00000
GO:0052689	carboxylic ester hydrolase activity	61	2	0.86	54	0.21150	0.2796	1.00000
GO:0060589	nucleoside-triphosphatase regulator acti...	29	1	0.41	90	0.33700	0.7051	1.00000
GO:0070008	serine-type exopeptidase activity	67	1	0.94	129	0.61360	0.2697	1.00000
GO:0080019	fatty-acyl-CoA reductase (alcohol-formin...	16	1	0.22	53	0.20279	0.4867	1.00000
GO:0140097	catalytic activity, acting on DNA	85	1	1.19	138	0.70095	0.9559	1.00000
GO:0140098	catalytic activity, acting on RNA	209	2	2.94	156	0.79588	0.5277	1.00000
GO:0140101	catalytic activity, acting on a tRNA	87	1	1.22	139	0.70935	0.2267	1.00000
GO:0140102	catalytic activity, acting on a rRNA	20	1	0.28	64	0.24674	0.8019	1.00000
GO:1901505	carbohydrate derivative transmembrane tr...	8	1	0.11	31	0.10710	0.6424	1.00000
GO:0000049	tRNA binding	9	0	0.13	186	1.00000	0.6153	1.00000
GO:0000062	fatty-acyl-CoA binding	5	0	0.07	187	1.00000	0.4923	1.00000
GO:0000149	SNARE binding	1	0	0.01	188	1.00000	0.2165	1.00000

## Sheet: Supplement table 7
Supplement table 7 Enriched gene ontology of cluster-specific deletions on CDS showed GO ID from Fisher's Exact Test.
GO.ID	Term	Annotated	Significant	Expected	Rank in classic	p-value classic	p-value KS	p-value weight
GO:0051539	4 iron, 4 sulfur cluster binding	10	1	0.01	1	0.015	0.6860	0.015
GO:0003854	3-beta-hydroxy-delta5-steroid dehydrogen...	30	1	0.04	2	0.044	0.0231	0.044
GO:0043531	ADP binding	302	2	0.45	5	0.074	0.2270	0.074
GO:0004185	serine-type carboxypeptidase activity	61	1	0.09	6	0.087	0.1421	0.087
GO:0016758	transferase activity, transferring hexos...	442	2	0.66	12	0.140	0.4958	0.140
GO:0046914	transition metal ion binding	1398	4	2.09	13	0.150	0.9924	0.150
GO:0004842	ubiquitin-protein transferase activity	112	1	0.17	15	0.155	0.5152	0.155
GO:0008234	cysteine-type peptidase activity	121	1	0.18	18	0.166	0.9832	0.166
GO:0020037	heme binding	520	2	0.78	21	0.181	0.0033	0.181
GO:0004601	peroxidase activity	176	1	0.26	28	0.233	0.3354	0.233
GO:0043565	sequence-specific DNA binding	287	1	0.43	35	0.352	0.0799	0.352
GO:0008270	zinc ion binding	922	3	1.38	16	0.156	0.9985	0.355
GO:0016705	oxidoreductase activity, acting on paire...	398	1	0.6	40	0.454	0.0017	0.454
GO:0003676	nucleic acid binding	1961	4	2.93	34	0.336	0.0366	0.472
GO:0097159	organic cyclic compound binding	4505	9	6.74	24	0.200	0.2532	0.500
GO:1901363	heterocyclic compound binding	4505	9	6.74	25	0.200	0.2532	0.500
GO:0016788	hydrolase activity, acting on ester bond...	470	1	0.7	44	0.511	0.2223	0.511
GO:0003700	DNA-binding transcription factor activit...	518	1	0.77	45	0.546	0.6152	0.546
GO:0016740	transferase activity	2789	5	4.17	38	0.408	0.8999	0.566
GO:0005215	transporter activity	719	1	1.08	56	0.669	0.4647	0.669

## Sheet: Supplement table 8
Supplement table 7 Comparisons between called SVs and simulated SVs in two sorghum reference genomes among three depths (20, 100, 200X)
Comparisons	BTx623			Rio
Depth	20	100	200	20	100	200
Total called SVs	2558	6295	2328	2706	6119	6060
Called SVs overlap with simulated SVs (TP)	1977	4538	1785	2027	4381	4333
Simulated SV not detected by SV caller (FN)	529	369	772	398	262	268
Called SVs but not overlap with simulated SVs (FP)	581	1757	543	679	1738	1727
Sensitivity (True positive rate)	0.788907	0.924801	0.698084	0.835876	0.943571	0.941752
Accuracy (F1)	0.780806	0.810212	0.730809	0.790099	0.814161	0.812869
Precision	0.772869	0.72089	0.766753	0.749076	0.715967	0.715017
